# Supplementary material
Source: publisher figshare collection journal article supplement (https://gsapubs.figshare.com/ndownloader/files/22411878)
Supplement: Supplementary file 1 [file 22411878]

**Data Repository Item C** –  $^{40}\text{Ar}/^{39}\text{Ar}$  analytical methods and results from volcanic and intrusive rocks and detrital amphiboles.

## **<sup>40</sup>Ar/<sup>39</sup>Ar Analysis Methods**

For <sup>40</sup>Ar/<sup>39</sup>Ar analysis, 5 lava, 2 intrusion, one feldspar dike, and a detrital hornblende rich sandstone sample were submitted to the Geochronology laboratory at UAF where they it crushed, sieved, washed and hand-picked for pure feldspar and hornblende mineral phase separates and phenocryst free ground mass (whole rock) chips (~500 microns). The monitor mineral MMhb-1 (Samson and Alexander, 1987) with an age of 523.5 Ma (Renne et al., 1994) was used to monitor neutron flux (and calculate the irradiation parameter, J). The samples and standards were wrapped in aluminum foil and loaded into aluminum cans of 2.5 cm diameter and 6 cm height. The samples were irradiated in position 5c of the uranium enriched research reactor of McMaster University in Hamilton, Ontario, Canada for 20 megawatt-hours.

Upon their return from the reactor, the sample and monitors were loaded into 2 mm diameter holes in a copper tray that was then loaded in an ultra-high vacuum extraction line. The monitors were fused, and samples heated, using a 6-watt argon-ion laser following the technique described in York et al. (1981), Layer et al. (1987) and Layer (2000). Argon purification was achieved using a liquid nitrogen cold trap and a SAES Zr-Al getter at 400C. The samples were analyzed in a VG-3600 mass spectrometer at the Geophysical Institute, University of Alaska Fairbanks. The lava, intrusion, and feldspar dike samples were step-heated via incremental heating (e.g. Benowitz et al., 2014). The detrital hornblende grains from the sandstone sample were analyzed using the single grain fusion technique (e.g. Broussard et al., 2018). The argon isotopes measured were corrected for system blank and mass discrimination, as well as calcium, potassium and chlorine interference reactions following procedures outlined in McDougall and Harrison (1999). Typical full-system 8 min laser blank values (in moles) were generally  $2 \times 10^{-16}$  mol <sup>40</sup>Ar,  $3 \times 10^{-16}$  mol <sup>39</sup>Ar,  $9 \times 10^{-18}$  mol <sup>38</sup>Ar and  $2 \times 10^{-18}$  mol <sup>36</sup>Ar, which are 10–50 times smaller than the sample/standard volume fractions. Correction factors for nucleogenic interferences during irradiation were determined from irradiated CaF<sub>2</sub> and K<sub>2</sub>SO<sub>4</sub> as follows: (<sup>39</sup>Ar/<sup>37</sup>Ar)Ca =  $7.06 \times 10^{-4}$ , (<sup>36</sup>Ar/<sup>37</sup>Ar)Ca =  $2.79 \times 10^{-4}$  and (<sup>40</sup>Ar/<sup>39</sup>Ar)K = 0.0297. Mass discrimination was monitored by running calibrated air shots. The mass discrimination during these experiments was 1.3 % per mass unit. While doing our experiments, calibration measurements were made on a weekly to monthly basis to check for changes in mass discrimination with no significant variation seen during these intervals.

A summary of all the <sup>40</sup>Ar/<sup>39</sup>Ar results is given in Table 1, with all ages quoted to the  $\pm 1$  sigma level and calculated using the constants of Renne et al. (2010). The integrated age is the age given by the total gas measured and is equivalent to a potassium-argon (K-Ar) age. The spectrum provides a plateau age if three or more consecutive gas fractions represent at least 50% of the total gas release and are within two standard deviations of each other (Mean Square Weighted Deviation less than or equal to 2.5).

Benowitz, J., Layer, P. W., VanLaningham, S., 2014, Persistent Long-Term (~24 Ma) Exhumation in the Eastern Alaska Range Constrained by Stacked Thermochronology, Geological Society of London Special Volume, <sup>40</sup>Ar/<sup>39</sup>Ar Dating: from Geochronology to Thermochronology, from Archaeology to Planetary Sciences.

- Broussard, D. R., Trop, J. M., Benowitz, J. A., Daeschler, E. B., Chamberlain Jr, J. A. and Chamberlain, R.B., 2018, Depositional setting, taphonomy and geochronology of new fossil sites in the Catskill Formation (Upper Devonian) of north-central Pennsylvania, USA, including a new early tetrapod Fossil: *Palaeogeography, Palaeoclimatology, Palaeoecology*, 511, 168-187.
- Layer, P. W., Hall, C. M. and York, D., 1987, The derivation of  $^{40}\text{Ar}/^{39}\text{Ar}$  age spectra of single grains of hornblende and biotite by laser step heating, *Geophys. Res. Lett.*, 14, 757-760.
- McDougall, I. and Harrison, T. M., 1999, *Geochronology and Thermochronology by the  $^{40}\text{Ar}/^{39}\text{Ar}$  method*-2nd ed, Oxford University Press, New York, 269 pp.
- Renne, P. R., Mundil, R., Balco, G., Min, K., and Ludwig, K. R., 2010. Joint determination of 40K decay constants and  $^{40}\text{Ar}^*/^{40}\text{K}$  for the Fish Canyon sanidine standard, and improved accuracy for  $^{40}\text{Ar}/^{39}\text{Ar}$  geochronology. *Geochimica et Cosmochimica Acta*, 74(18), 5349.
- Renne, P. R., Deino, A. L., Walter, R. C., Turrin, B. D., Swisher, C. C., Becker, T. A., Curtis, G.H., Sharp. W.D., and Jaouni, A. R., 1994, Intercalibration of astronomical and radioisotopic time. *Geology*, 22(9), 783-786.
- Samson S. D., and Alexander E. C., 1987, Calibration of the interlaboratory  $^{40}\text{Ar}/^{39}\text{Ar}$  dating standard, MMhb1. *Chem. Geol.* 66, 27-34.
- Steiger, R.H. and Jaeger, E., 1977, Subcommittee on geochronology: Convention on the use of decay constants in geo and cosmochronology, *Earth and Planet Science Letters*, 36, 359-362.
- York, D., Hall, C.M., Yanase, Y., Hanes, J.A. and Kenyon, W.J., 1981,  $^{40}\text{Ar}/^{39}\text{Ar}$  dating of terrestrial minerals with a continuous laser, *Geophys. Res. Lett.*, 8, 1136-1138.

Data Repository Item DRB - <sup>40</sup>Ar/<sup>39</sup>Ar laser step=heat data for lavas, intrusions, and detrital amphiboles

Whole-rock lava sample CH1-1232 at Bonanza Creek

CH1-1232 HO#L1

Weighted average of J from standards = 2.516e-03 +/- 2.817e-05

| Laser Power<br>(mW) | Cumulative<br>39Ar | 40Ar/39Ar<br>meas. | +/-      | 37Ar/39Ar<br>meas. | +/-     | 36Ar/39Ar<br>meas. | +/-     | % Atm.<br>40Ar | +/-      | Ca/K      | +/-     | Cl/K    | +/-     | 40*/39K   | +/-      | Age<br>(Ma) | +/-<br>(Ma) |
|---------------------|--------------------|--------------------|----------|--------------------|---------|--------------------|---------|----------------|----------|-----------|---------|---------|---------|-----------|----------|-------------|-------------|
| 250                 | 0.0014             | 277.51065          | 40.48584 | 3.17329            | 0.53386 | 1.35168            | 0.24952 | 143.85163      | 16.48534 | 5.83563   | 0.98397 | 0.11504 | 0.0428  | -121.9533 | 49.02968 | -660.36     | 320.71      |
| 500                 | 0.0039             | 303.94886          | 22.30694 | 12.78267           | 0.95233 | 1.18835            | 0.10967 | 115.19641      | 6.6083   | 23.66809  | 1.77938 | 0.08461 | 0.01755 | -46.60558 | 20.50194 | -224.77     | 105.31      |
| 750                 | 0.0062             | 266.96265          | 29.72735 | 38.21665           | 4.25962 | 1.2245             | 0.15522 | 134.37367      | 8.28277  | 72.06733  | 8.25543 | 0.1209  | 0.02309 | -94.3     | 25.10887 | -488.06     | 149.26      |
| 1000                | 0.0085             | 153.15424          | 11.56522 | 54.68501           | 4.1373  | 0.72897            | 0.08927 | 137.73245      | 13.5738  | 104.37017 | 8.21352 | 0.07099 | 0.01494 | -60.09906 | 22.12351 | -295.44     | 118.18      |
| 1250                | 0.0106             | 165.54944          | 14.20005 | 8.57005            | 0.76169 | 0.85035            | 0.11929 | 151.3841       | 16.85872 | 15.82062  | 1.41467 | 0.08812 | 0.0213  | -85.56881 | 29.02513 | -436.9      | 167.71      |
| 1500                | 0.0151             | 68.78646           | 2.64701  | 8.0493             | 0.31493 | 0.29671            | 0.05284 | 126.55518      | 22.18085 | 14.8538   | 0.58448 | 0.12997 | 0.00908 | -18.36291 | 15.35353 | -85.24      | 72.99       |
| 1750                | 0.0302             | 48.04363           | 0.81497  | 7.91322            | 0.13866 | 0.06334            | 0.0131  | 37.62081       | 8.03801  | 14.60127  | 0.2573  | 0.14383 | 0.00354 | 30.11912  | 3.91617  | 131.64      | 16.51       |
| 2000                | 0.1158             | 27.93945           | 0.0962   | 7.3386             | 0.02735 | 0.00156            | 0.00223 | -0.51317       | 2.36454  | 13.53547  | 0.0507  | 0.13406 | 0.00079 | 28.19928  | 0.67053  | 123.53      | 2.84        |
| 2500                | 0.331              | 27.87916           | 0.08655  | 7.48949            | 0.02426 | 0.0047             | 0.00062 | 2.76679        | 0.66055  | 13.81525  | 0.04499 | 0.12152 | 0.00056 | 27.22307  | 0.20359  | 119.39      | 0.86        |
| 3000                | 0.7082             | 28.41416           | 0.06624  | 7.86321            | 0.0188  | 0.00751            | 0.00059 | 5.53629        | 0.61296  | 14.50847  | 0.03489 | 0.09936 | 0.00038 | 26.96289  | 0.18608  | 118.28      | 0.79        |
| 3500                | 0.8509             | 28.15247           | 0.1236   | 7.884              | 0.04101 | 0.0078             | 0.00092 | 5.88278        | 0.9697   | 14.54705  | 0.0761  | 0.13131 | 0.00075 | 26.61672  | 0.29876  | 116.81      | 1.27        |
| 4000                | 0.9422             | 28.88268           | 0.16434  | 8.59576            | 0.0518  | 0.00814            | 0.00268 | 5.87601        | 2.74597  | 15.86836  | 0.09621 | 0.15405 | 0.00113 | 27.32361  | 0.81288  | 119.81      | 3.45        |
| 5000                | 0.973              | 30.24011           | 0.40737  | 8.96844            | 0.13113 | 0.00992            | 0.00603 | 7.25728        | 5.90155  | 16.56074  | 0.24367 | 0.15279 | 0.00267 | 28.19672  | 1.83557  | 123.51      | 7.77        |
| 9000                | 1                  | 36.01108           | 0.47064  | 8.91536            | 0.12352 | 0.02914            | 0.00537 | 21.88713       | 4.39982  | 16.46211  | 0.22953 | 0.17072 | 0.00252 | 28.28432  | 1.6411   | 123.89      | 6.95        |
| Integrated          |                    | 31.18775           | 0.05058  | 8.05874            | 0.01383 | 0.02047            | 0.00071 | 17.28514       | 0.67188  | 14.87131  | 0.02566 | 0.12098 | 0.0003  | 25.92     | 0.21495  | 113.85      | 1.54        |

Whole-rock lava sample CH1-1438 at Bonanza Creek

CH1-1438 WR#L1

Weighted average of J from standards = 2.516e-03 +/- 2.817e-05

| Laser Power<br>(mW) | Cumulative<br>39Ar | 40Ar/39Ar<br>meas. | +/-     | 37Ar/39Ar<br>meas. | +/-     | 36Ar/39Ar<br>meas. | +/-     | % Atm.<br>40Ar | +/-      | Ca/K     | +/-     | Cl/K    | +/-     | 40*/39K  | +/-     | Age<br>(Ma) | +/-<br>(Ma) |
|---------------------|--------------------|--------------------|---------|--------------------|---------|--------------------|---------|----------------|----------|----------|---------|---------|---------|----------|---------|-------------|-------------|
| 300                 | 0.017              | 116.63042          | 1.07884 | 3.04818            | 0.03643 | 0.34128            | 0.00573 | 86.27485       | 1.28864  | 5.60506  | 0.06713 | 0.01198 | 0.00135 | 16.03816 | 1.52671 | 71.29       | 6.65        |
| 600                 | 0.0796             | 63.74842           | 0.26131 | 3.05069            | 0.01535 | 0.11545            | 0.00156 | 53.14778       | 0.69786  | 5.60969  | 0.02828 | 0.0038  | 0.00023 | 29.91812 | 0.46702 | 130.79      | 1.97        |
| 900                 | 0.2175             | 58.70877           | 0.14262 | 3.75515            | 0.01004 | 0.09268            | 0.00088 | 46.1453        | 0.42865  | 6.90851  | 0.01853 | 0.00112 | 0.00021 | 31.6855  | 0.26418 | 138.23      | 1.11        |
| 1200                | 0.4131             | 45.18753           | 0.07282 | 3.49535            | 0.00728 | 0.05598            | 0.00076 | 35.99627       | 0.49336  | 6.42935  | 0.01342 | 0.00106 | 0.00019 | 28.97426 | 0.22935 | 126.8       | 0.97        |
| 1500                | 0.566              | 37.06831           | 0.12908 | 3.09833            | 0.01151 | 0.03232            | 0.00091 | 25.09757       | 0.71798  | 5.69747  | 0.0212  | 0.00247 | 0.00031 | 27.8037  | 0.28495 | 121.85      | 1.21        |
| 2000                | 0.7326             | 33.84054           | 0.09826 | 2.8025             | 0.00892 | 0.02169            | 0.00061 | 18.26926       | 0.52727  | 5.15239  | 0.01642 | 0.00501 | 0.00022 | 27.6887  | 0.19637 | 121.36      | 0.83        |
| 2500                | 0.8531             | 31.3775            | 0.12668 | 3.60406            | 0.02168 | 0.01294            | 0.00219 | 11.24911       | 2.06732  | 6.62983  | 0.03999 | 0.01243 | 0.00062 | 27.89251 | 0.65955 | 122.23      | 2.79        |
| 3000                | 0.8878             | 32.59784           | 0.90653 | 7.89606            | 0.23059 | -0.00333           | 0.02731 | -5.02389       | 24.77558 | 14.56943 | 0.42786 | 0.02058 | 0.00541 | 34.39631 | 8.17085 | 149.57      | 34.1        |
| 4000                | 0.9146             | 34.10563           | 0.50441 | 9.79035            | 0.13505 | 0.05792            | 0.03239 | 47.85421       | 28.08497 | 18.08901 | 0.25126 | 0.01108 | 0.00466 | 17.89298 | 9.6428  | 79.36       | 41.84       |
| 5000                | 0.9425             | 31.98851           | 0.3047  | 11.1918            | 0.10583 | 0.01355            | 0.00908 | 9.64223        | 8.39153  | 20.69901 | 0.19729 | 0.01929 | 0.00096 | 29.10754 | 2.71821 | 127.37      | 11.48       |
| 9000                | 1                  | 31.89398           | 0.25329 | 10.93479           | 0.09481 | 0.01532            | 0.00435 | 11.37546       | 4.03008  | 20.21998 | 0.17668 | 0.01893 | 0.00046 | 28.45955 | 1.31541 | 124.63      | 5.57        |
| Integrated          |                    | 42.7616            | 0.06595 | 4.30086            | 0.00851 | 0.04956            | 0.00139 | 33.44268       | 0.96225  | 7.91552  | 0.01572 | 0.00615 | 0.00025 | 28.52791 | 0.41501 | 124.92      | 2.22        |

Whole-rock lava sample 16JT02LA at Beaver Lake

16JT02LA WR#L1

Weighted average of J from standards = 4.945e-03 +/- 1.594e-05

| Laser Power<br>(mW) | Cumulative<br>39Ar | 40Ar/39Ar<br>meas. | +/-     | 37Ar/39Ar<br>meas. | +/-     | 36Ar/39Ar<br>meas. | +/-     | % Atm.<br>40Ar | +/-     | Ca/K    | +/-     | Cl/K    | +/-     | 40*/39K  | +/-     | Age<br>(Ma) | +/-<br>(Ma) |
|---------------------|--------------------|--------------------|---------|--------------------|---------|--------------------|---------|----------------|---------|---------|---------|---------|---------|----------|---------|-------------|-------------|
| 500                 | 0.0161             | 368.85024          | 2.36381 | 1.26562            | 0.01081 | 1.14781            | 0.01441 | 91.93492       | 0.99762 | 2.32431 | 0.01987 | 0.00796 | 0.00083 | 29.77229 | 3.68917 | 247.49      | 28.65       |
| 1000                | 0.0557             | 45.81397           | 0.13622 | 1.56909            | 0.01681 | 0.10878            | 0.00193 | 69.92421       | 1.22883 | 2.88225 | 0.03092 | 0.00284 | 0.00019 | 13.78527 | 0.56544 | 118.83      | 4.72        |
| 1500                | 0.1535             | 24.10583           | 0.0821  | 2.4808             | 0.01855 | 0.03615            | 0.00048 | 43.51583       | 0.5653  | 4.55991 | 0.03415 | 0.00121 | 0.00009 | 13.6231  | 0.14466 | 117.47      | 1.21        |
| 2000                | 0.3363             | 16.66647           | 0.05229 | 1.00173            | 0.00729 | 0.00976            | 0.00022 | 16.83659       | 0.39236 | 1.83934 | 0.01339 | 0.00121 | 0.00005 | 13.84551 | 0.0788  | 119.33      | 0.66        |
| 2500                | 0.5177             | 15.34963           | 0.05104 | 0.50242            | 0.00311 | 0.00478            | 0.00018 | 8.94951        | 0.35087 | 0.92221 | 0.00571 | 0.00366 | 0.00006 | 13.95383 | 0.07145 | 120.23      | 0.6         |
| 3000                | 0.6456             | 15.2289            | 0.03942 | 0.57689            | 0.00421 | 0.0045             | 0.0002  | 8.44231        | 0.38699 | 1.05895 | 0.00773 | 0.00767 | 0.00009 | 13.92172 | 0.06917 | 119.97      | 0.58        |
| 5000                | 0.8869             | 15.16836           | 0.04014 | 0.61026            | 0.00469 | 0.00538            | 0.00015 | 10.16153       | 0.29919 | 1.12023 | 0.00861 | 0.00818 | 0.00007 | 13.60622 | 0.05814 | 117.33      | 0.49        |
| 9000                | 1                  | 15.91953           | 0.05606 | 0.65533            | 0.00644 | 0.00861            | 0.0003  | 15.6722        | 0.54899 | 1.20299 | 0.01183 | 0.00644 | 0.00011 | 13.40576 | 0.09946 | 115.66      | 0.83        |
| Integrated          |                    | 23.35747           | 0.02845 | 0.8948             | 0.00278 | 0.03185            | 0.00023 | 40.02392       | 0.29361 | 1.64287 | 0.00511 | 0.00493 | 0.00003 | 13.99994 | 0.07081 | 120.62      | 0.7         |

Whole-rock lava sample 16JT07LA at Beaver Lake

16JT07LA WR#L1

Weighted average of J from standards = 4.945e-03 +/- 1.594e-05

| Laser Power<br>(mW) | Cumulative<br>39Ar | 40Ar/39Ar<br>meas. | +/-     | 37Ar/39Ar<br>meas. | +/-     | 36Ar/39Ar<br>meas. | +/-     | % Atm.<br>40Ar | +/-     | Ca/K    | +/-     | Cl/K    | +/-     | 40*/39K  | +/-     | Age<br>(Ma) | +/-<br>(Ma) |
|---------------------|--------------------|--------------------|---------|--------------------|---------|--------------------|---------|----------------|---------|---------|---------|---------|---------|----------|---------|-------------|-------------|
| 500                 | 0.0183             | 158.72838          | 0.80466 | 1.38813            | 0.01103 | 0.48092            | 0.00635 | 89.47594       | 1.10108 | 2.54953 | 0.02028 | 0.00821 | 0.00048 | 16.71793 | 1.75292 | 143.13      | 14.43       |
| 1000                | 0.0684             | 43.34693           | 0.22272 | 1.06161            | 0.00819 | 0.09958            | 0.00167 | 67.72797       | 1.08915 | 1.94937 | 0.01505 | 0.00456 | 0.00017 | 13.98984 | 0.47928 | 120.53      | 3.99        |
| 1500                | 0.1949             | 23.32685           | 0.07983 | 0.92945            | 0.00815 | 0.02993            | 0.00051 | 37.62995       | 0.63237 | 1.70653 | 0.01497 | 0.00149 | 0.00007 | 14.54    | 0.15668 | 125.11      | 1.3         |
| 2000                | 0.3657             | 15.97229           | 0.07108 | 0.33953            | 0.00332 | 0.00729            | 0.00018 | 13.33049       | 0.32419 | 0.62314 | 0.0061  | 0.00189 | 0.00003 | 13.82068 | 0.08093 | 119.12      | 0.67        |
| 2500                | 0.5048             | 15.41962           | 0.06302 | 0.25353            | 0.0031  | 0.00596            | 0.00018 | 11.30941       | 0.33765 | 0.46527 | 0.00569 | 0.00517 | 0.00007 | 13.65186 | 0.07654 | 117.71      | 0.64        |
| 3000                | 0.6151             | 14.95496           | 0.0581  | 0.37966            | 0.00328 | 0.00474            | 0.00016 | 9.16584        | 0.31765 | 0.69682 | 0.00602 | 0.00777 | 0.00009 | 13.56087 | 0.07127 | 116.96      | 0.6         |
| 5000                | 0.8409             | 15.21477           | 0.05374 | 0.425              | 0.00302 | 0.00605            | 0.00014 | 11.53318       | 0.26286 | 0.78004 | 0.00554 | 0.00764 | 0.00006 | 13.43779 | 0.0626  | 115.93      | 0.52        |
| 9000                | 1                  | 15.16727           | 0.04517 | 0.2845             | 0.00224 | 0.00631            | 0.00011 | 12.16434       | 0.21015 | 0.52212 | 0.00411 | 0.0046  | 0.00007 | 13.29886 | 0.0515  | 114.77      | 0.43        |
| Integrated          |                    | 20.39728           | 0.03017 | 0.47256            | 0.00158 | 0.02254            | 0.00016 | 32.50634       | 0.22948 | 0.86738 | 0.0029  | 0.00492 | 0.00003 | 13.75142 | 0.0513  | 118.55      | 0.57        |

Whole-rock lava sample 16JT16LA at Beaver Lake

16JT16LA WR#L1

Weighted average of J from standards = 4.945e-03 +/- 1.594e-05

| Laser Power<br>(mW) | Cumulative<br>39Ar | 40Ar/39Ar<br>meas. | +/-     | 37Ar/39Ar<br>meas. | +/-     | 36Ar/39Ar<br>meas. | +/-     | % Atm.<br>40Ar | +/-     | Ca/K     | +/-     | Cl/K    | +/-     | 40*/39K  | +/-     | Age<br>(Ma) | +/-<br>(Ma) |
|---------------------|--------------------|--------------------|---------|--------------------|---------|--------------------|---------|----------------|---------|----------|---------|---------|---------|----------|---------|-------------|-------------|
| 500                 | 0.064              | 163.15888          | 0.9844  | 2.26666            | 0.0167  | 0.4984             | 0.00647 | 90.16856       | 1.0416  | 4.16567  | 0.03073 | 0.01244 | 0.00033 | 16.06367 | 1.70532 | 137.73      | 14.08       |
| 750                 | 0.1528             | 38.08843           | 0.14523 | 1.95588            | 0.01546 | 0.08288            | 0.00181 | 63.92501       | 1.38395 | 3.59373  | 0.02845 | 0.00177 | 0.0002  | 13.74869 | 0.53064 | 118.52      | 4.43        |
| 1000                | 0.292              | 31.29128           | 0.09728 | 2.19307            | 0.0136  | 0.05841            | 0.00065 | 54.63669       | 0.59616 | 4.03022  | 0.02503 | 0.00114 | 0.00014 | 14.20331 | 0.19291 | 122.31      | 1.61        |
| 1250                | 0.441              | 30.20406           | 0.10838 | 3.6119             | 0.02367 | 0.05568            | 0.00093 | 53.54479       | 0.89258 | 6.64429  | 0.04365 | 0.00119 | 0.00011 | 14.05345 | 0.27493 | 121.06      | 2.29        |
| 1500                | 0.5256             | 38.15878           | 0.17814 | 11.86837           | 0.0912  | 0.08727            | 0.00159 | 65.06815       | 1.19445 | 21.96089 | 0.17018 | 0.00234 | 0.00025 | 13.43186 | 0.46406 | 115.88      | 3.88        |
| 3000                | 0.6377             | 61.9811            | 0.29539 | 26.20472           | 0.2002  | 0.16897            | 0.00218 | 77.10859       | 0.96692 | 48.98864 | 0.38132 | 0.01697 | 0.00028 | 14.44907 | 0.61505 | 124.36      | 5.11        |
| 4000                | 0.7434             | 37.38699           | 0.15979 | 3.56945            | 0.02473 | 0.08226            | 0.00108 | 64.27844       | 0.80946 | 6.56601  | 0.0456  | 0.06759 | 0.00042 | 13.37836 | 0.3089  | 115.43      | 2.58        |

|            |        |          |         |         |         |         |         |          |         |          |         |         |         |          |         |        |      |
|------------|--------|----------|---------|---------|---------|---------|---------|----------|---------|----------|---------|---------|---------|----------|---------|--------|------|
| 5000       | 0.8637 | 30.07428 | 0.105   | 5.29791 | 0.0326  | 0.0616  | 0.00088 | 59.13007 | 0.84901 | 9.75745  | 0.06027 | 0.05546 | 0.00032 | 12.32536 | 0.26068 | 106.61 | 2.19 |
| 6000       | 0.9104 | 40.46402 | 0.14573 | 6.86003 | 0.03963 | 0.09526 | 0.0022  | 68.21562 | 1.58513 | 12.64849 | 0.07343 | 0.04352 | 0.0006  | 12.91441 | 0.64589 | 111.55 | 5.41 |
| 9000       | 1      | 46.90902 | 0.19028 | 8.34676 | 0.05952 | 0.11567 | 0.00205 | 71.44465 | 1.26006 | 15.40598 | 0.1105  | 0.0476  | 0.00054 | 13.46598 | 0.59695 | 116.16 | 4.99 |
| Integrated |        | 46.53647 | 0.06106 | 7.22503 | 0.02225 | 0.113   | 0.00058 | 70.51576 | 0.35953 | 13.32493 | 0.04124 | 0.0235  | 0.00009 | 13.78254 | 0.16923 | 118.81 | 1.46 |

Whole-rock intrusion sample 16JT09LA at Beaver Lake

16JT09LA WR#L1

Weighted average of J from standards = 4.945e-03 +/- 1.594e-05

| Laser Power<br>(mW) | Cumulative<br>39Ar | 40Ar/39Ar<br>meas. | +/-     | 37Ar/39Ar<br>meas. | +/-     | 36Ar/39Ar<br>meas. | +/-     | % Atm.<br>40Ar | +/-     | Ca/K    | +/-     | Cl/K    | +/-     | 40*/39K  | +/-     | Age<br>(Ma) | +/-<br>(Ma) |
|---------------------|--------------------|--------------------|---------|--------------------|---------|--------------------|---------|----------------|---------|---------|---------|---------|---------|----------|---------|-------------|-------------|
| 500                 | 0.0306             | 77.51841           | 0.23038 | 0.47079            | 0.00299 | 0.21838            | 0.00184 | 83.22758       | 0.66777 | 0.86412 | 0.00549 | 0.00206 | 0.00017 | 13.00106 | 0.52064 | 112.27      | 4.36        |
| 1000                | 0.1623             | 23.57086           | 0.07293 | 0.36914            | 0.00315 | 0.03425            | 0.00058 | 42.86224       | 0.7169  | 0.67751 | 0.00579 | 0.00053 | 0.00006 | 13.4544  | 0.17464 | 116.07      | 1.46        |
| 1500                | 0.3133             | 19.58875           | 0.0721  | 0.59852            | 0.00446 | 0.01857            | 0.00031 | 27.80736       | 0.4561  | 1.09866 | 0.00819 | 0.00025 | 0.00006 | 14.12617 | 0.10407 | 121.67      | 0.87        |
| 2000                | 0.3934             | 16.4981            | 0.06175 | 1.02935            | 0.00897 | 0.01032            | 0.00029 | 18.01125       | 0.51081 | 1.89009 | 0.01648 | 0.00033 | 0.00006 | 13.51208 | 0.09875 | 116.55      | 0.82        |
| 2500                | 0.4545             | 15.88039           | 0.07249 | 0.66134            | 0.00615 | 0.00808            | 0.0004  | 14.71168       | 0.74805 | 1.21404 | 0.0113  | 0.00062 | 0.00007 | 13.52511 | 0.13403 | 116.66      | 1.12        |
| 3000                | 0.5211             | 15.0764            | 0.05776 | 0.31322            | 0.00176 | 0.0053             | 0.00028 | 10.24492       | 0.54699 | 0.57484 | 0.00323 | 0.00091 | 0.00005 | 13.50817 | 0.09742 | 116.51      | 0.81        |
| 5000                | 0.8583             | 16.55047           | 0.04581 | 0.59119            | 0.00401 | 0.01018            | 0.00023 | 17.91279       | 0.41314 | 1.0852  | 0.00737 | 0.0019  | 0.00002 | 13.56712 | 0.07846 | 117.01      | 0.66        |
| 9000                | 1                  | 26.49803           | 0.1051  | 1.92275            | 0.01679 | 0.04283            | 0.00086 | 47.21772       | 0.9474  | 3.53278 | 0.03088 | 0.00341 | 0.00009 | 13.9896  | 0.25785 | 120.53      | 2.15        |
| Integrated          |                    | 21.06634           | 0.02889 | 0.76917            | 0.00287 | 0.02517            | 0.00018 | 35.06147       | 0.25364 | 1.4121  | 0.00526 | 0.00142 | 0.00002 | 13.66832 | 0.05688 | 117.85      | 0.6         |

Whole-rock intrusion sample 16JT25LA at Beaver Lake

16JT25LA WR#L1

Weighted average of J from standards = 4.945e-03 +/- 1.594e-05

| Laser Power<br>(mW) | Cumulative<br>39Ar | 40Ar/39Ar<br>meas. | +/-     | 37Ar/39Ar<br>meas. | +/-     | 36Ar/39Ar<br>meas. | +/-     | % Atm.<br>40Ar | +/-     | Ca/K    | +/-     | Cl/K    | +/-     | 40*/39K  | +/-     | Age<br>(Ma) | +/-<br>(Ma) |
|---------------------|--------------------|--------------------|---------|--------------------|---------|--------------------|---------|----------------|---------|---------|---------|---------|---------|----------|---------|-------------|-------------|
| 500                 | 0.071              | 35.29187           | 0.10274 | 0.46032            | 0.00309 | 0.08119            | 0.00109 | 67.92941       | 0.89195 | 0.8449  | 0.00567 | 0.0013  | 0.00039 | 11.31247 | 0.31679 | 98.08       | 2.67        |
| 1000                | 0.3372             | 20.19481           | 0.07233 | 0.6862             | 0.00551 | 0.02111            | 0.00033 | 30.65114       | 0.47681 | 1.2597  | 0.01013 | 0.00045 | 0.00011 | 13.99106 | 0.10909 | 120.54      | 0.91        |
| 1500                | 0.5541             | 18.0062            | 0.04075 | 2.4431             | 0.0199  | 0.01344            | 0.00027 | 20.96564       | 0.43538 | 4.4905  | 0.03664 | 0.00035 | 0.00013 | 14.23221 | 0.08526 | 122.55      | 0.71        |
| 2000                | 0.6119             | 19.92538           | 0.03697 | 1.93262            | 0.01321 | 0.02148            | 0.00113 | 31.09799       | 1.67284 | 3.55095 | 0.0243  | 0.00094 | 0.00047 | 13.72729 | 0.33438 | 118.34      | 2.79        |
| 2500                | 0.6475             | 18.70293           | 0.07648 | 0.78311            | 0.01117 | 0.0178             | 0.00104 | 27.81515       | 1.63711 | 1.43769 | 0.02053 | 0.00163 | 0.00076 | 13.48672 | 0.31135 | 116.34      | 2.6         |
| 3000                | 0.7006             | 16.3233            | 0.06891 | 0.63658            | 0.0058  | 0.00904            | 0.00073 | 16.07917       | 1.32652 | 1.16857 | 0.01066 | 0.00173 | 0.00051 | 13.67989 | 0.22431 | 117.95      | 1.87        |
| 5000                | 0.904              | 17.18803           | 0.04596 | 0.76644            | 0.00484 | 0.01278            | 0.00032 | 21.64884       | 0.5419  | 1.40707 | 0.00889 | 0.00211 | 0.00015 | 13.45104 | 0.10023 | 116.04      | 0.84        |
| 9000                | 1                  | 25.88184           | 0.10774 | 1.60063            | 0.01316 | 0.04155            | 0.00063 | 46.98359       | 0.69524 | 2.94025 | 0.0242  | 0.00982 | 0.00034 | 13.72141 | 0.18913 | 118.3       | 1.58        |
| Integrated          |                    | 20.45057           | 0.02678 | 1.22852            | 0.00494 | 0.02324            | 0.00018 | 33.12738       | 0.25527 | 2.25612 | 0.00908 | 0.00186 | 0.00008 | 13.66784 | 0.05538 | 117.85      | 0.59        |

Feldspars from dike sample 01TOT along Totshunda fault

01TOT FS#11

Weighted average of J from standards = 4.311e-03 +/- 2.840e-05

| Laser Power<br>(mW) | Cumulative<br>39Ar | 40Ar/39Ar<br>meas. | +/-     | 37Ar/39Ar<br>meas. | +/-     | 36Ar/39Ar<br>meas. | +/-     | % Atm.<br>40Ar | +/-     | Ca/K    | +/-     | Cl/K    | +/-     | 40*/39K  | +/-     | Age<br>(Ma) | +/-<br>(Ma) |
|---------------------|--------------------|--------------------|---------|--------------------|---------|--------------------|---------|----------------|---------|---------|---------|---------|---------|----------|---------|-------------|-------------|
| 400                 | 0.0042             | 294.24242          | 4.1907  | 0.01898            | 0.00297 | 0.9383             | 0.01482 | 94.23998       | 1.04762 | 0.03483 | 0.00546 | 0.01877 | 0.0007  | 16.94694 | 3.14957 | 127.08      | 22.8        |
| 600                 | 0.0129             | 47.6304            | 0.84794 | 0.02043            | 0.00097 | 0.11561            | 0.0021  | 71.76764       | 1.39456 | 0.03748 | 0.00178 | 0.00289 | 0.00014 | 13.439   | 0.81576 | 101.5       | 5.99        |
| 800                 | 0.0242             | 28.22641           | 0.53484 | 0.05545            | 0.00159 | 0.04654            | 0.00104 | 48.75964       | 1.0298  | 0.10175 | 0.00291 | 0.00177 | 0.00019 | 14.44866 | 0.46999 | 108.9       | 3.44        |
| 1000                | 0.0377             | 21.18803           | 0.39582 | 0.12667            | 0.00243 | 0.02257            | 0.0006  | 31.4716        | 0.80672 | 0.23245 | 0.00447 | 0.00157 | 0.00012 | 14.50076 | 0.36135 | 109.28      | 2.64        |
| 1300                | 0.0602             | 20.11825           | 0.39024 | 0.04871            | 0.00089 | 0.01763            | 0.00036 | 25.91621       | 0.50646 | 0.08937 | 0.00164 | 0.00009 | 0.00009 | 14.88287 | 0.34775 | 112.07      | 2.54        |
| 1600                | 0.0816             | 18.91943           | 0.34491 | 0.01323            | 0.00041 | 0.01463            | 0.0004  | 22.87691       | 0.63678 | 0.02427 | 0.00075 | 0.0005  | 0.00008 | 14.56848 | 0.32749 | 109.77      | 2.39        |
| 2000                | 0.105              | 16.61168           | 0.32791 | 0.01189            | 0.00049 | 0.0064             | 0.00027 | 11.3929        | 0.48113 | 0.02182 | 0.00089 | 0.00041 | 0.00007 | 14.69294 | 0.31625 | 110.68      | 2.31        |
| 2500                | 0.1373             | 16.6532            | 0.32785 | 0.01043            | 0.00031 | 0.00693            | 0.00024 | 12.30696       | 0.4226  | 0.01914 | 0.00057 | 0.00056 | 0.00007 | 14.57776 | 0.31416 | 109.84      | 2.3         |
| 3000                | 0.1776             | 16.42056           | 0.32417 | 0.01056            | 0.0004  | 0.00516            | 0.00024 | 9.30334        | 0.44078 | 0.01938 | 0.00074 | 0.00048 | 0.00006 | 14.86608 | 0.31735 | 111.95      | 2.32        |
| 4000                | 0.2782             | 16.91129           | 0.25203 | 0.00975            | 0.00019 | 0.00628            | 0.00011 | 10.99507       | 0.1486  | 0.0179  | 0.00034 | 0.00067 | 0.00005 | 15.02555 | 0.23045 | 113.11      | 1.68        |
| 5000                | 0.3805             | 16.67432           | 0.24554 | 0.00656            | 0.00016 | 0.00529            | 0.00011 | 9.39143        | 0.15174 | 0.01204 | 0.0003  | 0.00061 | 0.00005 | 15.08152 | 0.22795 | 113.52      | 1.66        |
| 6000                | 0.4617             | 17.16052           | 0.25233 | 0.00693            | 0.00019 | 0.0067             | 0.00016 | 11.54759       | 0.24085 | 0.01272 | 0.00034 | 0.00058 | 0.00006 | 15.1527  | 0.23205 | 114.04      | 1.69        |
| 9000                | 0.4984             | 16.88583           | 0.33831 | 0.0084             | 0.00027 | 0.00676            | 0.00022 | 11.84291       | 0.38381 | 0.01541 | 0.00049 | 0.00059 | 0.00006 | 14.85996 | 0.32322 | 111.9       | 2.36        |
| 9001                | 1                  | 17.46899           | 0.23995 | 0.00527            | 0.0001  | 0.00721            | 0.00011 | 12.21871       | 0.13872 | 0.00968 | 0.00018 | 0.00057 | 0.00005 | 15.30849 | 0.21784 | 115.17      | 1.59        |
| Integrated          |                    | 18.89469           | 0.13908 | 0.01018            | 0.00009 | 0.01269            | 0.0001  | 19.87009       | 0.11147 | 0.01869 | 0.00016 | 0.00072 | 0.00003 | 15.11661 | 0.11843 | 113.77      | 1.13        |

Amphiboles from sandstone sample WP87 at Euchre Mountain

UAF180-18 EUCHER HO#DETRITAL 1-121 10-13A16 LOST ARC

Weighted average of J from standards = 4.263e-03 +/- 1.092e-05

| Amphibole<br>grain number | Cumulative<br>39Ar | 40Ar/39Ar<br>meas. | +/-     | 37Ar/39Ar<br>meas. | +/-     | 36Ar/39Ar<br>meas. | +/-     | % Atm.<br>40Ar | +/-     | Ca/K      | +/-     | Cl/K    | +/-     | 40*/39K  | +/-     | Age<br>(Ma) | +/-<br>(Ma) | % error<br>(Ma) |
|---------------------------|--------------------|--------------------|---------|--------------------|---------|--------------------|---------|----------------|---------|-----------|---------|---------|---------|----------|---------|-------------|-------------|-----------------|
| 1                         | 0.5668             | 17.51334           | 0.08862 | 0.33428            | 0.00283 | 0.0087             | 0.00027 | 14.53942       | 0.46444 | 0.6135    | 0.00519 | 0.00395 | 0.00006 | 14.94516 | 0.11559 | 111.31      | 0.83        | 0.75            |
| 2                         | 0.8958             | 16.72951           | 0.10779 | 6.92554            | 0.04657 | 0.00289            | 0.0014  | 1.70277        | 2.4803  | 12.76988  | 0.0863  | 0.0369  | 0.00056 | 16.49628 | 0.42982 | 122.48      | 3.09        | 2.52            |
| 3                         | 0.6499             | 18.39467           | 0.09113 | 7.02899            | 0.05232 | 0.014              | 0.00152 | 19.37191       | 2.44032 | 12.96157  | 0.09696 | 0.04309 | 0.00048 | 14.88132 | 0.45705 | 110.85      | 3.3         | 2.98            |
| 4                         | 0.7823             | 17.64095           | 0.11002 | 8.90478            | 0.06119 | 0.00445            | 0.002   | 3.29899        | 3.36179 | 16.44244  | 0.11371 | 0.06148 | 0.00069 | 17.13821 | 0.60567 | 127.08      | 4.34        | 3.42            |
| 5                         | 0.9788             | 16.29099           | 0.07377 | 3.76757            | 0.02947 | 0.00621            | 0.00248 | 9.36865        | 4.50511 | 6.93142   | 0.05437 | 0.14156 | 0.00168 | 14.77722 | 0.73791 | 110.1       | 5.33        | 4.84            |
| 6                         | 0.7182             | 22.4462            | 0.1565  | 61.08818           | 0.49705 | 0.04226            | 0.00417 | 33.2406        | 5.48314 | 117.14208 | 0.99611 | 0.00675 | 0.00093 | 15.64074 | 1.29041 | 116.33      | 9.29        | 7.99            |
| 7                         | 0.8313             | 31.23936           | 0.3747  | 7.4583             | 0.1111  | 0.05087            | 0.00475 | 46.19608       | 4.46266 | 13.75741  | 0.20601 | 0.11104 | 0.00215 | 16.88102 | 1.41572 | 125.24      | 10.15       | 8.10            |

Note: errors are 1 sigma
