# Supplementary material
Source: publisher figshare collection journal article supplement (https://gsapubs.figshare.com/ndownloader/files/22411878)
Supplement: Supplementary file 2 [file 22411878]

**Data Repository Item A - Sample location information**

| Sample name                                                                  | General location               | Lat (°N)  | Long (°W)  | Notes                                                                  | Analysis                                      |
|------------------------------------------------------------------------------|--------------------------------|-----------|------------|------------------------------------------------------------------------|-----------------------------------------------|
| <b><i>Beaver Lake Fm. sandstone and mudstone</i></b>                         |                                |           |            |                                                                        |                                               |
| 16JT03LA                                                                     | Hillslope east of Beaver Lake  | 62.028750 | 141.811944 | Massive lithic sandstone on hillslope                                  | Detrital zircon U-Pb geochron.                |
| 16JT13LA                                                                     | Hillslope north of Beaver Lake | 62.051583 | 141.771666 | Cross-stratified lithic sandstone in streamcut                         | Detrital zircon U-Pb geochron.                |
| 16JT12LA                                                                     | Hillslope north of Beaver Lake | 62.060555 | 141.782500 | Carbonaceous mudstone exposed near poorly exposed tuff                 | Palynology and paleobotany                    |
| 16JT14LA                                                                     | Hillslope north of Beaver Lake | 62.049444 | 141.739722 | Carbonaceous mudstone                                                  | Palynology                                    |
| 16JT17-A, B                                                                  | Hillslope north of Beaver Lake | 62.054361 | 141.741666 | Carbonaceous mudstone exposed within measured section                  | Paleobotany                                   |
| WP87-M                                                                       | Southwest flank of Euchre Mtn. | 62.040286 | 142.216613 | Thin mudstone within lowermost massive green-buff sandstones           | Palynology                                    |
| WP87-SS                                                                      | Southwest flank of Euchre Mtn. | 62.040346 | 142.216504 | Lowermost green-buff massive sandstones                                | Detrital zircon geochron.                     |
| WP87-TS                                                                      | Southwest flank of Euchre Mtn. | 62.040284 | 142.216613 | Light grey tuffaceous very-fine-grained sandstone and siltstone        | Detrital zircon U-Pb geochron.                |
| WP97                                                                         | Southwest flank of Euchre Mtn. | 62.030055 | 142.172222 | Carbonaceous mudstone exposed within lithic sandstone succession       | Paleobotany                                   |
| <b><i>Intrusions in lower Beaver Lake Fm. sandstone and conglomerate</i></b> |                                |           |            |                                                                        |                                               |
| 16JT09LA                                                                     | Hillslope north of Beaver Lake | 62.054694 | 141.786389 | Subhorizontal mafic intrusion in sandstone/mudstone                    | $^{40}\text{Ar}/^{39}\text{Ar}$ geochronology |
| 16JT25LA                                                                     | Hillslope north of Beaver Lake | 62.630556 | 141.786111 | Subvertical mafic intrusion in basal conglomerate                      | $^{40}\text{Ar}/^{39}\text{Ar}$ geochronology |
| <b><i>Chisana Formation lavas</i></b>                                        |                                |           |            |                                                                        |                                               |
| CHI-1232                                                                     | Bonanza Creek Canyon           | 62.095380 | 141.843800 | Massive andesite flow exposed along Bonanza Creek                      | $^{40}\text{Ar}/^{39}\text{Ar}$ geochronology |
| CHI-1438                                                                     | Bonanza Creek Canyon           | 62.091330 | 141.849070 | Massive andesite flow exposed along Bonanza Creek                      | $^{40}\text{Ar}/^{39}\text{Ar}$ geochronology |
| 16JT02LA                                                                     | Hillslope east of Beaver Lake  | 62.028833 | 141.812222 | Andesite lava exposed 3 m below basal conglomerate                     | $^{40}\text{Ar}/^{39}\text{Ar}$ geochronology |
| 16JT07LA                                                                     | Hillslope east of Beaver Lake  | 62.054083 | 141.786666 | Andesite lava exposed immediately below basal conglomerate             | $^{40}\text{Ar}/^{39}\text{Ar}$ geochronology |
| 16JT16LA                                                                     | Hillslope north of Beaver Lake | 62.052778 | 141.740833 | Andesite lava exposed immediately below basal conglomerate             | $^{40}\text{Ar}/^{39}\text{Ar}$ geochronology |
| <b><i>Dike intruding Totshunda Fault zone</i></b>                            |                                |           |            |                                                                        |                                               |
| 01TOT                                                                        | Cooper Pass                    | 62.264230 | 142.522190 | Feldspar dike intruding Nabesna pluton <0.5 km west of Totshunda fault | $^{40}\text{Ar}/^{39}\text{Ar}$ geochronology |

Note: datum WGS84 for all samples
