# Supplementary material
Source: publisher figshare collection journal article supplement (https://gsapubs.figshare.com/ndownloader/files/22411878)
Supplement: Supplementary file 3 [file 22411878]

Archive with 4 entries (4 files):
- Supplemental Material A.pdf
- Supplemental Material B.pdf
- Supplemental Material C.pdf
- Supplemental Material D.pdf
