# Supplementary material
Source: publisher figshare collection journal article supplement (https://gsapubs.figshare.com/ndownloader/files/22411878)
Supplement: Supplementary file 3 [file 22411878 › Supplemental Material D.pdf]

**Data Repository Item D** – Analytical results from detrital zircons from Beaver Lake  
Formation sandstones and nearby modern rivers

Data Repository Item DRD - U-Pb zircon geochronologic analyses for Beaver Lake Formation sandstones and modern rivers near Beaver Lake

|                                                                          |       |         |      |         |     | Isotope ratios |     |        |     |       |        | Apparent ages (Ma) |        |      |        |      |          |      |  |
|--------------------------------------------------------------------------|-------|---------|------|---------|-----|----------------|-----|--------|-----|-------|--------|--------------------|--------|------|--------|------|----------|------|--|
| Analysis                                                                 | U     | 206Pb   | U/Th | 206Pb*  | ±   | 207Pb*         | ±   | 206Pb* | ±   | error | 206Pb* | ±                  | 207Pb* | ±    | 206Pb* | ±    | Best age | ±    |  |
|                                                                          | (ppm) | 204Pb   |      | 207Pb*  | (%) | 235U*          | (%) | 238U   | (%) | corr. | 238U*  | (Ma)               | 235U   | (Ma) | 207Pb* | (Ma) | (Ma)     | (Ma) |  |
| WP87-T (Beaver Lake Formation tuffaceous siltstone from Eucher Mountain) |       |         |      |         |     |                |     |        |     |       |        |                    |        |      |        |      |          |      |  |
| WP87-T Spot 282                                                          | 515   | 24039   | 0.9  | 20.5697 | 1.3 | 0.1204         | 2.0 | 0.0180 | 1.6 | 0.78  | 114.8  | 1.8                | 115.4  | 2.2  | 128.3  | 29.9 | 114.8    | 1.8  |  |
| WP87-T Spot 128                                                          | 137   | 12766   | 3.3  | 20.1864 | 2.1 | 0.1263         | 3.0 | 0.0185 | 2.0 | 0.69  | 118.1  | 2.4                | 120.7  | 3.4  | 172.3  | 50.0 | 118.1    | 2.4  |  |
| WP87-T Spot 177                                                          | 128   | 5818    | 2.6  | 20.2817 | 2.6 | 0.1258         | 3.2 | 0.0185 | 1.9 | 0.59  | 118.2  | 2.2                | 120.3  | 3.6  | 161.4  | 60.6 | 118.2    | 2.2  |  |
| WP87-T Spot 297                                                          | 477   | 76605   | 1.3  | 19.8708 | 1.2 | 0.1288         | 2.1 | 0.0186 | 1.7 | 0.80  | 118.6  | 1.9                | 123.0  | 2.4  | 209.0  | 28.6 | 118.6    | 1.9  |  |
| WP87-T Spot 94                                                           | 156   | 4567    | 3.1  | 21.6034 | 2.4 | 0.1186         | 2.9 | 0.0186 | 1.6 | 0.55  | 118.8  | 1.9                | 113.8  | 3.1  | 11.6   | 58.6 | 118.8    | 1.9  |  |
| WP87-T Spot 97                                                           | 398   | 15543   | 1.3  | 20.6423 | 1.6 | 0.1242         | 2.6 | 0.0186 | 2.1 | 0.81  | 118.8  | 2.5                | 118.8  | 2.9  | 120.0  | 36.7 | 118.8    | 2.5  |  |
| WP87-T Spot 90                                                           | 507   | 47327   | 1.8  | 20.8126 | 1.3 | 0.1232         | 2.2 | 0.0186 | 1.7 | 0.80  | 118.9  | 2.1                | 118.0  | 2.4  | 100.6  | 31.1 | 118.9    | 2.1  |  |
| WP87-T Spot 308                                                          | 247   | 245645  | 2.2  | 20.6801 | 1.4 | 0.1241         | 2.0 | 0.0186 | 1.5 | 0.74  | 118.9  | 1.8                | 118.8  | 2.3  | 115.7  | 31.9 | 118.9    | 1.8  |  |
| WP87-T Spot 117                                                          | 369   | 40989   | 2.1  | 20.7051 | 1.5 | 0.1240         | 2.6 | 0.0186 | 2.2 | 0.83  | 119.0  | 2.6                | 118.7  | 2.9  | 112.8  | 34.3 | 119.0    | 2.6  |  |
| WP87-T Spot 182                                                          | 366   | 473860  | 2.1  | 20.7060 | 1.1 | 0.1244         | 1.9 | 0.0187 | 1.5 | 0.80  | 119.3  | 1.8                | 119.0  | 2.1  | 112.7  | 26.7 | 119.3    | 1.8  |  |
| WP87-T Spot 306                                                          | 356   | 45134   | 2.4  | 20.3664 | 1.0 | 0.1265         | 2.0 | 0.0187 | 1.8 | 0.86  | 119.4  | 2.1                | 121.0  | 2.3  | 151.6  | 24.4 | 119.4    | 2.1  |  |
| WP87-T Spot 62                                                           | 347   | 17218   | 2.1  | 20.7904 | 1.4 | 0.1241         | 2.2 | 0.0187 | 1.8 | 0.79  | 119.6  | 2.1                | 118.8  | 2.5  | 103.1  | 32.4 | 119.6    | 2.1  |  |
| WP87-T Spot 124                                                          | 243   | 38218   | 2.2  | 19.8914 | 1.3 | 0.1298         | 2.1 | 0.0187 | 1.7 | 0.78  | 119.6  | 2.0                | 123.9  | 2.5  | 206.6  | 31.1 | 119.6    | 2.0  |  |
| WP87-T Spot 181                                                          | 328   | 18386   | 1.2  | 20.3803 | 1.9 | 0.1268         | 2.8 | 0.0188 | 2.0 | 0.74  | 119.8  | 2.4                | 121.2  | 3.2  | 150.0  | 43.9 | 119.8    | 2.4  |  |
| WP87-T Spot 292                                                          | 288   | 11621   | 2.6  | 20.4225 | 1.7 | 0.1266         | 2.2 | 0.0188 | 1.5 | 0.66  | 119.8  | 1.7                | 121.0  | 2.5  | 145.1  | 39.5 | 119.8    | 1.7  |  |
| WP87-T Spot 242                                                          | 258   | 19563   | 2.0  | 20.7372 | 1.5 | 0.1246         | 2.3 | 0.0188 | 1.7 | 0.75  | 119.8  | 2.1                | 119.3  | 2.6  | 109.2  | 35.8 | 119.8    | 2.1  |  |
| WP87-T Spot 8                                                            | 372   | 32358   | 1.7  | 20.4325 | 1.1 | 0.1267         | 2.1 | 0.0188 | 1.8 | 0.86  | 120.0  | 2.1                | 121.2  | 2.4  | 144.0  | 24.9 | 120.0    | 2.1  |  |
| WP87-T Spot 83                                                           | 256   | 81083   | 2.5  | 20.4058 | 1.5 | 0.1269         | 2.2 | 0.0188 | 1.6 | 0.72  | 120.0  | 1.9                | 121.3  | 2.5  | 147.1  | 35.9 | 120.0    | 1.9  |  |
| WP87-T Spot 73                                                           | 242   | 19348   | 2.7  | 20.7239 | 1.8 | 0.1252         | 2.0 | 0.0188 | 1.0 | 0.50  | 120.3  | 1.2                | 119.8  | 2.3  | 110.7  | 41.7 | 120.3    | 1.2  |  |
| WP87-T Spot 254                                                          | 189   | 5873    | 2.5  | 21.6662 | 1.6 | 0.1199         | 2.2 | 0.0188 | 1.5 | 0.69  | 120.4  | 1.8                | 115.0  | 2.4  | 4.7    | 38.0 | 120.4    | 1.8  |  |
| WP87-T Spot 261                                                          | 606   | 68766   | 2.3  | 20.3561 | 1.1 | 0.1276         | 2.1 | 0.0188 | 1.7 | 0.84  | 120.4  | 2.1                | 121.9  | 2.4  | 152.8  | 26.3 | 120.4    | 2.1  |  |
| WP87-T Spot 127                                                          | 141   | 5154    | 2.9  | 22.1431 | 3.8 | 0.1173         | 4.1 | 0.0189 | 1.5 | 0.37  | 120.4  | 1.8                | 112.6  | 4.4  | NA     | NA   | 120.4    | 1.8  |  |
| WP87-T Spot 139                                                          | 144   | 12244   | 3.0  | 20.6775 | 1.7 | 0.1257         | 2.2 | 0.0189 | 1.5 | 0.66  | 120.4  | 1.8                | 120.2  | 2.5  | 116.0  | 39.9 | 120.4    | 1.8  |  |
| WP87-T Spot 59                                                           | 268   | 8177    | 2.4  | 21.1846 | 1.8 | 0.1227         | 2.2 | 0.0189 | 1.4 | 0.61  | 120.4  | 1.6                | 117.5  | 2.5  | 58.5   | 42.1 | 120.4    | 1.6  |  |
| WP87-T Spot 146                                                          | 151   | 9627    | 2.6  | 21.0036 | 1.8 | 0.1238         | 2.3 | 0.0189 | 1.4 | 0.62  | 120.5  | 1.7                | 118.5  | 2.5  | 78.9   | 42.1 | 120.5    | 1.7  |  |
| WP87-T Spot 39                                                           | 456   | 15874   | 1.3  | 21.1501 | 1.2 | 0.1230         | 2.2 | 0.0189 | 1.9 | 0.85  | 120.5  | 2.2                | 117.8  | 2.5  | 62.4   | 28.0 | 120.5    | 2.2  |  |
| WP87-T Spot 93                                                           | 429   | 11878   | 1.7  | 20.9485 | 1.0 | 0.1242         | 2.1 | 0.0189 | 1.9 | 0.88  | 120.6  | 2.2                | 118.9  | 2.4  | 85.2   | 24.6 | 120.6    | 2.2  |  |
| WP87-T Spot 50                                                           | 324   | 12368   | 3.0  | 20.7969 | 1.1 | 0.1251         | 2.0 | 0.0189 | 1.7 | 0.84  | 120.6  | 2.0                | 119.7  | 2.2  | 102.4  | 25.5 | 120.6    | 2.0  |  |
| WP87-T Spot 249                                                          | 542   | 119858  | 1.2  | 20.5330 | 1.5 | 0.1268         | 2.6 | 0.0189 | 2.1 | 0.81  | 120.6  | 2.5                | 121.2  | 3.0  | 132.5  | 35.6 | 120.6    | 2.5  |  |
| WP87-T Spot 37                                                           | 241   | 19956   | 2.2  | 20.9880 | 1.7 | 0.1240         | 2.2 | 0.0189 | 1.4 | 0.65  | 120.6  | 1.7                | 118.7  | 2.5  | 80.7   | 40.5 | 120.6    | 1.7  |  |
| WP87-T Spot 262                                                          | 122   | 8104    | 3.7  | 22.3895 | 1.9 | 0.1163         | 2.4 | 0.0189 | 1.5 | 0.61  | 120.7  | 1.8                | 111.7  | 2.5  | NA     | NA   | 120.7    | 1.8  |  |
| WP87-T Spot 9                                                            | 182   | 58961   | 2.6  | 20.5924 | 1.6 | 0.1265         | 2.2 | 0.0189 | 1.5 | 0.70  | 120.7  | 1.8                | 121.0  | 2.5  | 125.7  | 36.7 | 120.7    | 1.8  |  |
| WP87-T Spot 151                                                          | 301   | 11853   | 2.4  | 20.8420 | 1.6 | 0.1251         | 2.6 | 0.0189 | 2.0 | 0.78  | 120.8  | 2.4                | 119.7  | 2.9  | 97.2   | 38.7 | 120.8    | 2.4  |  |
| WP87-T Spot 20                                                           | 209   | 9358    | 2.8  | 20.7418 | 2.0 | 0.1257         | 2.3 | 0.0189 | 1.2 | 0.51  | 120.8  | 1.4                | 120.3  | 2.6  | 108.7  | 47.4 | 120.8    | 1.4  |  |
| WP87-T Spot 303                                                          | 256   | 21110   | 2.4  | 20.9032 | 1.5 | 0.1248         | 2.0 | 0.0189 | 1.3 | 0.66  | 120.9  | 1.6                | 119.4  | 2.3  | 90.3   | 35.7 | 120.9    | 1.6  |  |
| WP87-T Spot 153                                                          | 104   | 26037   | 1.8  | 19.7507 | 2.2 | 0.1321         | 2.7 | 0.0189 | 1.6 | 0.58  | 120.9  | 1.9                | 126.0  | 3.2  | 223.1  | 50.4 | 120.9    | 1.9  |  |
| WP87-T Spot 246                                                          | 382   | 29038   | 1.9  | 20.5754 | 1.2 | 0.1270         | 2.3 | 0.0190 | 1.9 | 0.84  | 121.0  | 2.3                | 121.4  | 2.6  | 127.7  | 29.2 | 121.0    | 2.3  |  |
| WP87-T Spot 165                                                          | 259   | 1281928 | 2.2  | 20.4508 | 1.9 | 0.1277         | 2.1 | 0.0190 | 1.0 | 0.48  | 121.0  | 1.2                | 122.1  | 2.4  | 141.9  | 43.5 | 121.0    | 1.2  |  |
| WP87-T Spot 220                                                          | 107   | 6225    | 2.4  | 21.4797 | 2.1 | 0.1216         | 2.4 | 0.0190 | 1.1 | 0.48  | 121.1  | 1.3                | 116.5  | 2.6  | 25.4   | 49.8 | 121.1    | 1.3  |  |
| WP87-T Spot 260                                                          | 217   | 15102   | 2.2  | 20.8871 | 1.3 | 0.1251         | 1.9 | 0.0190 | 1.3 | 0.71  | 121.1  | 1.6                | 119.7  | 2.1  | 92.1   | 31.0 | 121.1    | 1.6  |  |
| WP87-T Spot 100                                                          | 701   | 72600   | 1.8  | 20.3344 | 1.0 | 0.1285         | 2.0 | 0.0190 | 1.8 | 0.86  | 121.1  | 2.1                | 122.7  | 2.4  | 155.3  | 24.3 | 121.1    | 2.1  |  |
| WP87-T Spot 191                                                          | 243   | 15490   | 2.5  | 20.9084 | 1.7 | 0.1250         | 2.4 | 0.0190 | 1.7 | 0.70  | 121.1  | 2.1                | 119.6  | 2.8  | 89.7   | 41.2 | 121.1    | 2.1  |  |
| WP87-T Spot 270                                                          | 327   | 13083   | 1.9  | 20.8302 | 1.7 | 0.1255         | 2.4 | 0.0190 | 1.7 | 0.70  | 121.1  | 2.0                | 120.1  | 2.7  | 98.6   | 40.3 | 121.1    | 2.0  |  |
| WP87-T Spot 40                                                           | 384   | 19775   | 2.3  | 20.5608 | 1.3 | 0.1272         | 2.1 | 0.0190 | 1.6 | 0.78  | 121.2  | 1.9                | 121.6  | 2.4  | 129.3  | 30.9 | 121.2    | 1.9  |  |
| WP87-T Spot 230                                                          | 249   | 10654   | 2.8  | 21.2368 | 1.4 | 0.1232         | 1.7 | 0.0190 | 1.0 | 0.59  | 121.2  | 1.2                | 117.9  | 1.9  | 52.7   | 32.8 | 121.2    | 1.2  |  |
| WP87-T Spot 208                                                          | 121   | 5198    | 3.6  | 21.7362 | 3.3 | 0.1204         | 3.5 | 0.0190 | 1.1 | 0.31  | 121.2  | 1.3                | 115.4  | 3.8  | NA     | NA   | 121.2    | 1.3  |  |
| WP87-T Spot 180                                                          | 192   | 13685   | 2.6  | 20.1147 | 2.0 | 0.1301         | 2.6 | 0.0190 | 1.7 | 0.64  | 121.2  | 2.0                | 124.2  | 3.0  | 180.6  | 46.5 | 121.2    | 2.0  |  |
| WP87-T Spot 223                                                          | 350   | 67167   | 2.6  | 20.4609 | 1.6 | 0.1280         | 2.4 | 0.0190 | 1.8 | 0.75  | 121.3  | 2.1                | 122.3  | 2.7  | 140.8  | 37.0 | 121.3    | 2.1  |  |
| WP87-T Spot 287                                                          | 455   | 28475   | 14.3 | 19.8048 | 1.5 | 0.1322         | 2.3 | 0.0190 | 1.7 | 0.74  | 121.4  | 2.1                | 126.1  | 2.7  | 216.7  | 35.5 | 121.4    | 2.1  |  |
| WP87-T Spot 105                                                          | 334   | 44231   | 2.2  | 20.4891 | 1.2 | 0.1279         | 2.2 | 0.0190 | 1.8 | 0.83  | 121.4  | 2.2                | 122.2  | 2.5  | 137.5  | 28.9 | 121.4    | 2.2  |  |
| WP87-T Spot 206                                                          | 157   | 6171    | 2.6  | 21.1284 | 2.1 | 0.1241         | 2.5 | 0.0190 | 1.3 | 0.53  | 121.5  | 1.6                | 118.8  | 2.8  | 64.8   | 50.2 | 121.5    | 1.6  |  |
| WP87-T Spot 125                                                          | 154   | 116670  | 2.4  | 20.5266 | 1.7 | 0.1277         | 2.6 | 0.0190 | 2.0 | 0.78  | 121.5  | 2.5                | 122.0  | 3.0  | 133.2  | 39.0 | 121.5    | 2.5  |  |
| WP87-T Spot 48                                                           | 136   | 14635   | 3.5  | 20.4888 | 2.3 | 0.1280         | 2.9 | 0.0190 | 1.6 | 0.57  | 121.5  | 2.0                | 122.3  | 3.3  | 137.6  | 55.1 | 121.5    | 2.0  |  |
| WP87-T Spot 154                                                          | 383   | 93418   | 2.1  | 20.5137 | 1.5 | 0.1278         | 2.2 | 0.0190 | 1.5 | 0.72  | 121.5  | 1.9                | 122.2  | 2    |        |      |          |      |  |

|                 |     |         |     |         |     |        |     |        |     |      |       |     |       |     |       |      |       |     |
|-----------------|-----|---------|-----|---------|-----|--------|-----|--------|-----|------|-------|-----|-------|-----|-------|------|-------|-----|
| WP87-T Spot 110 | 259 | 8809    | 2.2 | 21.3718 | 1.6 | 0.1233 | 2.2 | 0.0191 | 1.6 | 0.71 | 122.1 | 1.9 | 118.1 | 2.5 | 37.5  | 37.7 | 122.1 | 1.9 |
| WP87-T Spot 218 | 181 | 37763   | 2.8 | 20.6123 | 1.8 | 0.1279 | 2.3 | 0.0191 | 1.5 | 0.63 | 122.1 | 1.8 | 122.2 | 2.7 | 123.4 | 42.9 | 122.1 | 1.8 |
| WP87-T Spot 106 | 220 | 26447   | 3.0 | 20.7164 | 1.4 | 0.1273 | 2.1 | 0.0191 | 1.5 | 0.71 | 122.1 | 1.8 | 121.6 | 2.4 | 111.5 | 34.2 | 122.1 | 1.8 |
| WP87-T Spot 235 | 292 | 36489   | 1.5 | 20.9597 | 1.5 | 0.1258 | 2.0 | 0.0191 | 1.3 | 0.63 | 122.2 | 1.5 | 120.3 | 2.3 | 83.9  | 36.4 | 122.2 | 1.5 |
| WP87-T Spot 307 | 138 | 6321    | 2.4 | 21.9729 | 3.1 | 0.1200 | 3.4 | 0.0191 | 1.4 | 0.40 | 122.2 | 1.7 | 115.1 | 3.7 | NA    | NA   | 122.2 | 1.7 |
| WP87-T Spot 205 | 149 | 13587   | 3.4 | 20.8495 | 2.1 | 0.1265 | 2.3 | 0.0191 | 1.1 | 0.46 | 122.2 | 1.3 | 120.9 | 2.7 | 96.4  | 49.2 | 122.2 | 1.3 |
| WP87-T Spot 178 | 322 | 14491   | 2.5 | 20.4713 | 1.3 | 0.1288 | 2.8 | 0.0191 | 2.5 | 0.88 | 122.2 | 3.0 | 123.0 | 3.2 | 139.5 | 30.9 | 122.2 | 3.0 |
| WP87-T Spot 209 | 176 | 94411   | 3.4 | 20.0751 | 1.8 | 0.1314 | 2.1 | 0.0191 | 1.1 | 0.52 | 122.2 | 1.4 | 125.3 | 2.5 | 185.2 | 42.6 | 122.2 | 1.4 |
| WP87-T Spot 134 | 227 | 40039   | 3.2 | 20.9067 | 1.7 | 0.1262 | 2.1 | 0.0191 | 1.2 | 0.58 | 122.2 | 1.5 | 120.7 | 2.3 | 89.9  | 39.7 | 122.2 | 1.5 |
| WP87-T Spot 126 | 203 | 12198   | 2.4 | 20.5122 | 2.2 | 0.1287 | 2.5 | 0.0192 | 1.2 | 0.47 | 122.3 | 1.4 | 122.9 | 2.9 | 134.9 | 51.5 | 122.3 | 1.4 |
| WP87-T Spot 203 | 267 | 26064   | 2.6 | 20.7326 | 1.4 | 0.1273 | 2.0 | 0.0192 | 1.4 | 0.71 | 122.3 | 1.7 | 121.7 | 2.3 | 109.7 | 33.2 | 122.3 | 1.7 |
| WP87-T Spot 233 | 288 | 13828   | 2.2 | 20.1792 | 1.6 | 0.1308 | 2.1 | 0.0192 | 1.3 | 0.62 | 122.3 | 1.6 | 124.8 | 2.4 | 173.2 | 38.0 | 122.3 | 1.6 |
| WP87-T Spot 19  | 253 | 21103   | 2.5 | 21.1233 | 1.6 | 0.1250 | 2.0 | 0.0192 | 1.2 | 0.58 | 122.3 | 1.4 | 119.6 | 2.3 | 65.4  | 38.8 | 122.3 | 1.4 |
| WP87-T Spot 104 | 251 | 50579   | 1.5 | 19.6424 | 1.5 | 0.1345 | 2.0 | 0.0192 | 1.2 | 0.63 | 122.4 | 1.5 | 128.1 | 2.4 | 235.8 | 34.9 | 122.4 | 1.5 |
| WP87-T Spot 173 | 118 | 6569    | 3.6 | 21.2479 | 1.3 | 0.1243 | 2.0 | 0.0192 | 1.5 | 0.76 | 122.4 | 1.8 | 119.0 | 2.3 | 51.4  | 31.3 | 122.4 | 1.8 |
| WP87-T Spot 202 | 220 | 13466   | 2.7 | 20.5436 | 1.3 | 0.1286 | 1.8 | 0.0192 | 1.2 | 0.68 | 122.4 | 1.5 | 122.8 | 2.1 | 131.3 | 30.8 | 122.4 | 1.5 |
| WP87-T Spot 219 | 217 | 27474   | 2.8 | 20.6204 | 1.7 | 0.1281 | 2.1 | 0.0192 | 1.2 | 0.58 | 122.4 | 1.4 | 122.4 | 2.4 | 122.5 | 39.4 | 122.4 | 1.4 |
| WP87-T Spot 13  | 196 | 1313601 | 3.1 | 20.5847 | 1.5 | 0.1284 | 2.2 | 0.0192 | 1.7 | 0.76 | 122.4 | 2.1 | 122.6 | 2.6 | 126.6 | 34.5 | 122.4 | 2.1 |
| WP87-T Spot 111 | 229 | 49754   | 2.4 | 20.6168 | 1.5 | 0.1282 | 2.2 | 0.0192 | 1.6 | 0.74 | 122.4 | 2.0 | 122.5 | 2.5 | 122.9 | 34.3 | 122.4 | 2.0 |
| WP87-T Spot 212 | 225 | 10661   | 2.2 | 20.8824 | 1.9 | 0.1266 | 2.4 | 0.0192 | 1.4 | 0.60 | 122.5 | 1.7 | 121.0 | 2.7 | 92.7  | 45.0 | 122.5 | 1.7 |
| WP87-T Spot 222 | 328 | 8255    | 2.3 | 21.2332 | 1.5 | 0.1245 | 2.7 | 0.0192 | 2.3 | 0.84 | 122.5 | 2.8 | 119.1 | 3.1 | 53.1  | 35.4 | 122.5 | 2.8 |
| WP87-T Spot 77  | 289 | 20296   | 2.2 | 20.3265 | 1.7 | 0.1301 | 2.3 | 0.0192 | 1.6 | 0.69 | 122.5 | 1.9 | 124.2 | 2.7 | 156.2 | 39.3 | 122.5 | 1.9 |
| WP87-T Spot 221 | 257 | 37183   | 3.0 | 20.3072 | 1.3 | 0.1302 | 2.0 | 0.0192 | 1.5 | 0.76 | 122.5 | 1.9 | 124.3 | 2.4 | 158.4 | 31.4 | 122.5 | 1.9 |
| WP87-T Spot 217 | 165 | 101139  | 3.0 | 19.7008 | 2.4 | 0.1342 | 2.9 | 0.0192 | 1.6 | 0.56 | 122.5 | 1.9 | 127.9 | 3.4 | 228.9 | 54.9 | 122.5 | 1.9 |
| WP87-T Spot 313 | 111 | 2759    | 2.7 | 22.8271 | 2.2 | 0.1159 | 2.6 | 0.0192 | 1.5 | 0.56 | 122.6 | 1.8 | 111.4 | 2.8 | NA    | NA   | 122.6 | 1.8 |
| WP87-T Spot 200 | 233 | 23071   | 2.1 | 20.3996 | 1.9 | 0.1298 | 2.4 | 0.0192 | 1.4 | 0.59 | 122.6 | 1.7 | 123.9 | 2.8 | 147.8 | 44.7 | 122.6 | 1.7 |
| WP87-T Spot 298 | 529 | 27466   | 2.2 | 20.9258 | 1.0 | 0.1265 | 2.0 | 0.0192 | 1.8 | 0.86 | 122.6 | 2.1 | 121.0 | 2.3 | 87.8  | 44.5 | 122.6 | 2.1 |
| WP87-T Spot 113 | 163 | 4655    | 2.5 | 21.1619 | 3.9 | 0.1252 | 4.1 | 0.0192 | 1.3 | 0.32 | 122.7 | 1.6 | 119.7 | 4.6 | 61.1  | 92.7 | 122.7 | 1.6 |
| WP87-T Spot 279 | 198 | 41911   | 2.4 | 20.8252 | 1.6 | 0.1272 | 2.1 | 0.0192 | 1.4 | 0.66 | 122.8 | 1.7 | 121.6 | 2.4 | 99.2  | 37.0 | 122.8 | 1.7 |
| WP87-T Spot 275 | 164 | 16584   | 2.4 | 20.7169 | 1.7 | 0.1279 | 2.3 | 0.0192 | 1.6 | 0.70 | 122.8 | 2.0 | 122.2 | 2.7 | 111.5 | 39.2 | 122.8 | 2.0 |
| WP87-T Spot 107 | 291 | 12406   | 2.4 | 20.5173 | 1.4 | 0.1292 | 2.0 | 0.0192 | 1.5 | 0.73 | 122.8 | 1.8 | 123.4 | 2.4 | 134.3 | 32.5 | 122.8 | 1.8 |
| WP87-T Spot 176 | 355 | 48815   | 1.9 | 20.9697 | 1.4 | 0.1264 | 2.6 | 0.0192 | 2.2 | 0.84 | 122.8 | 2.6 | 120.9 | 2.9 | 82.8  | 32.5 | 122.8 | 2.6 |
| WP87-T Spot 276 | 360 | 29716   | 2.2 | 20.7420 | 1.3 | 0.1279 | 2.3 | 0.0192 | 1.8 | 0.81 | 122.9 | 2.2 | 122.2 | 2.6 | 108.6 | 31.8 | 122.9 | 2.2 |
| WP87-T Spot 169 | 240 | 23109   | 2.2 | 20.7692 | 1.8 | 0.1277 | 2.2 | 0.0192 | 1.3 | 0.59 | 122.9 | 1.6 | 122.0 | 2.5 | 105.5 | 41.6 | 122.9 | 1.6 |
| WP87-T Spot 119 | 123 | 86637   | 2.3 | 20.5322 | 2.1 | 0.1292 | 2.5 | 0.0193 | 1.4 | 0.55 | 122.9 | 1.7 | 123.4 | 2.9 | 132.6 | 49.3 | 122.9 | 1.7 |
| WP87-T Spot 214 | 178 | 49982   | 2.8 | 20.3464 | 1.2 | 0.1304 | 1.9 | 0.0193 | 1.4 | 0.76 | 122.9 | 1.8 | 124.5 | 2.2 | 153.9 | 28.7 | 122.9 | 1.8 |
| WP87-T Spot 195 | 182 | 15587   | 2.8 | 20.9511 | 1.6 | 0.1267 | 2.3 | 0.0193 | 1.6 | 0.69 | 122.9 | 1.9 | 121.1 | 2.6 | 84.9  | 38.7 | 122.9 | 1.9 |
| WP87-T Spot 241 | 439 | 71631   | 1.5 | 20.6122 | 1.3 | 0.1288 | 2.3 | 0.0193 | 1.9 | 0.84 | 123.0 | 2.3 | 123.0 | 2.7 | 123.4 | 29.6 | 123.0 | 2.3 |
| WP87-T Spot 16  | 246 | 27008   | 2.6 | 21.1409 | 1.5 | 0.1256 | 1.8 | 0.0193 | 0.9 | 0.48 | 123.0 | 1.0 | 120.1 | 2.0 | 63.5  | 36.7 | 123.0 | 1.0 |
| WP87-T Spot 274 | 138 | 50655   | 2.7 | 20.0261 | 2.4 | 0.1326 | 2.8 | 0.0193 | 1.4 | 0.51 | 123.0 | 1.7 | 126.4 | 3.4 | 191.0 | 56.7 | 123.0 | 1.7 |
| WP87-T Spot 245 | 172 | 98845   | 2.6 | 20.4497 | 1.3 | 0.1299 | 1.6 | 0.0193 | 0.9 | 0.55 | 123.0 | 1.1 | 124.0 | 1.9 | 142.0 | 31.5 | 123.0 | 1.1 |
| WP87-T Spot 130 | 200 | 53216   | 2.5 | 20.3594 | 1.6 | 0.1305 | 2.1 | 0.0193 | 1.3 | 0.62 | 123.1 | 1.6 | 124.6 | 2.5 | 152.4 | 38.5 | 123.1 | 1.6 |
| WP87-T Spot 213 | 319 | 16194   | 2.6 | 20.9068 | 1.6 | 0.1271 | 2.6 | 0.0193 | 2.1 | 0.79 | 123.1 | 2.5 | 121.5 | 3.0 | 89.9  | 37.6 | 123.1 | 2.5 |
| WP87-T Spot 187 | 170 | 8746    | 3.1 | 21.1901 | 1.9 | 0.1254 | 2.4 | 0.0193 | 1.4 | 0.61 | 123.1 | 1.7 | 120.0 | 2.7 | 57.9  | 44.5 | 123.1 | 1.7 |
| WP87-T Spot 129 | 309 | 38181   | 2.1 | 20.5399 | 1.4 | 0.1294 | 1.9 | 0.0193 | 1.4 | 0.70 | 123.1 | 1.6 | 123.6 | 2.3 | 131.7 | 32.7 | 123.1 | 1.6 |
| WP87-T Spot 108 | 127 | 4082    | 2.4 | 21.1975 | 2.0 | 0.1254 | 2.4 | 0.0193 | 1.2 | 0.52 | 123.2 | 1.5 | 120.0 | 2.7 | 57.1  | 48.7 | 123.2 | 1.5 |
| WP87-T Spot 247 | 384 | 36159   | 2.1 | 20.4112 | 1.3 | 0.1303 | 2.5 | 0.0193 | 2.1 | 0.85 | 123.2 | 2.6 | 124.3 | 2.9 | 146.5 | 30.1 | 123.2 | 2.6 |
| WP87-T Spot 156 | 305 | 434448  | 2.7 | 20.4606 | 1.4 | 0.1300 | 2.1 | 0.0193 | 1.6 | 0.77 | 123.2 | 2.0 | 124.1 | 2.5 | 140.8 | 32.3 | 123.2 | 2.0 |
| WP87-T Spot 248 | 142 | 21537   | 2.6 | 20.9858 | 2.1 | 0.1268 | 2.9 | 0.0193 | 2.0 | 0.69 | 123.3 | 2.4 | 121.2 | 3.3 | 80.9  | 49.1 | 123.3 | 2.4 |
| WP87-T Spot 314 | 284 | 15570   | 2.3 | 20.8179 | 1.6 | 0.1278 | 2.1 | 0.0193 | 1.3 | 0.63 | 123.3 | 1.6 | 122.1 | 2.4 | 100.0 | 37.9 | 123.3 | 1.6 |
| WP87-T Spot 312 | 126 | 3772    | 3.0 | 21.8387 | 2.0 | 0.1219 | 2.3 | 0.0193 | 1.3 | 0.55 | 123.3 | 1.6 | 116.7 | 2.6 | NA    | NA   | 123.3 | 1.6 |
| WP87-T Spot 72  | 203 | 12160   | 3.0 | 20.9339 | 1.6 | 0.1271 | 2.1 | 0.0193 | 1.4 | 0.64 | 123.3 | 1.7 | 121.5 | 2.5 | 86.9  | 38.9 | 123.3 | 1.7 |
| WP87-T Spot 252 | 242 | 19945   | 2.3 | 20.7289 | 1.7 | 0.1284 | 2.4 | 0.0193 | 1.7 | 0.71 | 123.3 | 2.1 | 122.7 | 2.8 | 110.1 | 40.2 | 123.3 | 2.1 |
| WP87-T Spot 5   | 473 | 48540   | 1.5 | 18.1847 | 1.5 | 0.1464 | 2.3 | 0.0193 | 1.8 | 0.77 | 123.3 | 2.2 | 138.7 | 3.0 | 410.9 | 33.4 | 123.3 | 2.2 |
| WP87-T Spot 237 | 326 | 24614   | 2.4 | 20.7484 | 1.5 | 0.1283 | 2.1 | 0.0193 | 1.5 | 0.72 | 123.4 | 1.8 | 122.6 | 2.4 | 107.9 | 34.3 | 123.4 | 1.8 |
| WP87-T Spot 285 | 156 | 10186   | 2.7 | 21.2849 | 1.7 | 0.1251 | 2.4 | 0.0193 | 1.7 | 0.72 | 123.4 | 2.1 | 119.7 | 2.7 | 47.2  | 69.6 | 123.4 | 2.1 |
| WP87-T Spot 149 | 136 | 7055    | 3.1 | 21.6123 | 2.4 | 0.1232 | 2.8 | 0.0193 | 1.3 | 0.47 | 123.4 | 1.6 | 118.0 | 3.1 | 10.7  | 58.7 | 123.4 | 1.6 |
| WP87-T Spot 65  | 236 | 19614   | 2.5 | 20.5525 | 1.6 | 0.1296 | 2.3 | 0.0193 | 1.6 | 0.69 | 123.4 | 1.9 | 123.7 | 2.6 | 130.3 | 38.5 | 123.4 | 1.9 |
| WP87-T Spot 231 | 188 | 166044  | 3.3 | 20.6903 | 1.8 | 0.1288 | 2.7 | 0.0193 | 2.0 | 0.73 | 123.4 | 2.4 | 123.0 | 3.1 | 114.5 | 43.2 | 123.4 | 2.4 |
| WP87-T Spot 266 | 214 | 51230   | 2.8 | 20.1981 | 1.6 | 0.1319 | 2.1 | 0.0193 | 1.3 | 0.63 | 123.4 | 1.6 | 125.8 | 2.5 | 171.0 | 37.8 | 123.4 | 1.6 |
| WP87-T Spot 84  | 408 | 15098   | 2.3 | 20.9736 | 1.4 | 0.1270 | 2.3 | 0.0193 | 1.8 | 0.79 | 123.4 | 2.3 | 121.4 | 2.7 | 82.3  | 33.9 | 123.4 | 2.3 |
| WP87-T Spot 172 | 240 | 16228   | 2.6 | 21.1370 | 1.7 | 0.1261 | 2.1 | 0.0193 | 1.3 | 0.62 | 123.5 | 1.6 | 120.6 | 2.4 | 63.9  | 39.4 | 123.5 | 1.6 |
| WP87-T Spot 197 | 237 | 13774   | 3.2 | 21.0857 | 2.0 | 0.1264 | 2.3 | 0.0193 | 1.2 | 0.50 | 123.5 | 1.4 | 120.8 | 2.6 | 69.7  | 47.4 | 123.5 | 1.4 |
| WP87-T Spot 150 | 188 | 6786    | 3.1 | 21.6342 | 1.8 | 0.1232 | 2.3 | 0.0193 | 1.4 | 0.61 | 123.5 | 1.7 | 118.0 | 2.5 | 8.2   | 43.8 | 123.5 | 1.7 |
| WP87-T Spot 120 | 163 | 9683    | 3.0 | 20.8139 | 2.1 | 0.1281 | 2.4 | 0.0193 | 1.3 | 0.52 | 123.5 | 1.5 | 122.4 | 2.8 | 100.5 | 49.1 | 123.5 | 1.5 |
| WP87-T Spot 271 | 137 | 745104  | 2.8 | 19.5510 | 1.9 | 0.1364 | 2.4 | 0.0193 | 1.3 | 0.57 | 123.5 | 1.6 | 129.8 | 2.9 | 246.5 | 44.6 | 123.5 | 1.6 |
| WP87-T Spot 74  | 423 | 25397   | 1.9 | 20.7332 | 1.2 | 0.1286 | 2.2 | 0.0194 | 1.9 | 0.85 | 123.6 | 2.3 | 122.9 | 2.5 | 109.6 | 27.3 | 123.6 | 2.3 |
| WP87-T Spot 163 | 135 |         |     |         |     |        |     |        |     |      |       |     |       |     |       |      |       |     |

|                 |     |         |     |         |     |        |     |        |     |      |       |     |       |     |       |      |       |     |
|-----------------|-----|---------|-----|---------|-----|--------|-----|--------|-----|------|-------|-----|-------|-----|-------|------|-------|-----|
| WP87-T Spot 115 | 91  | 24918   | 3.3 | 21.0009 | 2.6 | 0.1276 | 2.9 | 0.0194 | 1.4 | 0.47 | 124.1 | 1.7 | 121.9 | 3.4 | 79.2  | 61.7 | 124.1 | 1.7 |
| WP87-T Spot 53  | 223 | 29436   | 3.0 | 20.8830 | 1.9 | 0.1283 | 2.5 | 0.0194 | 1.6 | 0.65 | 124.1 | 2.0 | 122.6 | 2.9 | 92.6  | 44.9 | 124.1 | 2.0 |
| WP87-T Spot 238 | 235 | 5920    | 2.6 | 21.0593 | 1.7 | 0.1273 | 2.5 | 0.0194 | 1.9 | 0.75 | 124.2 | 2.3 | 121.6 | 2.9 | 72.6  | 39.8 | 124.2 | 2.3 |
| WP87-T Spot 86  | 241 | 6244    | 1.8 | 21.3401 | 1.8 | 0.1256 | 2.3 | 0.0194 | 1.5 | 0.64 | 124.2 | 1.8 | 120.1 | 2.6 | 41.1  | 42.4 | 124.2 | 1.8 |
| WP87-T Spot 272 | 200 | 140512  | 1.8 | 19.2672 | 1.9 | 0.1391 | 2.3 | 0.0194 | 1.4 | 0.60 | 124.2 | 1.7 | 132.2 | 2.9 | 280.1 | 42.4 | 124.2 | 1.7 |
| WP87-T Spot 234 | 256 | 5798543 | 2.2 | 20.5809 | 1.5 | 0.1302 | 2.1 | 0.0194 | 1.4 | 0.69 | 124.2 | 1.8 | 124.3 | 2.5 | 127.0 | 35.8 | 124.2 | 1.8 |
| WP87-T Spot 210 | 110 | 8390    | 3.7 | 20.8631 | 1.9 | 0.1285 | 2.4 | 0.0194 | 1.4 | 0.60 | 124.2 | 1.8 | 122.7 | 2.8 | 94.9  | 45.4 | 124.2 | 1.8 |
| WP87-T Spot 215 | 293 | 11533   | 1.7 | 21.2196 | 1.8 | 0.1263 | 2.6 | 0.0194 | 1.8 | 0.71 | 124.2 | 2.2 | 120.8 | 2.9 | 54.6  | 42.8 | 124.2 | 2.2 |
| WP87-T Spot 99  | 83  | 19492   | 2.9 | 15.9736 | 2.2 | 0.1679 | 2.5 | 0.0195 | 1.2 | 0.49 | 124.2 | 1.5 | 157.6 | 3.7 | 693.8 | 47.1 | 124.2 | 1.5 |
| WP87-T Spot 96  | 109 | 102855  | 3.6 | 17.5721 | 2.5 | 0.1526 | 2.8 | 0.0195 | 1.3 | 0.46 | 124.2 | 1.6 | 144.2 | 3.8 | 487.0 | 54.8 | 124.2 | 1.6 |
| WP87-T Spot 289 | 232 | 60147   | 2.9 | 20.6614 | 1.5 | 0.1298 | 2.1 | 0.0195 | 1.4 | 0.67 | 124.3 | 1.7 | 123.9 | 2.4 | 117.8 | 36.6 | 124.3 | 1.7 |
| WP87-T Spot 24  | 239 | 5960    | 2.8 | 21.6604 | 3.0 | 0.1239 | 3.3 | 0.0195 | 1.4 | 0.42 | 124.3 | 1.7 | 118.6 | 3.7 | 5.3   | 73.2 | 124.3 | 1.7 |
| WP87-T Spot 243 | 133 | 3779    | 2.5 | 22.7164 | 1.7 | 0.1181 | 2.5 | 0.0195 | 1.8 | 0.72 | 124.3 | 2.2 | 113.3 | 2.7 | NA    | NA   | 124.3 | 2.2 |
| WP87-T Spot 46  | 195 | 34525   | 3.0 | 21.2226 | 1.5 | 0.1264 | 1.9 | 0.0195 | 1.2 | 0.64 | 124.3 | 1.5 | 120.9 | 2.2 | 54.3  | 35.5 | 124.3 | 1.5 |
| WP87-T Spot 201 | 289 | 26098   | 2.0 | 20.5390 | 1.4 | 0.1306 | 1.9 | 0.0195 | 1.2 | 0.66 | 124.3 | 1.5 | 124.7 | 2.2 | 131.8 | 33.2 | 124.3 | 1.5 |
| WP87-T Spot 281 | 295 | 16779   | 2.7 | 20.9946 | 1.7 | 0.1279 | 2.5 | 0.0195 | 1.8 | 0.71 | 124.3 | 2.2 | 122.2 | 2.8 | 79.9  | 41.1 | 124.3 | 2.2 |
| WP87-T Spot 17  | 143 | 19759   | 2.6 | 21.5806 | 1.9 | 0.1244 | 2.2 | 0.0195 | 1.2 | 0.53 | 124.4 | 1.4 | 119.0 | 2.5 | 14.2  | 44.8 | 124.4 | 1.4 |
| WP87-T Spot 109 | 379 | 142145  | 2.1 | 20.0820 | 1.2 | 0.1337 | 2.3 | 0.0195 | 2.0 | 0.86 | 124.4 | 2.5 | 127.4 | 2.8 | 184.4 | 28.0 | 124.4 | 2.5 |
| WP87-T Spot 253 | 123 | 8984    | 3.7 | 20.5706 | 1.7 | 0.1306 | 2.2 | 0.0195 | 1.5 | 0.66 | 124.4 | 1.8 | 124.6 | 2.6 | 128.2 | 39.8 | 124.4 | 1.8 |
| WP87-T Spot 280 | 256 | 30953   | 1.9 | 20.7248 | 1.2 | 0.1297 | 1.9 | 0.0195 | 1.4 | 0.75 | 124.5 | 1.7 | 123.8 | 2.2 | 110.6 | 29.1 | 124.5 | 1.7 |
| WP87-T Spot 0   | 143 | 8074    | 3.1 | 21.3795 | 2.0 | 0.1257 | 2.3 | 0.0195 | 1.2 | 0.52 | 124.5 | 1.5 | 120.2 | 2.6 | 36.6  | 47.5 | 124.5 | 1.5 |
| WP87-T Spot 85  | 153 | 8077    | 2.6 | 18.4061 | 3.0 | 0.1460 | 3.3 | 0.0195 | 1.3 | 0.39 | 124.5 | 1.6 | 138.4 | 4.2 | 383.7 | 67.8 | 124.5 | 1.6 |
| WP87-T Spot 31  | 122 | 50223   | 3.4 | 21.1704 | 2.1 | 0.1270 | 2.6 | 0.0195 | 1.5 | 0.59 | 124.5 | 1.9 | 121.4 | 3.0 | 60.1  | 49.7 | 124.5 | 1.9 |
| WP87-T Spot 269 | 297 | 45762   | 2.4 | 20.3885 | 1.6 | 0.1318 | 2.0 | 0.0195 | 1.2 | 0.62 | 124.5 | 1.5 | 125.8 | 2.4 | 149.1 | 37.0 | 124.5 | 1.5 |
| WP87-T Spot 21  | 133 | 50397   | 3.0 | 20.2316 | 1.8 | 0.1329 | 2.2 | 0.0195 | 1.4 | 0.61 | 124.5 | 1.7 | 126.7 | 2.7 | 167.1 | 41.4 | 124.5 | 1.7 |
| WP87-T Spot 79  | 206 | 34344   | 2.8 | 20.4549 | 1.8 | 0.1315 | 2.2 | 0.0195 | 1.3 | 0.60 | 124.6 | 1.6 | 125.4 | 2.6 | 141.5 | 41.3 | 124.6 | 1.6 |
| WP87-T Spot 23  | 248 | 25232   | 2.7 | 20.8355 | 1.5 | 0.1291 | 2.0 | 0.0195 | 1.3 | 0.66 | 124.6 | 1.6 | 123.3 | 2.3 | 98.0  | 35.6 | 124.6 | 1.6 |
| WP87-T Spot 43  | 104 | 6502    | 3.3 | 21.2296 | 2.4 | 0.1267 | 2.8 | 0.0195 | 1.6 | 0.56 | 124.6 | 2.0 | 121.1 | 3.2 | 53.5  | 56.3 | 124.6 | 2.0 |
| WP87-T Spot 28  | 154 | 5746    | 2.8 | 21.7730 | 1.5 | 0.1235 | 2.1 | 0.0195 | 1.4 | 0.67 | 124.6 | 1.7 | 118.3 | 2.3 | NA    | NA   | 124.6 | 1.7 |
| WP87-T Spot 189 | 187 | 12119   | 2.8 | 20.7618 | 2.0 | 0.1296 | 2.4 | 0.0195 | 1.4 | 0.58 | 124.6 | 1.7 | 123.7 | 2.8 | 106.3 | 46.4 | 124.6 | 1.7 |
| WP87-T Spot 29  | 135 | 32772   | 2.2 | 20.5584 | 2.5 | 0.1309 | 2.8 | 0.0195 | 1.3 | 0.48 | 124.6 | 1.7 | 124.9 | 3.3 | 129.6 | 57.9 | 124.6 | 1.7 |
| WP87-T Spot 11  | 149 | 107256  | 2.8 | 20.4584 | 1.3 | 0.1315 | 1.9 | 0.0195 | 1.3 | 0.70 | 124.7 | 1.6 | 125.5 | 2.2 | 141.0 | 31.3 | 124.7 | 1.6 |
| WP87-T Spot 92  | 117 | 5111    | 3.3 | 21.6593 | 1.8 | 0.1243 | 2.3 | 0.0195 | 1.5 | 0.62 | 124.7 | 1.8 | 118.9 | 2.6 | 5.5   | 44.2 | 124.7 | 1.8 |
| WP87-T Spot 80  | 201 | 11579   | 2.3 | 21.3574 | 1.6 | 0.1260 | 2.1 | 0.0195 | 1.4 | 0.68 | 124.7 | 1.8 | 120.5 | 2.4 | 39.2  | 37.5 | 124.7 | 1.8 |
| WP87-T Spot 273 | 155 | 25717   | 3.2 | 20.8573 | 2.2 | 0.1291 | 2.6 | 0.0195 | 1.4 | 0.53 | 124.7 | 1.7 | 123.3 | 3.1 | 95.5  | 52.7 | 124.7 | 1.7 |
| WP87-T Spot 232 | 207 | 10339   | 2.4 | 20.9460 | 2.1 | 0.1286 | 2.7 | 0.0195 | 1.7 | 0.61 | 124.7 | 2.0 | 122.8 | 3.1 | 85.5  | 50.2 | 124.7 | 2.0 |
| WP87-T Spot 101 | 245 | 17966   | 2.6 | 20.6252 | 1.5 | 0.1306 | 2.1 | 0.0195 | 1.4 | 0.67 | 124.8 | 1.7 | 124.6 | 2.4 | 121.9 | 36.0 | 124.8 | 1.7 |
| WP87-T Spot 36  | 119 | 3741    | 3.1 | 22.4174 | 3.3 | 0.1202 | 3.8 | 0.0195 | 1.8 | 0.47 | 124.8 | 2.2 | 115.2 | 4.1 | NA    | NA   | 124.8 | 2.2 |
| WP87-T Spot 22  | 155 | 13559   | 3.4 | 20.8949 | 2.0 | 0.1289 | 2.6 | 0.0195 | 1.6 | 0.61 | 124.8 | 1.9 | 123.2 | 3.0 | 91.3  | 48.6 | 124.8 | 1.9 |
| WP87-T Spot 194 | 137 | 17123   | 2.4 | 21.1013 | 1.6 | 0.1277 | 2.1 | 0.0196 | 1.4 | 0.64 | 124.8 | 1.7 | 122.0 | 2.4 | 67.9  | 38.9 | 124.8 | 1.7 |
| WP87-T Spot 204 | 219 | 62214   | 2.5 | 20.2183 | 1.8 | 0.1333 | 2.1 | 0.0196 | 1.2 | 0.56 | 124.9 | 1.5 | 127.1 | 2.5 | 168.7 | 41.0 | 124.9 | 1.5 |
| WP87-T Spot 161 | 228 | 11269   | 2.5 | 21.0236 | 1.7 | 0.1282 | 2.3 | 0.0196 | 1.5 | 0.66 | 124.9 | 1.8 | 122.5 | 2.6 | 76.7  | 40.5 | 124.9 | 1.8 |
| WP87-T Spot 89  | 329 | 23690   | 3.2 | 20.1209 | 1.3 | 0.1340 | 2.4 | 0.0196 | 2.0 | 0.83 | 124.9 | 2.5 | 127.7 | 2.9 | 179.9 | 30.9 | 124.9 | 2.5 |
| WP87-T Spot 76  | 219 | 24359   | 2.2 | 20.3313 | 1.8 | 0.1327 | 2.2 | 0.0196 | 1.3 | 0.57 | 124.9 | 1.6 | 126.5 | 2.6 | 155.7 | 42.1 | 124.9 | 1.6 |
| WP87-T Spot 283 | 230 | 19927   | 2.8 | 21.1895 | 1.9 | 0.1273 | 2.3 | 0.0196 | 1.3 | 0.58 | 125.0 | 1.7 | 121.7 | 2.7 | 58.0  | 45.7 | 125.0 | 1.7 |
| WP87-T Spot 296 | 141 | 5933    | 3.0 | 21.7362 | 2.5 | 0.1241 | 3.0 | 0.0196 | 1.6 | 0.55 | 125.0 | 2.0 | 118.8 | 3.3 | NA    | NA   | 125.0 | 2.0 |
| WP87-T Spot 63  | 168 | 31040   | 3.2 | 20.5541 | 2.0 | 0.1313 | 2.5 | 0.0196 | 1.5 | 0.60 | 125.0 | 1.8 | 125.2 | 2.9 | 130.1 | 46.5 | 125.0 | 1.8 |
| WP87-T Spot 293 | 212 | 194799  | 2.3 | 20.7749 | 1.3 | 0.1299 | 1.8 | 0.0196 | 1.2 | 0.69 | 125.0 | 1.5 | 124.0 | 2.1 | 104.9 | 30.6 | 125.0 | 1.5 |
| WP87-T Spot 56  | 152 | 39080   | 2.7 | 21.4204 | 1.9 | 0.1261 | 2.4 | 0.0196 | 1.5 | 0.60 | 125.1 | 1.8 | 120.6 | 2.8 | 32.1  | 46.2 | 125.1 | 1.8 |
| WP87-T Spot 25  | 185 | 3468139 | 2.9 | 20.6142 | 1.4 | 0.1311 | 2.0 | 0.0196 | 1.5 | 0.73 | 125.1 | 1.8 | 125.0 | 2.4 | 123.2 | 32.4 | 125.1 | 1.8 |
| WP87-T Spot 244 | 220 | 108797  | 2.6 | 20.4529 | 1.4 | 0.1322 | 1.9 | 0.0196 | 1.3 | 0.68 | 125.2 | 1.6 | 126.0 | 2.3 | 141.6 | 33.1 | 125.2 | 1.6 |
| WP87-T Spot 257 | 138 | 13335   | 3.0 | 20.6142 | 1.7 | 0.1311 | 2.0 | 0.0196 | 1.1 | 0.53 | 125.2 | 1.3 | 125.1 | 2.4 | 123.2 | 40.4 | 125.2 | 1.3 |
| WP87-T Spot 27  | 194 | 11602   | 3.1 | 21.1781 | 2.3 | 0.1277 | 2.8 | 0.0196 | 1.6 | 0.58 | 125.3 | 2.0 | 122.0 | 3.3 | 59.3  | 54.9 | 125.3 | 2.0 |
| WP87-T Spot 1   | 245 | 8961    | 2.5 | 21.1172 | 1.7 | 0.1282 | 2.3 | 0.0196 | 1.6 | 0.70 | 125.4 | 2.0 | 122.5 | 2.7 | 66.1  | 39.6 | 125.4 | 2.0 |
| WP87-T Spot 255 | 109 | 39136   | 3.6 | 20.7468 | 2.2 | 0.1305 | 2.9 | 0.0196 | 1.8 | 0.62 | 125.4 | 2.2 | 124.5 | 3.3 | 108.1 | 52.7 | 125.4 | 2.2 |
| WP87-T Spot 190 | 194 | 19903   | 2.4 | 20.4178 | 1.9 | 0.1327 | 2.3 | 0.0197 | 1.2 | 0.54 | 125.5 | 1.5 | 126.5 | 2.7 | 145.7 | 44.5 | 125.5 | 1.5 |
| WP87-T Spot 132 | 590 | 41207   | 1.9 | 20.4441 | 1.1 | 0.1325 | 2.2 | 0.0197 | 2.0 | 0.88 | 125.5 | 2.4 | 126.3 | 2.6 | 142.7 | 25.0 | 125.5 | 2.4 |
| WP87-T Spot 188 | 278 | 21189   | 2.6 | 21.1323 | 1.7 | 0.1282 | 2.2 | 0.0197 | 1.5 | 0.66 | 125.5 | 1.8 | 122.5 | 2.6 | 64.4  | 39.4 | 125.5 | 1.8 |
| WP87-T Spot 15  | 183 | 10720   | 2.7 | 21.0505 | 2.1 | 0.1287 | 2.6 | 0.0197 | 1.5 | 0.57 | 125.5 | 1.8 | 123.0 | 3.0 | 73.7  | 50.6 | 125.5 | 1.8 |
| WP87-T Spot 41  | 233 | 22330   | 2.6 | 21.1912 | 1.2 | 0.1279 | 2.0 | 0.0197 | 1.5 | 0.78 | 125.6 | 1.9 | 122.2 | 2.3 | 57.8  | 29.2 | 125.6 | 1.9 |
| WP87-T Spot 82  | 111 | 11731   | 3.4 | 20.4939 | 2.3 | 0.1323 | 2.9 | 0.0197 | 1.9 | 0.63 | 125.6 | 2.3 | 126.1 | 3.5 | 137.0 | 53.6 | 125.6 | 2.3 |
| WP87-T Spot 301 | 326 | 69595   | 2.2 | 20.8077 | 1.9 | 0.1303 | 3.5 | 0.0197 | 2.9 | 0.84 | 125.6 | 3.6 | 124.4 | 4.1 | 101.1 | 45.3 | 125.6 | 3.6 |
| WP87-T Spot 3   | 248 | 9052    | 2.7 | 21.5349 | 2.0 | 0.1261 | 2.6 | 0.0197 | 1.7 | 0.66 | 125.8 | 2.1 | 120.6 | 3.0 | 19.3  | 47.0 | 125.8 | 2.1 |
| WP87-T Spot 291 | 90  | 6686    | 2.8 | 18.3673 | 3.0 | 0.1479 | 3.2 | 0.0197 | 1.2 | 0.38 | 125.8 | 1.5 | 140.0 | 4.2 | 388.5 | 67.1 | 125.8 | 1.5 |
| WP87-T Spot 138 | 232 | 67554   | 2.8 | 20.0951 | 1.6 | 0.1352 | 2.1 | 0.0197 | 1.4 | 0.67 | 125.8 | 1.8 | 128.8 | 2.6 | 182.9 | 36.7 | 125.8 | 1.8 |
| WP87-T Spot 160 | 245 | 90807   | 2.5 | 20.2381 | 1.5 | 0.1343 | 1.8 | 0.0197 | 1.0 | 0.58 | 125.9 | 1.3 | 128.0 | 2.2 | 166.4 | 34.2 | 125.9 | 1.3 |
| WP87-T Spot 88  | 183 | 13761   | 3.5 | 20.7388 | 2.0 | 0.1312 | 2.5 | 0.0197 | 1.4 | 0.56 | 126.0 | 1.7 | 125.1 | 2.9 | 109.0 | 48.1 | 126.0 | 1.7 |
| WP87-T Spot 152 | 234 | 23053   | 2.7 | 21.5255 | 1.7 | 0      |     |        |     |      |       |     |       |     |       |      |       |     |

|                 |      |         |     |         |      |        |      |        |     |      |       |     |       |      |        |       |       |     |
|-----------------|------|---------|-----|---------|------|--------|------|--------|-----|------|-------|-----|-------|------|--------|-------|-------|-----|
| WP87-T Spot 66  | 147  | 3966    | 3.1 | 21.8495 | 1.9  | 0.1250 | 2.4  | 0.0198 | 1.5 | 0.63 | 126.5 | 1.9 | 119.6 | 2.8  | NA     | NA    | 126.5 | 1.9 |
| WP87-T Spot 171 | 214  | 52239   | 2.3 | 20.5173 | 1.4  | 0.1331 | 2.0  | 0.0198 | 1.4 | 0.69 | 126.5 | 1.7 | 126.9 | 2.3  | 134.3  | 33.3  | 126.5 | 1.7 |
| WP87-T Spot 198 | 149  | 19082   | 2.7 | 21.0340 | 2.0  | 0.1299 | 2.3  | 0.0198 | 1.1 | 0.47 | 126.5 | 1.3 | 124.0 | 2.7  | 75.5   | 48.1  | 126.5 | 1.3 |
| WP87-T Spot 168 | 278  | 11703   | 2.5 | 20.0806 | 1.6  | 0.1360 | 2.1  | 0.0198 | 1.3 | 0.64 | 126.5 | 1.7 | 129.5 | 2.5  | 184.6  | 37.2  | 126.5 | 1.7 |
| WP87-T Spot 196 | 142  | 68904   | 3.4 | 20.8010 | 1.9  | 0.1313 | 2.2  | 0.0198 | 1.0 | 0.46 | 126.5 | 1.2 | 125.3 | 2.5  | 101.9  | 45.1  | 126.5 | 1.2 |
| WP87-T Spot 68  | 140  | 19810   | 3.4 | 20.5072 | 1.7  | 0.1332 | 1.9  | 0.0198 | 0.9 | 0.47 | 126.5 | 1.2 | 127.0 | 2.3  | 135.4  | 40.2  | 126.5 | 1.2 |
| WP87-T Spot 226 | 95   | 16232   | 3.7 | 20.4302 | 2.7  | 0.1338 | 3.1  | 0.0198 | 1.5 | 0.49 | 126.6 | 1.9 | 127.5 | 3.7  | 144.3  | 64.0  | 126.6 | 1.9 |
| WP87-T Spot 34  | 80   | 8848    | 3.5 | 22.2592 | 2.2  | 0.1228 | 2.7  | 0.0198 | 1.5 | 0.56 | 126.6 | 1.9 | 117.6 | 3.0  | NA     | NA    | 126.6 | 1.9 |
| WP87-T Spot 284 | 197  | 579098  | 2.1 | 20.3591 | 1.6  | 0.1343 | 2.0  | 0.0198 | 1.1 | 0.56 | 126.7 | 1.4 | 128.0 | 2.4  | 152.5  | 38.1  | 126.7 | 1.4 |
| WP87-T Spot 216 | 214  | 17718   | 2.2 | 20.4250 | 1.6  | 0.1339 | 2.0  | 0.0198 | 1.2 | 0.59 | 126.7 | 1.5 | 127.6 | 2.4  | 144.8  | 38.7  | 126.7 | 1.5 |
| WP87-T Spot 148 | 179  | 33482   | 6.3 | 19.7622 | 1.7  | 0.1385 | 2.2  | 0.0199 | 1.4 | 0.65 | 126.8 | 1.8 | 131.7 | 2.7  | 221.7  | 39.1  | 126.8 | 1.8 |
| WP87-T Spot 174 | 230  | 31052   | 3.0 | 20.5542 | 1.6  | 0.1332 | 2.3  | 0.0199 | 1.7 | 0.73 | 126.8 | 2.1 | 127.0 | 2.7  | 130.0  | 36.5  | 126.8 | 2.1 |
| WP87-T Spot 47  | 198  | 10540   | 2.6 | 20.8217 | 1.5  | 0.1316 | 2.0  | 0.0199 | 1.3 | 0.67 | 126.9 | 1.7 | 125.5 | 2.3  | 99.5   | 34.5  | 126.9 | 1.7 |
| WP87-T Spot 199 | 223  | 9326    | 2.2 | 21.2521 | 1.7  | 0.1291 | 2.3  | 0.0199 | 1.5 | 0.66 | 127.1 | 1.9 | 123.3 | 2.6  | 50.9   | 40.6  | 127.1 | 1.9 |
| WP87-T Spot 184 | 1162 | 107022  | 1.1 | 20.7488 | 1.0  | 0.1322 | 1.9  | 0.0199 | 1.6 | 0.85 | 127.1 | 2.0 | 126.1 | 2.2  | 107.8  | 23.4  | 127.1 | 2.0 |
| WP87-T Spot 185 | 234  | 34873   | 2.3 | 20.6436 | 1.7  | 0.1329 | 2.1  | 0.0199 | 1.3 | 0.61 | 127.1 | 1.6 | 126.7 | 2.5  | 119.8  | 39.3  | 127.1 | 1.6 |
| WP87-T Spot 295 | 140  | 5010    | 2.8 | 21.4894 | 1.4  | 0.1278 | 1.9  | 0.0199 | 1.3 | 0.70 | 127.2 | 1.7 | 122.2 | 2.2  | 24.4   | 32.9  | 127.2 | 1.7 |
| WP87-T Spot 186 | 98   | 15283   | 2.9 | 21.0224 | 2.3  | 0.1307 | 2.7  | 0.0199 | 1.4 | 0.53 | 127.2 | 1.8 | 124.7 | 3.2  | 76.8   | 54.8  | 127.2 | 1.8 |
| WP87-T Spot 30  | 234  | 13707   | 2.9 | 20.7892 | 1.3  | 0.1322 | 2.9  | 0.0199 | 2.5 | 0.89 | 127.2 | 3.2 | 126.0 | 3.4  | 103.3  | 31.4  | 127.2 | 3.2 |
| WP87-T Spot 122 | 100  | 6650    | 3.6 | 21.4967 | 3.0  | 0.1280 | 3.2  | 0.0200 | 1.1 | 0.34 | 127.4 | 1.4 | 122.3 | 3.7  | 23.5   | 72.1  | 127.4 | 1.4 |
| WP87-T Spot 251 | 91   | 3815    | 3.0 | 16.5055 | 3.5  | 0.1669 | 3.8  | 0.0200 | 1.4 | 0.38 | 127.5 | 1.8 | 156.7 | 5.5  | 623.6  | 75.3  | 127.5 | 1.8 |
| WP87-T Spot 121 | 112  | 81504   | 3.4 | 20.1355 | 1.5  | 0.1368 | 2.0  | 0.0200 | 1.3 | 0.65 | 127.6 | 1.7 | 130.2 | 2.5  | 178.2  | 35.9  | 127.6 | 1.7 |
| WP87-T Spot 267 | 82   | 10565   | 3.7 | 21.2727 | 2.9  | 0.1296 | 3.4  | 0.0200 | 1.8 | 0.52 | 127.7 | 2.2 | 123.7 | 4.0  | 48.6   | 69.8  | 127.7 | 2.2 |
| WP87-T Spot 118 | 166  | 47921   | 2.8 | 20.3372 | 1.7  | 0.1355 | 2.3  | 0.0200 | 1.6 | 0.68 | 127.7 | 2.0 | 129.1 | 2.8  | 155.0  | 39.9  | 127.7 | 2.0 |
| WP87-T Spot 305 | 254  | 31488   | 2.3 | 20.3112 | 1.4  | 0.1358 | 2.1  | 0.0200 | 1.6 | 0.76 | 127.7 | 2.0 | 129.3 | 2.6  | 158.0  | 32.1  | 127.7 | 2.0 |
| WP87-T Spot 33  | 164  | 4347    | 2.4 | 21.8101 | 2.8  | 0.1266 | 3.1  | 0.0200 | 1.4 | 0.45 | 127.8 | 1.8 | 121.0 | 3.6  | NA     | NA    | 127.8 | 1.8 |
| WP87-T Spot 310 | 119  | 59970   | 2.9 | 19.9097 | 1.9  | 0.1388 | 2.4  | 0.0200 | 1.5 | 0.62 | 127.9 | 1.9 | 131.9 | 2.9  | 204.5  | 43.1  | 127.9 | 1.9 |
| WP87-T Spot 286 | 127  | 9875    | 3.6 | 21.5812 | 2.6  | 0.1281 | 2.9  | 0.0201 | 1.2 | 0.42 | 128.0 | 1.5 | 122.4 | 3.4  | 14.1   | 63.6  | 128.0 | 1.5 |
| WP87-T Spot 55  | 89   | 14580   | 3.6 | 21.3432 | 2.2  | 0.1296 | 2.6  | 0.0201 | 1.4 | 0.53 | 128.1 | 1.8 | 123.7 | 3.0  | 40.7   | 52.8  | 128.1 | 1.8 |
| WP87-T Spot 7   | 140  | 167328  | 2.7 | 19.1324 | 2.6  | 0.1446 | 2.8  | 0.0201 | 1.2 | 0.43 | 128.1 | 1.6 | 137.1 | 3.7  | 296.1  | 58.6  | 128.1 | 1.6 |
| WP87-T Spot 309 | 94   | 2854    | 2.5 | 22.2927 | 2.4  | 0.1245 | 2.8  | 0.0201 | 1.5 | 0.54 | 128.5 | 1.9 | 119.1 | 3.2  | NA     | NA    | 128.5 | 1.9 |
| WP87-T Spot 159 | 179  | 6118    | 2.4 | 21.6545 | 1.7  | 0.1281 | 2.4  | 0.0201 | 1.6 | 0.69 | 128.5 | 2.1 | 122.4 | 2.7  | 5.9    | 41.2  | 128.5 | 2.1 |
| WP87-T Spot 193 | 250  | 27993   | 2.3 | 20.9840 | 1.7  | 0.1322 | 2.1  | 0.0201 | 1.3 | 0.60 | 128.5 | 1.6 | 126.1 | 2.5  | 81.1   | 40.4  | 128.5 | 1.6 |
| WP87-T Spot 265 | 135  | 8847    | 2.3 | 21.7296 | 2.2  | 0.1277 | 2.6  | 0.0201 | 1.4 | 0.55 | 128.5 | 1.8 | 122.1 | 3.0  | NA     | NA    | 128.5 | 1.8 |
| WP87-T Spot 311 | 187  | 9773    | 2.8 | 21.6586 | 2.3  | 0.1285 | 2.6  | 0.0202 | 1.4 | 0.52 | 128.8 | 1.8 | 122.7 | 3.1  | 5.5    | 54.2  | 128.8 | 1.8 |
| WP87-T Spot 70  | 414  | 105583  | 4.9 | 20.5644 | 1.3  | 0.1354 | 2.2  | 0.0202 | 1.8 | 0.81 | 128.9 | 2.3 | 128.9 | 2.7  | 128.9  | 30.8  | 128.9 | 2.3 |
| WP87-T Spot 162 | 297  | 10194   | 2.4 | 21.0103 | 1.3  | 0.1328 | 2.0  | 0.0202 | 1.5 | 0.74 | 129.2 | 1.9 | 126.6 | 2.4  | 78.2   | 31.9  | 129.2 | 1.9 |
| WP87-T Spot 225 | 201  | 11081   | 1.9 | 20.2860 | 1.6  | 0.1382 | 2.0  | 0.0203 | 1.2 | 0.61 | 129.8 | 1.6 | 131.4 | 2.4  | 160.9  | 36.6  | 129.8 | 1.6 |
| WP87-T Spot 98  | 271  | 10547   | 2.4 | 20.9109 | 1.5  | 0.1345 | 2.0  | 0.0204 | 1.3 | 0.64 | 130.2 | 1.7 | 128.1 | 2.4  | 89.5   | 36.7  | 130.2 | 1.7 |
| WP87-T Spot 54  | 122  | 18743   | 3.0 | 21.4358 | 2.2  | 0.1314 | 2.5  | 0.0204 | 1.1 | 0.46 | 130.4 | 1.5 | 125.3 | 2.9  | 30.4   | 52.8  | 130.4 | 1.5 |
| WP87-T Spot 58  | 120  | 11194   | 2.7 | 20.7545 | 2.3  | 0.1357 | 2.6  | 0.0204 | 1.3 | 0.49 | 130.4 | 1.7 | 129.2 | 3.2  | 107.2  | 54.3  | 130.4 | 1.7 |
| WP87-T Spot 179 | 65   | 2214    | 3.1 | 23.8799 | 2.7  | 0.1182 | 3.2  | 0.0205 | 1.6 | 0.51 | 130.7 | 2.1 | 113.4 | 3.4  | NA     | NA    | 130.7 | 2.1 |
| WP87-T Spot 114 | 716  | 28926   | 2.5 | 20.2643 | 1.1  | 0.1394 | 2.2  | 0.0205 | 1.9 | 0.85 | 130.8 | 2.4 | 132.5 | 2.7  | 163.3  | 26.6  | 130.8 | 2.4 |
| WP87-T Spot 158 | 188  | 14930   | 2.5 | 20.7223 | 1.5  | 0.1363 | 2.1  | 0.0205 | 1.6 | 0.73 | 130.8 | 2.0 | 129.7 | 2.6  | 110.8  | 34.3  | 130.8 | 2.0 |
| WP87-T Spot 147 | 395  | 23754   | 2.8 | 21.0553 | 1.4  | 0.1345 | 2.3  | 0.0205 | 1.8 | 0.79 | 131.1 | 2.3 | 128.1 | 2.7  | 73.1   | 32.9  | 131.1 | 2.3 |
| WP87-T Spot 45  | 114  | 9769    | 3.0 | 20.9772 | 1.8  | 0.1351 | 2.2  | 0.0206 | 1.3 | 0.57 | 131.3 | 1.6 | 128.7 | 2.7  | 81.9   | 42.8  | 131.3 | 1.6 |
| WP87-T Spot 239 | 275  | 16754   | 2.2 | 21.5319 | 1.7  | 0.1324 | 2.1  | 0.0207 | 1.3 | 0.61 | 132.0 | 1.7 | 126.3 | 2.6  | 19.6   | 40.8  | 132.0 | 1.7 |
| WP87-T Spot 256 | 74   | 7440    | 2.7 | 14.1663 | 5.1  | 0.2055 | 5.3  | 0.0211 | 1.4 | 0.26 | 134.8 | 1.8 | 189.8 | 9.1  | 944.7  | 104.5 | 134.8 | 1.8 |
| WP87-T Spot 302 | 109  | 8833    | 2.7 | 21.8188 | 2.8  | 0.1339 | 3.1  | 0.0212 | 1.3 | 0.41 | 135.3 | 1.7 | 127.6 | 3.7  | NA     | NA    | 135.3 | 1.7 |
| WP87-T Spot 236 | 232  | 8531    | 2.1 | 21.0283 | 1.4  | 0.1421 | 2.1  | 0.0217 | 1.6 | 0.75 | 138.2 | 2.2 | 134.9 | 2.7  | 76.1   | 33.3  | 138.2 | 2.2 |
| WP87-T Spot 4   | 233  | 30853   | 1.8 | 20.2339 | 1.8  | 0.1574 | 2.1  | 0.0231 | 1.1 | 0.52 | 147.3 | 1.5 | 148.4 | 2.8  | 166.9  | 41.3  | 147.3 | 1.5 |
| WP87-T Spot 192 | 355  | 104013  | 1.4 | 20.0283 | 1.4  | 0.1603 | 2.2  | 0.0233 | 1.7 | 0.77 | 148.5 | 2.5 | 151.0 | 3.1  | 190.7  | 32.6  | 148.5 | 2.5 |
| WP87-T Spot 140 | 544  | 163273  | 1.7 | 20.3665 | 1.1  | 0.1578 | 2.1  | 0.0233 | 1.8 | 0.86 | 148.6 | 2.6 | 148.8 | 2.9  | 151.6  | 25.3  | 148.6 | 2.6 |
| WP87-T Spot 143 | 263  | 19734   | 2.1 | 20.1979 | 1.3  | 0.1592 | 1.9  | 0.0233 | 1.5 | 0.75 | 148.7 | 2.1 | 150.0 | 2.7  | 171.0  | 29.6  | 148.7 | 2.1 |
| WP87-T Spot 51  | 63   | 1246    | 3.7 | 5.8446  | 10.6 | 0.5531 | 10.7 | 0.0235 | 1.8 | 0.17 | 149.5 | 2.7 | 447.1 | 38.8 | 2567.7 | 177.3 | 149.5 | 2.7 |
| WP87-T Spot 95  | 212  | 15636   | 2.0 | 20.2675 | 1.5  | 0.1602 | 2.3  | 0.0236 | 1.7 | 0.73 | 150.1 | 2.5 | 150.9 | 3.2  | 163.0  | 35.8  | 150.1 | 2.5 |
| WP87-T Spot 294 | 163  | 10498   | 2.0 | 20.9825 | 2.2  | 0.1547 | 2.6  | 0.0236 | 1.3 | 0.52 | 150.1 | 2.0 | 146.1 | 3.5  | 81.3   | 52.3  | 150.1 | 2.0 |
| WP87-T Spot 299 | 409  | 35592   | 1.3 | 20.1475 | 1.3  | 0.1621 | 2.0  | 0.0237 | 1.6 | 0.77 | 151.0 | 2.3 | 152.6 | 2.8  | 176.8  | 29.6  | 151.0 | 2.3 |
| WP87-T Spot 142 | 142  | 49853   | 2.1 | 20.2242 | 1.4  | 0.1632 | 1.9  | 0.0240 | 1.4 | 0.71 | 152.6 | 2.1 | 153.5 | 2.7  | 168.0  | 31.9  | 152.6 | 2.1 |
| WP87-T Spot 164 | 76   | 3378    | 2.1 | 20.9840 | 3.1  | 0.1587 | 3.5  | 0.0242 | 1.6 | 0.45 | 153.9 | 2.4 | 149.6 | 4.8  | 81.1   | 73.4  | 153.9 | 2.4 |
| WP87-T Spot 133 | 111  | 8726    | 2.7 | 11.5511 | 4.8  | 0.2887 | 5.1  | 0.0242 | 1.8 | 0.36 | 154.1 | 2.8 | 257.5 | 11.7 | 1350.1 | 92.9  | 154.1 | 2.8 |
| WP87-T Spot 67  | 203  | 64387   | 2.4 | 20.3158 | 1.4  | 0.1652 | 1.8  | 0.0244 | 1.2 | 0.67 | 155.1 | 1.9 | 155.3 | 2.7  | 157.4  | 32.1  | 155.1 | 1.9 |
| WP87-T Spot 64  | 286  | 67206   | 1.4 | 20.1672 | 1.1  | 0.1666 | 1.5  | 0.0244 | 1.0 | 0.67 | 155.2 | 1.5 | 156.4 | 2.1  | 174.6  | 25.3  | 155.2 | 1.5 |
| WP87-T Spot 49  | 184  | 8706    | 2.4 | 20.8507 | 2.0  | 0.1614 | 2.4  | 0.0244 | 1.4 | 0.59 | 155.5 | 2.2 | 151.9 | 3.4  | 96.3   | 46.2  | 155.5 | 2.2 |
| WP87-T Spot 259 | 205  | 11675   | 2.5 | 20.4319 | 1.5  | 0.1651 | 2.3  | 0.0245 | 1.7 | 0.74 | 155.9 | 2.7 | 155.2 | 3.3  | 144.1  | 36.2  | 155.9 | 2.7 |
| WP87-T Spot 141 | 288  | 97227   | 2.1 | 19.9593 | 1.7  | 0.1703 | 2.5  | 0.0247 | 1.8 | 0.73 | 157.0 | 2.8 | 159.7 | 3.7  | 198.7  | 39.5  | 157.0 | 2.8 |
| WP87-T Spot 52  | 426  | 5500684 | 2.1 | 20.2618 | 1.3  | 0.1691 | 2.5  | 0.0249 | 2.1 | 0.85 | 158.3 | 3.3 | 158.7 | 3.6  | 163.6  | 30.5  | 158.3 | 3.3 |
| WP87-T Spot 268 | 110  | 15745   | 2.3 | 20.6581 | 1.7  | 0.1709 |      |        |     |      |       |     |       |      |        |       |       |     |

|               |     |         |     |         |      |        |      |        |     |      |       |     |       |      |       |      |       |     |
|---------------|-----|---------|-----|---------|------|--------|------|--------|-----|------|-------|-----|-------|------|-------|------|-------|-----|
| WP87 Spot 75  | 100 | 1741    | 3.2 | 23.6845 | 10.6 | 0.1093 | 11.0 | 0.0188 | 3.2 | 0.29 | 120.0 | 3.8 | 105.3 | 11.0 | NA    | NA   | 120.0 | 3.8 |
| WP87 Spot 17  | 313 | 31759   | 2.2 | 20.6719 | 1.8  | 0.1254 | 3.8  | 0.0188 | 3.3 | 0.88 | 120.1 | 4.0 | 119.9 | 4.3  | 117.6 | 42.7 | 120.1 | 4.0 |
| WP87 Spot 110 | 711 | 15408   | 1.3 | 20.6299 | 1.8  | 0.1257 | 3.8  | 0.0188 | 3.4 | 0.89 | 120.2 | 4.1 | 120.2 | 4.4  | 122.4 | 42.0 | 120.2 | 4.1 |
| WP87 Spot 99  | 102 | 1289    | 2.8 | 27.3791 | 6.0  | 0.0949 | 6.7  | 0.0189 | 3.0 | 0.45 | 120.4 | 3.6 | 92.0  | 5.9  | NA    | NA   | 120.4 | 3.6 |
| WP87 Spot 109 | 77  | 865     | 2.8 | 29.8434 | 26.2 | 0.0871 | 26.4 | 0.0189 | 3.4 | 0.13 | 120.4 | 4.1 | 84.8  | 21.5 | NA    | NA   | 120.4 | 4.1 |
| WP87 Spot 22  | 182 | 3091    | 1.8 | 22.1383 | 3.6  | 0.1174 | 4.3  | 0.0189 | 2.4 | 0.55 | 120.4 | 2.8 | 112.7 | 4.6  | NA    | NA   | 120.4 | 2.8 |
| WP87 Spot 96  | 287 | 4064    | 2.2 | 22.2858 | 2.5  | 0.1166 | 4.1  | 0.0189 | 3.3 | 0.80 | 120.4 | 3.9 | 112.0 | 4.4  | NA    | NA   | 120.4 | 3.9 |
| WP87 Spot 85  | 162 | 7592    | 2.8 | 21.8689 | 2.0  | 0.1190 | 3.2  | 0.0189 | 2.5 | 0.78 | 120.6 | 3.0 | 114.2 | 3.5  | NA    | NA   | 120.6 | 3.0 |
| WP87 Spot 21  | 188 | 33556   | 2.3 | 20.1686 | 2.5  | 0.1291 | 3.7  | 0.0189 | 2.7 | 0.73 | 120.7 | 3.2 | 123.3 | 4.3  | 175.4 | 59.4 | 120.7 | 3.2 |
| WP87 Spot 40  | 119 | 14108   | 2.7 | 20.5832 | 3.0  | 0.1266 | 4.7  | 0.0189 | 3.7 | 0.77 | 120.7 | 4.4 | 121.0 | 5.4  | 127.8 | 70.7 | 120.7 | 4.4 |
| WP87 Spot 50  | 94  | 1559    | 2.5 | 25.7363 | 3.1  | 0.1015 | 4.2  | 0.0190 | 2.8 | 0.67 | 121.0 | 3.4 | 98.1  | 3.9  | NA    | NA   | 121.0 | 3.4 |
| WP87 Spot 24  | 174 | 1128    | 1.8 | 27.6982 | 6.8  | 0.0943 | 7.3  | 0.0190 | 2.7 | 0.37 | 121.0 | 3.2 | 91.5  | 6.4  | NA    | NA   | 121.0 | 3.2 |
| WP87 Spot 83  | 160 | 1883    | 2.2 | 24.0398 | 2.9  | 0.1087 | 4.0  | 0.0190 | 2.8 | 0.70 | 121.1 | 3.3 | 104.8 | 3.9  | NA    | NA   | 121.1 | 3.3 |
| WP87 Spot 47  | 146 | 1326    | 2.2 | 25.8975 | 3.6  | 0.1009 | 4.8  | 0.0190 | 3.2 | 0.67 | 121.1 | 3.8 | 97.6  | 4.5  | NA    | NA   | 121.1 | 3.8 |
| WP87 Spot 74  | 620 | 8361    | 1.3 | 20.9003 | 1.3  | 0.1252 | 2.9  | 0.0190 | 2.6 | 0.90 | 121.3 | 3.1 | 119.8 | 3.3  | 91.7  | 30.3 | 121.3 | 3.1 |
| WP87 Spot 91  | 188 | 18816   | 2.5 | 19.8225 | 2.3  | 0.1323 | 4.0  | 0.0190 | 3.3 | 0.82 | 121.5 | 3.9 | 126.2 | 4.7  | 215.7 | 52.6 | 121.5 | 3.9 |
| WP87 Spot 70  | 226 | 4801    | 2.1 | 21.0000 | 1.5  | 0.1249 | 3.1  | 0.0190 | 2.7 | 0.87 | 121.5 | 3.2 | 119.5 | 3.5  | 80.4  | 36.3 | 121.5 | 3.2 |
| WP87 Spot 12  | 166 | 1907    | 1.8 | 24.3220 | 4.4  | 0.1079 | 5.3  | 0.0190 | 3.1 | 0.58 | 121.6 | 3.7 | 104.0 | 5.3  | NA    | NA   | 121.6 | 3.7 |
| WP87 Spot 60  | 307 | 6001    | 2.1 | 21.1260 | 2.3  | 0.1243 | 3.6  | 0.0191 | 2.8 | 0.78 | 121.7 | 3.4 | 119.0 | 4.0  | 66.2  | 53.7 | 121.7 | 3.4 |
| WP87 Spot 30  | 199 | 2730    | 3.1 | 21.7809 | 2.0  | 0.1206 | 3.6  | 0.0191 | 3.0 | 0.83 | 121.7 | 3.6 | 115.6 | 3.9  | NA    | NA   | 121.7 | 3.6 |
| WP87 Spot 2   | 328 | 8018    | 2.2 | 20.7648 | 1.6  | 0.1266 | 2.9  | 0.0191 | 2.4 | 0.83 | 121.8 | 2.9 | 121.0 | 3.3  | 107.1 | 37.3 | 121.8 | 2.9 |
| WP87 Spot 78  | 391 | 4017    | 1.2 | 21.7622 | 1.7  | 0.1208 | 3.0  | 0.0191 | 2.5 | 0.83 | 121.8 | 3.0 | 115.8 | 3.3  | NA    | NA   | 121.8 | 3.0 |
| WP87 Spot 55  | 361 | 13401   | 1.6 | 20.1021 | 1.4  | 0.1309 | 3.2  | 0.0191 | 2.9 | 0.89 | 121.9 | 3.4 | 124.9 | 3.7  | 183.1 | 33.1 | 121.9 | 3.4 |
| WP87 Spot 35  | 125 | 1725    | 2.1 | 24.2301 | 3.7  | 0.1086 | 5.0  | 0.0191 | 3.4 | 0.68 | 122.0 | 4.1 | 104.7 | 5.0  | NA    | NA   | 122.0 | 4.1 |
| WP87 Spot 108 | 99  | 1938    | 2.9 | 23.1380 | 4.4  | 0.1138 | 5.5  | 0.0191 | 3.3 | 0.60 | 122.0 | 4.0 | 109.4 | 5.7  | NA    | NA   | 122.0 | 4.0 |
| WP87 Spot 3   | 237 | 3067    | 3.0 | 22.3820 | 3.5  | 0.1176 | 4.3  | 0.0191 | 2.4 | 0.56 | 122.0 | 2.9 | 112.9 | 4.6  | NA    | NA   | 122.0 | 2.9 |
| WP87 Spot 64  | 301 | 15250   | 1.8 | 20.5320 | 1.8  | 0.1283 | 3.4  | 0.0191 | 2.8 | 0.84 | 122.0 | 3.4 | 122.5 | 3.9  | 133.6 | 42.5 | 122.0 | 3.4 |
| WP87 Spot 90  | 264 | 16159   | 1.6 | 20.1418 | 1.8  | 0.1308 | 3.5  | 0.0191 | 2.9 | 0.85 | 122.1 | 3.6 | 124.9 | 4.1  | 178.5 | 42.8 | 122.1 | 3.6 |
| WP87 Spot 8   | 381 | 17351   | 2.2 | 20.8179 | 1.7  | 0.1267 | 3.7  | 0.0191 | 3.3 | 0.89 | 122.2 | 4.0 | 121.1 | 4.2  | 101.0 | 40.2 | 122.2 | 4.0 |
| WP87 Spot 5   | 278 | 14823   | 2.1 | 21.4064 | 1.8  | 0.1232 | 3.8  | 0.0191 | 3.4 | 0.88 | 122.2 | 4.1 | 118.0 | 4.3  | 34.7  | 42.6 | 122.2 | 4.1 |
| WP87 Spot 88  | 143 | 6279    | 2.3 | 21.3225 | 2.5  | 0.1237 | 3.8  | 0.0191 | 2.8 | 0.74 | 122.2 | 3.4 | 118.4 | 4.2  | 44.1  | 60.8 | 122.2 | 3.4 |
| WP87 Spot 28  | 230 | 21717   | 2.7 | 20.8421 | 1.7  | 0.1266 | 3.4  | 0.0191 | 2.9 | 0.87 | 122.3 | 3.6 | 121.0 | 3.9  | 98.2  | 40.0 | 122.3 | 3.6 |
| WP87 Spot 26  | 106 | 1287    | 2.7 | 24.6636 | 14.8 | 0.1070 | 15.3 | 0.0191 | 3.8 | 0.25 | 122.3 | 4.6 | 103.2 | 15.0 | NA    | NA   | 122.3 | 4.6 |
| WP87 Spot 14  | 161 | 3551    | 3.1 | 21.4503 | 3.0  | 0.1230 | 4.5  | 0.0192 | 3.3 | 0.74 | 122.3 | 4.0 | 117.8 | 5.0  | 29.8  | 72.8 | 122.3 | 4.0 |
| WP87 Spot 81  | 158 | 44986   | 2.3 | 20.1361 | 2.5  | 0.1312 | 4.0  | 0.0192 | 3.1 | 0.77 | 122.4 | 3.7 | 125.2 | 4.7  | 179.2 | 58.2 | 122.4 | 3.7 |
| WP87 Spot 36  | 101 | 7024    | 2.9 | 19.6599 | 4.0  | 0.1344 | 4.9  | 0.0192 | 2.9 | 0.59 | 122.5 | 3.6 | 128.1 | 5.9  | 234.7 | 91.8 | 122.5 | 3.6 |
| WP87 Spot 79  | 246 | 7086    | 2.3 | 20.2621 | 2.7  | 0.1305 | 3.4  | 0.0192 | 2.2 | 0.64 | 122.5 | 2.7 | 124.6 | 4.0  | 164.6 | 62.1 | 122.5 | 2.7 |
| WP87 Spot 32  | 163 | 51478   | 2.7 | 20.8129 | 2.3  | 0.1272 | 3.5  | 0.0192 | 2.7 | 0.76 | 122.6 | 3.2 | 121.5 | 4.0  | 101.6 | 54.1 | 122.6 | 3.2 |
| WP87 Spot 51  | 163 | 11659   | 3.1 | 21.2738 | 1.9  | 0.1245 | 3.5  | 0.0192 | 3.0 | 0.85 | 122.7 | 3.6 | 119.1 | 3.9  | 49.6  | 44.3 | 122.7 | 3.6 |
| WP87 Spot 44  | 150 | 4448    | 2.3 | 21.8303 | 2.0  | 0.1214 | 3.4  | 0.0192 | 2.7 | 0.80 | 122.7 | 3.3 | 116.3 | 3.7  | NA    | NA   | 122.7 | 3.3 |
| WP87 Spot 103 | 154 | 1942    | 2.7 | 23.3923 | 8.3  | 0.1133 | 8.7  | 0.0192 | 2.5 | 0.28 | 122.8 | 3.0 | 109.0 | 9.0  | NA    | NA   | 122.8 | 3.0 |
| WP87 Spot 4   | 158 | 2703714 | 1.8 | 19.9899 | 2.8  | 0.1327 | 4.1  | 0.0193 | 3.0 | 0.73 | 122.9 | 3.6 | 126.6 | 4.9  | 196.2 | 64.7 | 122.9 | 3.6 |
| WP87 Spot 69  | 103 | 21343   | 3.0 | 20.7246 | 1.8  | 0.1280 | 3.2  | 0.0193 | 2.6 | 0.81 | 122.9 | 3.1 | 122.3 | 3.7  | 111.7 | 43.5 | 122.9 | 3.1 |
| WP87 Spot 19  | 154 | 88722   | 1.8 | 19.9478 | 1.9  | 0.1330 | 4.1  | 0.0193 | 3.7 | 0.88 | 122.9 | 4.5 | 126.8 | 4.9  | 201.1 | 45.2 | 122.9 | 4.5 |
| WP87 Spot 82  | 171 | 2236    | 1.8 | 23.1152 | 5.7  | 0.1148 | 6.3  | 0.0193 | 2.7 | 0.43 | 123.0 | 3.3 | 110.4 | 6.6  | NA    | NA   | 123.0 | 3.3 |
| WP87 Spot 73  | 530 | 5234    | 1.7 | 21.6620 | 1.7  | 0.1226 | 3.4  | 0.0193 | 3.0 | 0.87 | 123.0 | 3.7 | 117.4 | 3.8  | 6.2   | 40.5 | 123.0 | 3.7 |
| WP87 Spot 61  | 249 | 5935    | 2.0 | 21.7706 | 1.6  | 0.1220 | 3.8  | 0.0193 | 3.4 | 0.90 | 123.1 | 4.2 | 116.9 | 4.2  | NA    | NA   | 123.1 | 4.2 |
| WP87 Spot 67  | 194 | 15072   | 2.8 | 21.3059 | 2.4  | 0.1249 | 4.1  | 0.0193 | 3.3 | 0.81 | 123.2 | 4.0 | 119.5 | 4.6  | 45.9  | 58.2 | 123.2 | 4.0 |
| WP87 Spot 13  | 181 | 1724    | 1.8 | 23.7878 | 2.7  | 0.1119 | 4.4  | 0.0193 | 3.5 | 0.79 | 123.3 | 4.3 | 107.7 | 4.5  | NA    | NA   | 123.3 | 4.3 |
| WP87 Spot 52  | 200 | 2301    | 2.3 | 23.3390 | 2.9  | 0.1141 | 4.3  | 0.0193 | 3.2 | 0.73 | 123.3 | 3.9 | 109.7 | 4.5  | NA    | NA   | 123.3 | 3.9 |
| WP87 Spot 18  | 145 | 1381    | 2.5 | 24.0913 | 3.6  | 0.1105 | 4.4  | 0.0193 | 2.5 | 0.57 | 123.3 | 3.1 | 106.4 | 4.5  | NA    | NA   | 123.3 | 3.1 |
| WP87 Spot 62  | 323 | 4091    | 1.8 | 21.1913 | 2.0  | 0.1256 | 3.4  | 0.0193 | 2.8 | 0.81 | 123.4 | 3.4 | 120.2 | 3.9  | 58.8  | 47.9 | 123.4 | 3.4 |
| WP87 Spot 106 | 180 | 5306    | 2.3 | 21.5332 | 2.1  | 0.1237 | 4.0  | 0.0193 | 3.3 | 0.84 | 123.4 | 4.1 | 118.4 | 4.4  | 20.5  | 51.5 | 123.4 | 4.1 |
| WP87 Spot 89  | 149 | 1440    | 2.6 | 24.6770 | 4.6  | 0.1079 | 5.4  | 0.0193 | 2.8 | 0.52 | 123.4 | 3.4 | 104.1 | 5.3  | NA    | NA   | 123.4 | 3.4 |
| WP87 Spot 54  | 204 | 143755  | 1.7 | 19.9513 | 2.0  | 0.1335 | 3.2  | 0.0193 | 2.4 | 0.76 | 123.4 | 2.9 | 127.2 | 3.8  | 200.6 | 47.4 | 123.4 | 2.9 |
| WP87 Spot 53  | 122 | 2005    | 2.8 | 23.8039 | 3.9  | 0.1119 | 5.1  | 0.0193 | 3.3 | 0.65 | 123.4 | 4.0 | 107.7 | 5.2  | NA    | NA   | 123.4 | 4.0 |
| WP87 Spot 95  | 157 | 1669    | 2.3 | 25.1847 | 4.8  | 0.1059 | 5.5  | 0.0194 | 2.7 | 0.50 | 123.6 | 3.4 | 102.2 | 5.4  | NA    | NA   | 123.6 | 3.4 |
| WP87 Spot 92  | 114 | 1380    | 2.6 | 25.3125 | 3.1  | 0.1054 | 4.5  | 0.0194 | 3.2 | 0.72 | 123.6 | 3.9 | 101.8 | 4.3  | NA    | NA   | 123.6 | 3.9 |
| WP87 Spot 38  | 261 | 77026   | 2.9 | 20.8032 | 1.7  | 0.1284 | 3.6  | 0.0194 | 3.2 | 0.89 | 123.7 | 3.9 | 122.7 | 4.2  | 102.7 | 40.0 | 123.7 | 3.9 |
| WP87 Spot 27  | 252 | 2605    | 2.7 | 23.1590 | 2.0  | 0.1154 | 3.5  | 0.0194 | 2.9 | 0.82 | 123.8 | 3.5 | 110.9 | 3.7  | NA    | NA   | 123.8 | 3.5 |
| WP87 Spot 25  | 529 | 34718   | 2.0 | 20.7385 | 1.5  | 0.1289 | 3.4  | 0.0194 | 3.1 | 0.90 | 123.8 | 3.8 | 123.1 | 4.0  | 110.1 | 35.3 | 123.8 | 3.8 |
| WP87 Spot 84  | 191 | 1909    | 1.7 | 24.4851 | 1.7  | 0.1092 | 4.1  | 0.0194 | 3.7 | 0.91 | 123.9 | 4.6 | 105.3 | 4.1  | NA    | NA   | 123.9 | 4.6 |
| WP87 Spot 105 | 203 | 4870    | 2.3 | 21.5367 | 2.1  | 0.1242 | 3.6  | 0.0194 | 2.9 | 0.81 | 124.0 | 3.6 | 118.9 | 4.0  | 20.2  | 50.4 | 124.0 | 3.6 |
| WP87 Spot 45  | 178 | 2049    | 1.7 | 23.6247 | 4.3  | 0.1134 | 4.8  | 0.0194 | 2.1 | 0.45 | 124.1 | 2.6 | 109.0 | 4.9  | NA    | NA   | 124.1 | 2.6 |
| WP87 Spot 16  | 112 | 3384    | 2.5 | 22.5137 | 2.1  | 0.1190 | 3.6  | 0.0194 | 2.9 | 0.80 | 124.1 | 3.6 | 114.2 | 3.9  | NA    | NA   | 124.1 | 3.6 |
| WP87 Spot 37  | 199 | 13719   | 2.4 | 20.6323 | 1.9  | 0.1300 | 3.7  | 0.0195 | 3.1 | 0.85 | 124.2 | 3.8 | 124.1 | 4.3  | 122.2 | 45.1 | 124.2 | 3.8 |
| WP87 Spot 7   | 250 | 2472    | 2.2 | 23.3229 | 7.1  | 0.1151 | 7.6  | 0.0195 | 2.6 | 0.34 | 124.4 | 3.2 | 110.6 | 7.9  | NA    | NA   | 124.4 | 3.2 |
| WP87 Spot 58  | 267 | 8174    | 2.5 | 20.6720 | 2.5  | 0.1299 | 4.4  | 0.0195 | 3.6 | 0.82 | 124.4 | 4.4 | 124.0 | 5.1  | 117.6 | 58.7 | 124.4 | 4.4 |
| WP87 Spot 76  | 163 | 6075    | 2.4 | 20.9670 | 2.3  | 0.1282 | 3.8  | 0.0195 | 3.1 | 0.80 | 124.5 | 3.8 | 122.4 | 4.4  | 84.1  | 54.9 | 124.5 | 3.8 |
| WP87 Spot 102 | 32  |         |     |         |      |        |      |        |     |      |       |     |       |      |       |      |       |     |

|               |     |       |     |         |     |        |     |        |     |      |       |     |       |      |       |       |       |     |
|---------------|-----|-------|-----|---------|-----|--------|-----|--------|-----|------|-------|-----|-------|------|-------|-------|-------|-----|
| WP87 Spot 87  | 385 | 9826  | 1.7 | 21.1309 | 1.9 | 0.1284 | 3.8 | 0.0197 | 3.3 | 0.86 | 125.7 | 4.1 | 122.7 | 4.4  | 65.6  | 45.9  | 125.7 | 4.1 |
| WP87 Spot 9   | 154 | 1679  | 2.3 | 25.0751 | 2.3 | 0.1083 | 4.1 | 0.0197 | 3.4 | 0.83 | 125.8 | 4.2 | 104.4 | 4.0  | NA    | NA    | 125.8 | 4.2 |
| WP87 Spot 107 | 173 | 53144 | 1.8 | 20.4494 | 2.4 | 0.1329 | 3.8 | 0.0197 | 3.0 | 0.79 | 125.9 | 3.8 | 126.7 | 4.6  | 143.1 | 55.2  | 125.9 | 3.8 |
| WP87 Spot 72  | 225 | 2238  | 1.7 | 23.4093 | 2.6 | 0.1161 | 4.4 | 0.0197 | 3.5 | 0.80 | 125.9 | 4.4 | 111.5 | 4.6  | NA    | NA    | 125.9 | 4.4 |
| WP87 Spot 104 | 265 | 6651  | 2.1 | 21.2147 | 1.8 | 0.1281 | 3.8 | 0.0197 | 3.4 | 0.88 | 125.9 | 4.2 | 122.4 | 4.4  | 56.2  | 43.9  | 125.9 | 4.2 |
| WP87 Spot 29  | 164 | 4411  | 2.4 | 21.5922 | 1.8 | 0.1260 | 3.4 | 0.0197 | 2.8 | 0.84 | 126.0 | 3.5 | 120.5 | 3.8  | 13.9  | 43.8  | 126.0 | 3.5 |
| WP87 Spot 41  | 142 | 2279  | 2.3 | 23.9819 | 1.8 | 0.1137 | 3.6 | 0.0198 | 3.2 | 0.88 | 126.3 | 4.0 | 109.3 | 3.8  | NA    | NA    | 126.3 | 4.0 |
| WP87 Spot 46  | 242 | 75769 | 1.6 | 20.0199 | 1.9 | 0.1364 | 3.3 | 0.0198 | 2.7 | 0.82 | 126.5 | 3.4 | 129.8 | 4.1  | 192.7 | 44.6  | 126.5 | 3.4 |
| WP87 Spot 93  | 159 | 2065  | 2.5 | 23.6295 | 3.7 | 0.1162 | 4.9 | 0.0199 | 3.2 | 0.66 | 127.1 | 4.1 | 111.6 | 5.2  | NA    | NA    | 127.1 | 4.1 |
| WP87 Spot 66  | 445 | 13932 | 1.3 | 20.8396 | 1.5 | 0.1320 | 4.7 | 0.0200 | 4.4 | 0.95 | 127.4 | 5.6 | 125.9 | 5.5  | 98.5  | 34.4  | 127.4 | 5.6 |
| WP87 Spot 49  | 196 | 21411 | 1.8 | 20.7416 | 2.3 | 0.1327 | 3.5 | 0.0200 | 2.6 | 0.74 | 127.5 | 3.2 | 126.5 | 4.1  | 109.7 | 54.8  | 127.5 | 3.2 |
| WP87 Spot 57  | 201 | 33920 | 2.3 | 20.7966 | 2.0 | 0.1324 | 3.7 | 0.0200 | 3.1 | 0.84 | 127.5 | 3.9 | 126.3 | 4.4  | 103.5 | 47.5  | 127.5 | 3.9 |
| WP87 Spot 20  | 263 | 33615 | 1.7 | 20.3292 | 1.8 | 0.1361 | 3.4 | 0.0201 | 2.9 | 0.85 | 128.2 | 3.7 | 129.6 | 4.1  | 156.9 | 41.5  | 128.2 | 3.7 |
| WP87 Spot 48  | 205 | 3992  | 2.0 | 21.6329 | 2.8 | 0.1280 | 3.7 | 0.0201 | 2.4 | 0.65 | 128.2 | 3.1 | 122.3 | 4.3  | 9.4   | 68.2  | 128.2 | 3.1 |
| WP87 Spot 97  | 124 | 3743  | 2.3 | 22.9092 | 3.0 | 0.1210 | 4.4 | 0.0201 | 3.2 | 0.73 | 128.4 | 4.1 | 116.0 | 4.9  | NA    | NA    | 128.4 | 4.1 |
| WP87 Spot 101 | 314 | 12932 | 2.1 | 20.5743 | 2.0 | 0.1349 | 3.4 | 0.0201 | 2.8 | 0.82 | 128.5 | 3.6 | 128.5 | 4.1  | 128.8 | 46.0  | 128.5 | 3.6 |
| WP87 Spot 34  | 165 | 1337  | 2.1 | 18.8353 | 7.2 | 0.1478 | 8.0 | 0.0202 | 3.6 | 0.45 | 128.9 | 4.6 | 139.9 | 10.5 | 332.7 | 162.6 | 128.9 | 4.6 |
| WP87 Spot 43  | 232 | 34264 | 1.8 | 20.9147 | 1.8 | 0.1346 | 3.8 | 0.0204 | 3.4 | 0.89 | 130.3 | 4.4 | 128.2 | 4.6  | 90.1  | 42.0  | 130.3 | 4.4 |
| WP87 Spot 65  | 223 | 13009 | 1.7 | 20.7020 | 2.2 | 0.1365 | 3.2 | 0.0205 | 2.4 | 0.73 | 130.9 | 3.1 | 129.9 | 3.9  | 114.2 | 52.0  | 130.9 | 3.1 |
| WP87 Spot 63  | 124 | 12924 | 1.4 | 18.5279 | 1.8 | 0.3701 | 3.6 | 0.0498 | 3.2 | 0.88 | 313.0 | 9.7 | 319.7 | 10.0 | 369.9 | 39.7  | 313.0 | 9.7 |

**JT13LA (Beaver Lake Formation sandstone from Beaver Lake)**

|                 |     |        |     |         |     |        |      |        |     |      |       |     |       |      |       |       |       |       |
|-----------------|-----|--------|-----|---------|-----|--------|------|--------|-----|------|-------|-----|-------|------|-------|-------|-------|-------|
| JT13LA Spot 96  | 401 | 7407   | 3.5 | 21.8642 | 1.9 | 0.0608 | 3.8  | 0.0096 | 3.3 | 0.86 | 61.9  | 2.0 | 59.9  | 2.2  | NA    | NA    | 61.9  | 2.0   |
| JT13LA Spot 82  | 108 | 2761   | 4.2 | 22.9693 | 2.7 | 0.1092 | 3.8  | 0.0182 | 2.7 | 0.70 | 116.3 | 3.1 | 105.2 | 3.8  | NA    | NA    | 116.3 | 3.1   |
| JT13LA Spot 46  | 188 | 9729   | 2.7 | 20.8472 | 2.2 | 0.1211 | 2.9  | 0.0183 | 1.9 | 0.65 | 117.1 | 2.2 | 116.1 | 3.2  | 97.7  | 52.1  | 117.1 | 2.2   |
| JT13LA Spot 20  | 158 | 8727   | 4.3 | 20.7766 | 2.6 | 0.1222 | 3.9  | 0.0184 | 2.9 | 0.74 | 117.7 | 3.4 | 117.1 | 4.4  | 105.7 | 62.6  | 117.7 | 3.4   |
| JT13LA Spot 47  | 231 | 80126  | 2.8 | 20.5422 | 2.2 | 0.1242 | 3.7  | 0.0185 | 3.0 | 0.81 | 118.2 | 3.5 | 118.9 | 4.2  | 132.5 | 52.1  | 118.2 | 3.5   |
| JT13LA Spot 29  | 97  | 7802   | 3.4 | 21.2134 | 3.0 | 0.1204 | 4.2  | 0.0185 | 2.9 | 0.69 | 118.4 | 3.4 | 115.4 | 4.6  | 56.3  | 72.6  | 118.4 | 3.4   |
| JT13LA Spot 32  | 131 | 78751  | 3.8 | 21.1356 | 2.3 | 0.1209 | 3.0  | 0.0185 | 1.9 | 0.64 | 118.4 | 2.3 | 115.9 | 3.3  | 65.1  | 55.2  | 118.4 | 2.3   |
| JT13LA Spot 38  | 84  | 28626  | 2.9 | 20.7810 | 2.6 | 0.1239 | 3.9  | 0.0187 | 2.9 | 0.75 | 119.3 | 3.4 | 118.6 | 4.4  | 105.2 | 61.6  | 119.3 | 3.4   |
| JT13LA Spot 61  | 374 | 40076  | 1.5 | 20.4276 | 1.4 | 0.1262 | 3.6  | 0.0187 | 3.3 | 0.92 | 119.4 | 4.0 | 120.6 | 4.1  | 145.6 | 33.5  | 119.4 | 4.0   |
| JT13LA Spot 33  | 154 | 37579  | 3.3 | 21.2515 | 2.1 | 0.1214 | 3.3  | 0.0187 | 2.5 | 0.77 | 119.5 | 3.0 | 116.3 | 3.6  | 52.0  | 49.3  | 119.5 | 3.0   |
| JT13LA Spot 95  | 147 | 14209  | 3.3 | 21.5853 | 1.9 | 0.1206 | 3.2  | 0.0189 | 2.6 | 0.81 | 120.6 | 3.1 | 115.6 | 3.5  | 14.7  | 44.8  | 120.6 | 3.1   |
| JT13LA Spot 66  | 74  | 7758   | 3.8 | 21.2679 | 3.1 | 0.1226 | 4.5  | 0.0189 | 3.3 | 0.72 | 120.8 | 3.9 | 117.4 | 5.0  | 50.2  | 74.4  | 120.8 | 3.9   |
| JT13LA Spot 3   | 129 | 2012   | 3.7 | 22.5866 | 2.4 | 0.1160 | 3.5  | 0.0190 | 2.5 | 0.72 | 121.4 | 3.0 | 111.5 | 3.7  | NA    | NA    | 121.4 | 3.0   |
| JT13LA Spot 98  | 230 | 56246  | 2.1 | 20.0908 | 2.1 | 0.1312 | 3.7  | 0.0191 | 3.1 | 0.83 | 122.2 | 3.8 | 125.4 | 4.4  | 184.4 | 48.7  | 122.2 | 3.8   |
| JT13LA Spot 103 | 72  | 3779   | 3.7 | 17.9439 | 5.0 | 0.1472 | 5.8  | 0.0192 | 3.0 | 0.51 | 122.4 | 3.6 | 139.5 | 7.6  | 441.6 | 112.2 | 122.4 | 3.6   |
| JT13LA Spot 85  | 131 | 8959   | 3.5 | 21.1300 | 2.4 | 0.1268 | 3.5  | 0.0194 | 2.6 | 0.74 | 124.1 | 3.1 | 121.2 | 4.0  | 65.7  | 56.1  | 124.1 | 3.1   |
| JT13LA Spot 101 | 169 | 80760  | 2.8 | 20.5064 | 2.0 | 0.1307 | 3.5  | 0.0194 | 2.9 | 0.82 | 124.2 | 3.5 | 124.7 | 4.1  | 136.5 | 47.0  | 124.2 | 3.5   |
| JT13LA Spot 2   | 205 | 9766   | 2.2 | 20.8943 | 2.5 | 0.1291 | 3.5  | 0.0196 | 2.5 | 0.71 | 124.9 | 3.1 | 123.3 | 4.1  | 92.4  | 59.4  | 124.9 | 3.1   |
| JT13LA Spot 6   | 187 | 13056  | 3.8 | 21.1101 | 1.6 | 0.1280 | 3.1  | 0.0196 | 2.7 | 0.86 | 125.2 | 3.3 | 122.3 | 3.6  | 68.0  | 38.7  | 125.2 | 3.3   |
| JT13LA Spot 45  | 53  | 998    | 3.9 | 28.9261 | 3.8 | 0.0943 | 4.5  | 0.0198 | 2.6 | 0.56 | 126.4 | 3.2 | 91.5  | 4.0  | NA    | NA    | 126.4 | 3.2   |
| JT13LA Spot 39  | 111 | 6044   | 3.5 | 22.0819 | 3.7 | 0.1236 | 4.6  | 0.0198 | 2.7 | 0.60 | 126.4 | 3.4 | 118.3 | 5.1  | NA    | NA    | 126.4 | 3.4   |
| JT13LA Spot 14  | 226 | 13775  | 2.3 | 21.1984 | 1.8 | 0.1290 | 3.7  | 0.0198 | 3.3 | 0.87 | 126.6 | 4.1 | 123.2 | 4.3  | 58.0  | 43.1  | 126.6 | 4.1   |
| JT13LA Spot 16  | 74  | 25045  | 3.9 | 19.1336 | 2.8 | 0.1433 | 3.8  | 0.0199 | 2.6 | 0.67 | 127.0 | 3.2 | 136.0 | 4.9  | 297.0 | 64.4  | 127.0 | 3.2   |
| JT13LA Spot 26  | 60  | 2073   | 3.9 | 26.0820 | 3.5 | 0.1052 | 4.3  | 0.0199 | 2.4 | 0.57 | 127.1 | 3.1 | 101.5 | 4.1  | NA    | NA    | 127.1 | 3.1   |
| JT13LA Spot 28  | 98  | 3393   | 4.4 | 22.9168 | 3.8 | 0.1197 | 5.0  | 0.0199 | 3.3 | 0.65 | 127.1 | 4.1 | 114.8 | 5.4  | NA    | NA    | 127.1 | 4.1   |
| JT13LA Spot 59  | 80  | 4498   | 3.8 | 23.1869 | 3.5 | 0.1187 | 4.6  | 0.0200 | 3.0 | 0.65 | 127.5 | 3.8 | 113.9 | 5.0  | NA    | NA    | 127.5 | 3.8   |
| JT13LA Spot 92  | 83  | 3614   | 2.6 | 22.2299 | 2.9 | 0.1240 | 3.8  | 0.0200 | 2.5 | 0.65 | 127.6 | 3.1 | 118.7 | 4.3  | NA    | NA    | 127.6 | 3.1   |
| JT13LA Spot 105 | 78  | 20065  | 3.0 | 20.3594 | 2.9 | 0.1359 | 4.6  | 0.0201 | 3.6 | 0.78 | 128.2 | 4.5 | 129.4 | 5.6  | 153.4 | 67.5  | 128.2 | 4.5   |
| JT13LA Spot 23  | 168 | 17319  | 3.2 | 20.7795 | 2.3 | 0.1333 | 3.4  | 0.0201 | 2.5 | 0.74 | 128.3 | 3.1 | 127.1 | 4.0  | 105.4 | 53.6  | 128.3 | 3.1   |
| JT13LA Spot 104 | 132 | 36949  | 3.1 | 20.7405 | 2.6 | 0.1336 | 3.9  | 0.0201 | 2.8 | 0.73 | 128.3 | 3.6 | 127.3 | 4.6  | 109.8 | 62.3  | 128.3 | 3.6   |
| JT13LA Spot 93  | 57  | 1184   | 3.8 | 25.8293 | 3.0 | 0.1073 | 4.1  | 0.0201 | 2.8 | 0.68 | 128.4 | 3.6 | 103.5 | 4.1  | NA    | NA    | 128.4 | 3.6   |
| JT13LA Spot 68  | 55  | 7136   | 3.8 | 22.2202 | 3.2 | 0.1248 | 4.8  | 0.0201 | 3.7 | 0.76 | 128.4 | 4.7 | 119.4 | 5.4  | NA    | NA    | 128.4 | 4.7   |
| JT13LA Spot 65  | 210 | 8044   | 2.9 | 21.2217 | 2.1 | 0.1308 | 3.4  | 0.0201 | 2.7 | 0.79 | 128.5 | 3.4 | 124.8 | 4.0  | 55.4  | 50.0  | 128.5 | 3.4   |
| JT13LA Spot 25  | 102 | 9132   | 4.0 | 21.3218 | 2.4 | 0.1308 | 3.5  | 0.0202 | 2.6 | 0.74 | 129.2 | 3.3 | 124.8 | 4.2  | 44.1  | 57.0  | 129.2 | 3.3   |
| JT13LA Spot 67  | 41  | 1784   | 4.6 | 22.1245 | 9.8 | 0.1261 | 10.4 | 0.0202 | 3.5 | 0.34 | 129.2 | 4.5 | 120.6 | 11.9 | NA    | NA    | 129.2 | 4.5   |
| JT13LA Spot 87  | 97  | 8604   | 3.4 | 20.7544 | 2.2 | 0.1346 | 3.3  | 0.0203 | 2.4 | 0.73 | 129.4 | 3.0 | 128.2 | 3.9  | 108.2 | 52.6  | 129.4 | 3.0   |
| JT13LA Spot 15  | 100 | 3176   | 2.8 | 22.6051 | 2.8 | 0.1237 | 4.7  | 0.0203 | 3.8 | 0.81 | 129.4 | 4.8 | 118.4 | 5.2  | NA    | NA    | 129.4 | 4.8   |
| JT13LA Spot 110 | 122 | 6030   | 3.1 | 21.5790 | 2.5 | 0.1296 | 4.0  | 0.0203 | 3.1 | 0.78 | 129.5 | 4.0 | 123.7 | 4.7  | 15.4  | 60.9  | 129.5 | 4.0   |
| JT13LA Spot 5   | 142 | 6097   | 2.6 | 21.4289 | 3.4 | 0.1305 | 4.2  | 0.0203 | 2.4 | 0.58 | 129.5 | 3.1 | 124.5 | 4.9  | 32.1  | 81.3  | 129.5 | 3.1   |
| JT13LA Spot 97  | 59  | 6455   | 4.0 | 20.4667 | 2.8 | 0.1369 | 4.5  | 0.0203 | 3.5 | 0.77 | 129.7 | 4.4 | 130.2 | 5.4  | 141.1 | 66.2  | 129.7 | 4.4   |
| JT13LA Spot 50  | 79  | 7393   | 3.2 | 20.9436 | 2.7 | 0.1338 | 3.7  | 0.0203 | 2.4 | 0.66 | 129.7 | 3.1 | 127.5 | 4.4  | 86.8  | 65.1  | 129.7 | 3.1   |
| JT13LA Spot 53  | 142 | 33873  | 3.6 | 20.3859 | 2.1 | 0.1383 | 3.5  | 0.0205 | 2.9 | 0.81 | 130.6 | 3.7 | 131.6 | 4.4  | 150.4 | 48.8  | 130.6 | 3.7   |
| JT13LA Spot 58  | 86  | 106350 | 2.5 | 20.5392 | 2.8 | 0.1377 | 4.3  | 0.0205 | 3.2 | 0.75 | 130.9 | 4.2 | 131.0 | 5.3  | 132.8 | 67.0  | 130.9 | 4.2   |
| JT13LA Spot 13  | 107 | 7231   | 4.2 | 22.0675 | 2.5 | 0.1285 | 3.6  | 0.0206 | 2.6 | 0.72 | 131.3 | 3.3 | 122.8 | 4.1  | NA    | NA    | 131.3 | 3.3   |
| JT13LA Spot 17  | 105 | 28825  | 3.9 | 20.9397 | 2.3 | 0.1357 | 3.7  | 0.0206 | 2.9 | 0.78 | 131.6 | 3.8 | 129.2 | 4.5  | 87.2  | 54.3  | 131.6 | 3.8   |
| JT13LA Spot 80  | 43  | 2274   | 5.2 | 21.7380 | 4.9 | 0.1308 | 5.8  | 0.0206 | 3.1 | 0.53 | 131.7 | 4.0 | 124.9 | 6.8  | NA    | NA    | 131.7 | 4.0   |
| JT13LA Spot 91  | 127 | 29313  | 2.7 | 20.1224 | 2.5 | 0.1416 | 3.6  | 0.0207 | 2.5 | 0.71 | 131.9 | 3.3 | 134.5 | 4.5  | 180.8 | 58.9  | 131.9 | 3.3   |
| JT13LA Spot 10  | 150 | 4891   | 4.0 | 22.1713 | 3.9 | 0.1290 | 4.9  | 0.0207 | 3.1 | 0.63 | 132.4 | 4.0 | 123.2 | 5.7  | NA    | NA    | 132.4 | 4.0</ |

|                 |     |         |       |         |     |        |     |        |     |      |        |      |        |      |        |       |        |      |
|-----------------|-----|---------|-------|---------|-----|--------|-----|--------|-----|------|--------|------|--------|------|--------|-------|--------|------|
| JT13LA Spot 63  | 62  | 8479    | 2.9   | 19.7775 | 3.5 | 0.1643 | 4.7 | 0.0236 | 3.1 | 0.66 | 150.2  | 4.6  | 154.4  | 6.7  | 220.9  | 81.8  | 150.2  | 4.6  |
| JT13LA Spot 77  | 67  | 14471   | 1.6   | 21.1090 | 3.2 | 0.1542 | 4.1 | 0.0236 | 2.6 | 0.62 | 150.5  | 3.8  | 145.6  | 5.6  | 68.1   | 76.9  | 150.5  | 3.8  |
| JT13LA Spot 102 | 179 | 20950   | 1.9   | 20.4663 | 1.8 | 0.1591 | 3.9 | 0.0236 | 3.4 | 0.88 | 150.6  | 5.1  | 149.9  | 5.4  | 141.2  | 42.8  | 150.6  | 5.1  |
| JT13LA Spot 90  | 291 | 34906   | 2.1   | 20.4126 | 1.8 | 0.1599 | 2.8 | 0.0237 | 2.1 | 0.77 | 150.9  | 3.1  | 150.6  | 3.9  | 147.3  | 41.4  | 150.9  | 3.1  |
| JT13LA Spot 44  | 232 | 68484   | 4.1   | 19.7564 | 1.6 | 0.1654 | 2.8 | 0.0237 | 2.3 | 0.83 | 151.1  | 3.5  | 155.4  | 4.1  | 223.4  | 36.0  | 151.1  | 3.5  |
| JT13LA Spot 79  | 294 | 27986   | 2.5   | 20.4417 | 1.6 | 0.1606 | 3.4 | 0.0238 | 3.0 | 0.89 | 151.7  | 4.5  | 151.2  | 4.8  | 144.0  | 36.4  | 151.7  | 4.5  |
| JT13LA Spot 27  | 250 | 36458   | 4.0   | 20.8833 | 1.9 | 0.1574 | 4.1 | 0.0238 | 3.7 | 0.89 | 151.9  | 5.5  | 148.4  | 5.7  | 93.6   | 44.2  | 151.9  | 5.5  |
| JT13LA Spot 78  | 116 | 6464    | 2.8   | 21.7180 | 2.7 | 0.1519 | 3.6 | 0.0239 | 2.4 | 0.66 | 152.5  | 3.6  | 143.6  | 4.9  | NA     | NA    | 152.5  | 3.6  |
| JT13LA Spot 34  | 465 | 48680   | 6.1   | 20.5865 | 1.3 | 0.1612 | 3.5 | 0.0241 | 3.2 | 0.93 | 153.4  | 4.9  | 151.7  | 4.9  | 127.4  | 29.5  | 153.4  | 4.9  |
| JT13LA Spot 99  | 378 | 66267   | 4.0   | 20.4468 | 1.5 | 0.1624 | 2.9 | 0.0241 | 2.5 | 0.85 | 153.4  | 3.7  | 152.8  | 4.1  | 143.4  | 36.1  | 153.4  | 3.7  |
| JT13LA Spot 107 | 330 | 20811   | 3.3   | 20.3167 | 1.8 | 0.1636 | 3.6 | 0.0241 | 3.1 | 0.87 | 153.6  | 4.8  | 153.9  | 5.2  | 158.4  | 42.1  | 153.6  | 4.8  |
| JT13LA Spot 60  | 342 | 31024   | 3.2   | 20.1233 | 1.3 | 0.1661 | 3.0 | 0.0242 | 2.7 | 0.91 | 154.4  | 4.1  | 156.0  | 4.3  | 180.7  | 29.2  | 154.4  | 4.1  |
| JT13LA Spot 11  | 490 | 13159   | 1.6   | 21.5889 | 1.9 | 0.1552 | 3.2 | 0.0243 | 2.5 | 0.80 | 154.8  | 3.9  | 146.5  | 4.3  | 14.3   | 45.6  | 154.8  | 3.9  |
| JT13LA Spot 36  | 520 | 40764   | 2.2   | 20.8485 | 1.5 | 0.1618 | 3.3 | 0.0245 | 2.9 | 0.89 | 155.9  | 4.5  | 152.3  | 4.7  | 97.5   | 35.8  | 155.9  | 4.5  |
| JT13LA Spot 30  | 282 | 30145   | 1.9   | 20.7898 | 1.6 | 0.1624 | 3.6 | 0.0245 | 3.2 | 0.89 | 156.0  | 4.9  | 152.8  | 5.1  | 104.2  | 38.0  | 156.0  | 4.9  |
| JT13LA Spot 35  | 81  | 5517    | 3.9   | 21.7234 | 1.9 | 0.1559 | 2.6 | 0.0246 | 1.8 | 0.67 | 156.5  | 2.7  | 147.2  | 3.6  | NA     | NA    | 156.5  | 2.7  |
| JT13LA Spot 64  | 557 | 814822  | 5.9   | 20.2459 | 1.5 | 0.1680 | 5.2 | 0.0247 | 4.9 | 0.95 | 157.1  | 7.6  | 157.6  | 7.5  | 166.5  | 36.0  | 157.1  | 7.6  |
| JT13LA Spot 51  | 75  | 25645   | 3.0   | 21.0783 | 3.1 | 0.1618 | 4.7 | 0.0247 | 3.5 | 0.75 | 157.6  | 5.5  | 152.3  | 6.6  | 71.5   | 73.2  | 157.6  | 5.5  |
| JT13LA Spot 73  | 82  | 5692    | 2.2   | 11.5750 | 6.2 | 0.2963 | 6.9 | 0.0249 | 3.1 | 0.45 | 158.4  | 4.8  | 263.5  | 16.0 | 1347.0 | 118.9 | 158.4  | 4.8  |
| JT13LA Spot 94  | 46  | 6124    | 2.4   | 20.9420 | 3.6 | 0.1650 | 4.9 | 0.0251 | 3.4 | 0.69 | 159.6  | 5.3  | 155.1  | 7.0  | 87.0   | 84.4  | 159.6  | 5.3  |
| JT13LA Spot 84  | 274 | 17697   | 3.4   | 20.6431 | 1.8 | 0.1814 | 3.5 | 0.0272 | 3.0 | 0.85 | 172.9  | 5.1  | 169.3  | 5.4  | 120.9  | 43.3  | 172.9  | 5.1  |
| JT13LA Spot 31  | 714 | 25827   | 3.6   | 16.9089 | 1.9 | 0.3581 | 3.4 | 0.0439 | 2.8 | 0.83 | 277.2  | 7.7  | 310.8  | 9.2  | 572.3  | 42.2  | 277.2  | 7.7  |
| JT13LA Spot 19  | 221 | 74674   | 3.0   | 18.6017 | 1.5 | 0.3293 | 3.3 | 0.0444 | 2.9 | 0.89 | 280.3  | 8.0  | 289.0  | 8.2  | 360.9  | 33.1  | 280.3  | 8.0  |
| JT13LA Spot 71  | 519 | 102466  | 2.7   | 18.9956 | 1.6 | 0.3461 | 3.5 | 0.0477 | 3.1 | 0.88 | 300.4  | 9.0  | 301.8  | 9.0  | 313.5  | 37.2  | 300.4  | 9.0  |
| JT13LA Spot 89  | 774 | 505419  | 3.8   | 19.1296 | 1.4 | 0.3461 | 3.3 | 0.0480 | 3.0 | 0.91 | 302.4  | 8.9  | 301.8  | 8.7  | 297.5  | 31.9  | 302.4  | 8.9  |
| JT13LA Spot 42  | 156 | 109596  | 2.6   | 18.4915 | 1.3 | 0.3584 | 2.7 | 0.0481 | 2.4 | 0.88 | 302.8  | 7.0  | 311.0  | 7.2  | 374.3  | 28.9  | 302.8  | 7.0  |
| JT13LA Spot 70  | 425 | 78487   | 3.7   | 19.1414 | 1.3 | 0.3471 | 3.9 | 0.0482 | 3.6 | 0.94 | 303.5  | 10.8 | 302.5  | 10.1 | 296.0  | 29.3  | 303.5  | 10.8 |
| JT13LA Spot 41  | 600 | 51520   | 4.5   | 19.1334 | 1.3 | 0.3511 | 3.6 | 0.0487 | 3.4 | 0.93 | 306.8  | 10.1 | 305.6  | 9.5  | 297.0  | 29.4  | 306.8  | 10.1 |
| JT13LA Spot 22  | 473 | 243087  | 3.8   | 19.5755 | 1.3 | 0.3521 | 3.0 | 0.0500 | 2.7 | 0.91 | 314.6  | 8.3  | 306.3  | 7.9  | 244.6  | 29.0  | 314.6  | 8.3  |
| JT13LA Spot 83  | 137 | 19148   | 2.6   | 18.1167 | 1.3 | 0.5295 | 3.1 | 0.0696 | 2.9 | 0.91 | 433.8  | 12.0 | 431.5  | 11.0 | 420.2  | 29.5  | 433.8  | 12.0 |
| JT13LA Spot 69  | 77  | 27830   | 2.7   | 17.7458 | 1.4 | 0.5448 | 2.9 | 0.0701 | 2.6 | 0.88 | 437.0  | 10.8 | 441.6  | 10.4 | 466.2  | 30.6  | 437.0  | 10.8 |
| JT13LA Spot 72  | 195 | 103192  | 5.6   | 17.8386 | 1.4 | 0.5457 | 2.8 | 0.0706 | 2.4 | 0.86 | 439.9  | 10.2 | 442.2  | 10.0 | 454.7  | 31.4  | 439.9  | 10.2 |
| JT13LA Spot 62  | 351 | 158767  | 1.9   | 17.5807 | 1.2 | 0.5663 | 2.7 | 0.0722 | 2.5 | 0.90 | 449.6  | 10.7 | 455.6  | 10.0 | 486.9  | 25.8  | 449.6  | 10.7 |
| JT13LA Spot 76  | 177 | 83415   | 4.7   | 17.4655 | 1.5 | 0.5969 | 2.8 | 0.0756 | 2.4 | 0.85 | 470.1  | 10.7 | 475.3  | 10.6 | 501.4  | 32.2  | 470.1  | 10.7 |
| JT13LA Spot 108 | 155 | 66205   | 190.7 | 17.3044 | 1.4 | 0.6828 | 2.8 | 0.0857 | 2.5 | 0.88 | 530.3  | 12.7 | 528.5  | 11.7 | 521.7  | 29.8  | 530.3  | 12.7 |
| JT13LA Spot 43  | 214 | 180448  | 2.4   | 13.5556 | 1.2 | 1.8180 | 2.8 | 0.1788 | 2.5 | 0.90 | 1060.5 | 24.5 | 1052.0 | 18.2 | 1035.2 | 24.0  | 1035.2 | 24.0 |
| JT13LA Spot 54  | 181 | 50812   | 4.0   | 12.2908 | 1.0 | 1.8678 | 5.0 | 0.1666 | 4.9 | 0.98 | 993.2  | 45.2 | 1069.8 | 33.2 | 1230.2 | 20.0  | 1230.2 | 20.0 |
| JT13LA Spot 1   | 40  | 11129   | 2.3   | 11.3871 | 1.3 | 2.9169 | 2.7 | 0.2410 | 2.4 | 0.88 | 1391.9 | 29.7 | 1386.3 | 20.3 | 1378.5 | 24.3  | 1378.5 | 24.3 |
| JT13LA Spot 4   | 57  | 28563   | 0.6   | 10.1325 | 1.2 | 3.6780 | 2.7 | 0.2704 | 2.4 | 0.90 | 1542.9 | 33.1 | 1566.6 | 21.3 | 1599.5 | 21.5  | 1599.5 | 21.5 |
| JT13LA Spot 86  | 135 | 91215   | 1.1   | 9.7865  | 1.3 | 4.0997 | 3.5 | 0.2911 | 3.3 | 0.93 | 1647.1 | 47.3 | 1654.2 | 28.5 | 1664.1 | 23.5  | 1664.1 | 23.5 |
| JT13LA Spot 57  | 75  | 1188977 | 2.3   | 9.5424  | 1.2 | 4.3123 | 3.2 | 0.2986 | 3.0 | 0.93 | 1684.3 | 44.1 | 1695.7 | 26.4 | 1710.7 | 21.4  | 1710.7 | 21.4 |
| JT13LA Spot 81  | 212 | 135657  | 3.4   | 9.3890  | 1.1 | 4.5166 | 3.2 | 0.3077 | 3.0 | 0.94 | 1729.4 | 44.9 | 1734.0 | 26.2 | 1740.5 | 19.9  | 1740.5 | 19.9 |
| JT13LA Spot 74  | 127 | 99836   | 3.5   | 8.8634  | 1.3 | 5.1837 | 3.4 | 0.3334 | 3.1 | 0.92 | 1854.7 | 50.3 | 1849.9 | 28.8 | 1845.4 | 23.7  | 1845.4 | 23.7 |
| JT13LA Spot 56  | 288 | 540275  | 3.2   | 7.8737  | 1.0 | 6.6195 | 3.0 | 0.3782 | 2.8 | 0.94 | 2067.7 | 49.0 | 2062.0 | 26.1 | 2056.9 | 18.1  | 2056.9 | 18.1 |

**JT03LA (Beaver Lake Formation sandstone from Beaver Lake)**

|                 |     |          |     |         |     |        |     |        |     |      |       |     |       |     |       |      |       |     |
|-----------------|-----|----------|-----|---------|-----|--------|-----|--------|-----|------|-------|-----|-------|-----|-------|------|-------|-----|
| JT03LA Spot 119 | 890 | 27799    | 1.6 | 20.6583 | 1.2 | 0.1175 | 2.1 | 0.0176 | 1.8 | 0.84 | 112.6 | 2.0 | 112.8 | 2.2 | 118.2 | 27.2 | 112.6 | 2.0 |
| JT03LA Spot 187 | 655 | 79946    | 2.1 | 20.7525 | 1.5 | 0.1177 | 3.0 | 0.0177 | 2.6 | 0.87 | 113.2 | 2.9 | 112.9 | 3.2 | 107.5 | 35.1 | 113.2 | 2.9 |
| JT03LA Spot 122 | 277 | 10171700 | 2.2 | 20.2911 | 1.5 | 0.1209 | 2.2 | 0.0178 | 1.6 | 0.74 | 113.8 | 1.8 | 115.9 | 2.4 | 160.3 | 34.4 | 113.8 | 1.8 |
| JT03LA Spot 298 | 510 | 13601    | 2.0 | 20.9647 | 1.5 | 0.1179 | 2.8 | 0.0179 | 2.3 | 0.84 | 114.6 | 2.6 | 113.1 | 2.9 | 83.3  | 35.6 | 114.6 | 2.6 |
| JT03LA Spot 304 | 595 | 120094   | 1.3 | 20.3347 | 1.1 | 0.1217 | 1.9 | 0.0180 | 1.6 | 0.83 | 114.7 | 1.8 | 116.6 | 2.1 | 155.2 | 24.7 | 114.7 | 1.8 |
| JT03LA Spot 98  | 577 | 502471   | 1.8 | 19.9447 | 1.1 | 0.1241 | 2.1 | 0.0180 | 1.8 | 0.84 | 114.8 | 2.0 | 118.8 | 2.4 | 200.4 | 26.7 | 114.8 | 2.0 |
| JT03LA Spot 88  | 93  | 5444     | 3.5 | 21.0187 | 2.0 | 0.1182 | 2.5 | 0.0180 | 1.5 | 0.59 | 115.2 | 1.7 | 113.5 | 2.6 | 77.2  | 46.9 | 115.2 | 1.7 |
| JT03LA Spot 93  | 144 | 7945     | 2.3 | 21.2005 | 2.2 | 0.1173 | 2.8 | 0.0181 | 1.7 | 0.61 | 115.3 | 1.9 | 112.7 | 2.9 | 56.8  | 52.0 | 115.3 | 1.9 |
| JT03LA Spot 126 | 633 | 185206   | 1.9 | 20.5212 | 1.0 | 0.1214 | 1.8 | 0.0181 | 1.4 | 0.82 | 115.5 | 1.7 | 116.3 | 1.9 | 133.8 | 23.5 | 115.5 | 1.7 |
| JT03LA Spot 222 | 139 | 5121     | 2.4 | 21.0818 | 2.3 | 0.1183 | 2.6 | 0.0181 | 1.2 | 0.47 | 115.6 | 1.4 | 113.5 | 2.8 | 70.1  | 54.9 | 115.6 | 1.4 |
| JT03LA Spot 62  | 418 | 13556    | 2.3 | 20.8351 | 1.7 | 0.1198 | 2.4 | 0.0181 | 1.7 | 0.71 | 115.7 | 1.9 | 114.9 | 2.6 | 98.1  | 39.8 | 115.7 | 1.9 |
| JT03LA Spot 219 | 466 | 14462    | 2.1 | 20.6940 | 1.7 | 0.1208 | 2.4 | 0.0181 | 1.7 | 0.70 | 115.9 | 1.9 | 115.8 | 2.6 | 114.1 | 39.9 | 115.9 | 1.9 |
| JT03LA Spot 117 | 338 | 27381    | 2.0 | 20.7594 | 1.4 | 0.1205 | 2.3 | 0.0182 | 1.9 | 0.81 | 116.0 | 2.2 | 115.5 | 2.6 | 106.7 | 32.3 | 116.0 | 2.2 |
| JT03LA Spot 238 | 469 | 31211    | 1.2 | 20.6502 | 1.6 | 0.1212 | 2.1 | 0.0182 | 1.4 | 0.67 | 116.0 | 1.6 | 116.2 | 2.3 | 119.1 | 36.7 | 116.0 | 1.6 |
| JT03LA Spot 288 | 85  | 4311     | 3.0 | 21.1598 | 2.9 | 0.1185 | 3.3 | 0.0182 | 1.7 | 0.51 | 116.2 | 2.0 | 113.7 | 3.6 | 61.3  | 68.4 | 116.2 | 2.0 |
| JT03LA Spot 248 | 223 | 32337    | 1.8 | 20.7842 | 1.5 | 0.1208 | 1.9 | 0.0182 | 1.2 | 0.64 | 116.4 | 1.4 | 115.8 | 2.1 | 103.8 | 34.9 | 116.4 | 1.4 |
| JT03LA Spot 152 | 124 | 163081   | 2.7 | 20.2617 | 2.0 | 0.1240 | 2.7 | 0.0182 | 1.8 | 0.67 | 116.4 | 2.1 | 118.7 | 3.0 | 163.7 | 46.3 | 116.4 | 2.1 |
| JT03LA Spot 140 | 213 | 18922    | 2.6 | 21.6999 | 1.7 | 0.1159 | 2.2 | 0.0182 | 1.4 | 0.63 | 116.5 | 1.6 | 111.3 | 2.4 | NA    | NA   | 116.5 | 1.6 |
| JT03LA Spot 106 | 139 | 10255    | 3.1 | 20.5593 | 2.3 | 0.1223 | 2.6 | 0.0182 | 1.3 | 0.49 | 116.6 | 1.5 | 117.2 | 2.9 | 129.5 | 53.5 | 116.6 | 1.5 |
| JT03LA Spot 230 | 179 | 53419    | 3.0 | 20.1085 | 2.1 | 0.1251 | 2.6 | 0.0182 | 1.6 | 0.61 | 116.6 | 1.9 | 119.7 | 3.0 | 181.4 | 48.6 | 116.6 | 1.9 |
| JT03LA Spot 196 | 329 | 24127    | 2.1 | 20.7381 | 1.5 | 0.1213 | 2.4 | 0.0183 | 1.8 | 0.76 | 116.6 | 2.1 | 116.3 | 2.6 | 109.1 | 35.9 | 116.6 | 2.1 |
| JT03LA Spot 218 | 265 | 78918    | 1.6 | 20.1259 | 1.6 | 0.1250 | 2.2 | 0.0183 | 1.6 | 0.71 | 116.6 | 1.8 | 119.6 | 2.5 | 179.3 | 36.3 | 116.6 | 1.8 |
| JT03LA Spot 43  | 216 | 25330    | 2.0 | 20.5360 | 1.8 | 0.1226 | 2.3 | 0.0183 | 1.4 | 0.62 | 116.7 | 1.7 | 117.5 | 2.6 | 132.1 | 42.5 | 116.7 | 1.7 |
| JT03LA Spot 35  | 568 | 27768    | 2.1 | 21.0748 | 1.3 | 0.1195 | 2.3 | 0.0183 | 1.9 | 0.82 | 116.8 | 2.2 | 114.7 | 2.5 | 70.9  | 31.3 | 116.8 | 2.2 |
| JT03LA Spot 309 | 345 | 30737    | 1.4 | 21.1743 | 1.6 | 0.1191 | 2.5 | 0.0183 | 1.9 | 0.77 | 116.9 | 2.2 | 114.2 | 2.7 | 59.7  | 37.1 | 116.9 | 2.2 |
| JT03LA Spot 110 | 411 | 96681    | 2.6 | 20.6653 | 1.2 | 0.1222 | 2.3 | 0.0183 | 1.9 | 0.84 | 117.1 | 2.3 | 117.1 | 2.5 | 117.4 | 29.0 | 117.1 | 2.3 |
| JT03LA Spot 257 | 90  | 5363     | 2.1 | 20.5649 | 2.6 | 0.1229 | 3.0 | 0.0183 | 1.5 | 0.52 | 117.2 | 1.8 | 117.7 | 3.3 | 128.9 | 60.1 | 117.2 | 1.8 |
| JT03LA Spot 206 | 268 | 13050    | 2.2 | 20.8868 | 1.9 | 0.1211 | 2.3 | 0.0184 | 1.3 | 0.55 | 117.3 | 1.5 | 116.1 | 2.5 | 92.1  | 45.8 | 117.3 | 1.5 |
| JT03LA Spot 241 | 429 | 10487    | 2.1 | 20.7251 | 1.5 | 0.1221 | 2.4 | 0.0184 | 1.9 | 0.79 | 117.3 | 2.2 | 117.0 | 2.7 | 110.5 | 34.6 | 117.3 | 2.2 |
| JT03LA Spot 0   | 119 | 92040    | 5.1 | 20.7509 | 2.6 | 0.1220 | 3.0 | 0.0184 | 1.5 | 0.51 | 117.4 | 1.8 | 116.9 | 3.3 | 107.6 | 61.6 | 117.4 | 1.8 |
| JT03LA Spot 105 | 86  | 6989     | 2.5 | 20.8917 | 1.8 | 0.1213 | 2.4 | 0.0184 | 1.5 | 0.64 | 117.5 | 1.8 | 116.3 | 2.6 | 91.6  | 43.5 | 117.5 | 1.8 |
| JT03LA Spot 171 | 137 | 9732     | 3.0 | 21.1779 | 2.2 | 0.1197 | 2.6 | 0.0184 | 1.5 | 0.56 | 117.5 | 1.7 | 114.8 | 2.9 | 59.3  | 52.1 | 117.5 | 1.7 |
| JT03LA Spot 142 | 97  | 118167   | 2.1 | 20.3545 | 1.9 | 0.1247 | 2.4 | 0.0184 | 1.5 | 0.63 | 117.7 | 1.7 | 119.3 | 2.7 | 153.0 | 43.7 | 117.7 | 1.7 |
| JT03LA Spot 78  | 224 | 7580     | 2.5 | 21.1605 | 2.6 | 0.1200 | 3.0 | 0.0184 | 1.4 | 0.48 | 117.7 | 1.6 | 115.1 | 3.2 | 61.2  | 62.0 | 117.7 | 1.6 |
| JT03LA Spot 2   | 97  | 51713    | 2.5 | 20.0968 | 1.9 | 0.1265 | 2.6 | 0.0184 | 1.8 | 0.69 | 117.8 | 2.1 | 121.0 | 2.9 | 182.7 | 43.3 | 117.8 | 2.1 |
| JT03LA Spot 287 | 547 | 35922    | 2.1 | 20.3764 | 1.0 | 0.1248 | 2.1 | 0.0185 | 1.9 | 0.89 | 117.9 | 2.2 | 119.4 | 2.4 | 150.5 | 22.7 | 117.9 | 2.2 |

|                 |      |         |     |         |     |        |     |        |     |      |       |     |       |     |       |      |       |     |
|-----------------|------|---------|-----|---------|-----|--------|-----|--------|-----|------|-------|-----|-------|-----|-------|------|-------|-----|
| JT03LA Spot 17  | 193  | 10733   | 2.2 | 20.5118 | 1.6 | 0.1240 | 2.0 | 0.0185 | 1.2 | 0.63 | 117.9 | 1.5 | 118.7 | 2.2 | 134.9 | 36.5 | 117.9 | 1.5 |
| JT03LA Spot 79  | 183  | 33174   | 2.3 | 19.6236 | 1.6 | 0.1296 | 1.9 | 0.0185 | 1.0 | 0.55 | 117.9 | 1.2 | 123.8 | 2.2 | 238.0 | 36.4 | 117.9 | 1.2 |
| JT03LA Spot 296 | 208  | 15663   | 2.1 | 20.9961 | 1.3 | 0.1212 | 1.8 | 0.0185 | 1.3 | 0.69 | 118.0 | 1.5 | 116.2 | 2.0 | 79.8  | 31.7 | 118.0 | 1.5 |
| JT03LA Spot 217 | 329  | 134167  | 3.4 | 20.4398 | 1.4 | 0.1246 | 2.4 | 0.0185 | 2.0 | 0.82 | 118.1 | 2.3 | 119.2 | 2.7 | 143.2 | 32.9 | 118.1 | 2.3 |
| JT03LA Spot 178 | 293  | 17667   | 3.5 | 20.7167 | 1.3 | 0.1230 | 2.0 | 0.0185 | 1.6 | 0.78 | 118.1 | 1.9 | 117.8 | 2.3 | 111.5 | 30.0 | 118.1 | 1.9 |
| JT03LA Spot 284 | 203  | 8620    | 1.6 | 21.2161 | 1.6 | 0.1203 | 2.3 | 0.0185 | 1.6 | 0.70 | 118.3 | 1.9 | 115.3 | 2.5 | 55.0  | 38.8 | 118.3 | 1.9 |
| JT03LA Spot 175 | 84   | 9498    | 2.1 | 20.6223 | 2.1 | 0.1239 | 2.4 | 0.0185 | 1.3 | 0.52 | 118.4 | 1.5 | 118.6 | 2.7 | 122.3 | 49.0 | 118.4 | 1.5 |
| JT03LA Spot 74  | 1003 | 98604   | 1.4 | 20.6740 | 1.1 | 0.1236 | 1.8 | 0.0185 | 1.4 | 0.80 | 118.4 | 1.7 | 118.3 | 2.0 | 116.4 | 25.4 | 118.4 | 1.7 |
| JT03LA Spot 146 | 207  | 6045    | 2.1 | 22.0353 | 1.5 | 0.1161 | 1.9 | 0.0186 | 1.2 | 0.60 | 118.5 | 1.4 | 111.5 | 2.0 | NA    | NA   | 118.5 | 1.4 |
| JT03LA Spot 107 | 602  | 675986  | 1.4 | 20.6801 | 1.0 | 0.1237 | 1.8 | 0.0186 | 1.5 | 0.84 | 118.6 | 1.8 | 118.4 | 2.0 | 115.7 | 23.6 | 118.6 | 1.8 |
| JT03LA Spot 201 | 592  | 131649  | 1.7 | 20.3329 | 1.2 | 0.1259 | 2.3 | 0.0186 | 2.0 | 0.86 | 118.6 | 2.4 | 120.4 | 2.7 | 155.5 | 28.0 | 118.6 | 2.4 |
| JT03LA Spot 44  | 264  | 9287    | 2.0 | 20.9077 | 1.6 | 0.1224 | 2.0 | 0.0186 | 1.3 | 0.62 | 118.6 | 1.5 | 117.2 | 2.2 | 89.8  | 37.6 | 118.6 | 1.5 |
| JT03LA Spot 85  | 210  | 17657   | 1.9 | 18.5151 | 1.8 | 0.1382 | 2.2 | 0.0186 | 1.4 | 0.62 | 118.6 | 1.6 | 131.5 | 2.8 | 370.5 | 39.5 | 118.6 | 1.6 |
| JT03LA Spot 244 | 181  | 73125   | 2.2 | 19.7085 | 1.6 | 0.1299 | 2.2 | 0.0186 | 1.6 | 0.70 | 118.6 | 1.9 | 124.0 | 2.6 | 228.0 | 36.6 | 118.6 | 1.9 |
| JT03LA Spot 139 | 100  | 4431    | 2.7 | 22.7884 | 4.2 | 0.1123 | 4.5 | 0.0186 | 1.6 | 0.35 | 118.6 | 1.9 | 108.1 | 4.6 | NA    | NA   | 118.6 | 1.9 |
| JT03LA Spot 215 | 186  | 46740   | 3.8 | 20.9139 | 2.1 | 0.1224 | 2.5 | 0.0186 | 1.4 | 0.54 | 118.7 | 1.6 | 117.3 | 2.8 | 89.1  | 50.0 | 118.7 | 1.6 |
| JT03LA Spot 289 | 125  | 3201    | 2.4 | 22.2575 | 2.1 | 0.1151 | 2.4 | 0.0186 | 1.3 | 0.52 | 118.7 | 1.5 | 110.6 | 2.5 | NA    | NA   | 118.7 | 1.5 |
| JT03LA Spot 16  | 118  | 4036    | 2.5 | 22.4952 | 4.5 | 0.1139 | 4.7 | 0.0186 | 1.5 | 0.32 | 118.7 | 1.8 | 109.5 | 4.9 | NA    | NA   | 118.7 | 1.8 |
| JT03LA Spot 262 | 229  | 170540  | 2.0 | 20.5011 | 1.6 | 0.1250 | 1.9 | 0.0186 | 1.1 | 0.57 | 118.7 | 1.3 | 119.6 | 2.2 | 136.1 | 36.9 | 118.7 | 1.3 |
| JT03LA Spot 198 | 113  | 70170   | 2.3 | 20.4354 | 1.9 | 0.1254 | 2.3 | 0.0186 | 1.2 | 0.52 | 118.7 | 1.4 | 119.9 | 2.6 | 143.7 | 45.7 | 118.7 | 1.4 |
| JT03LA Spot 246 | 91   | 7335    | 1.8 | 20.8501 | 3.1 | 0.1230 | 3.4 | 0.0186 | 1.5 | 0.44 | 118.8 | 1.8 | 117.8 | 3.8 | 96.3  | 72.7 | 118.8 | 1.8 |
| JT03LA Spot 252 | 202  | 8258    | 2.2 | 21.0645 | 1.8 | 0.1217 | 2.3 | 0.0186 | 1.5 | 0.65 | 118.8 | 1.8 | 116.6 | 2.6 | 72.1  | 42.1 | 118.8 | 1.8 |
| JT03LA Spot 41  | 118  | 1805393 | 2.5 | 19.9031 | 1.8 | 0.1289 | 2.2 | 0.0186 | 1.2 | 0.56 | 118.9 | 1.4 | 123.1 | 2.5 | 205.3 | 41.3 | 118.9 | 1.4 |
| JT03LA Spot 145 | 408  | 123599  | 3.1 | 21.0007 | 1.4 | 0.1222 | 2.2 | 0.0186 | 1.7 | 0.77 | 118.9 | 2.0 | 117.1 | 2.4 | 79.3  | 33.1 | 118.9 | 2.0 |
| JT03LA Spot 91  | 110  | 8211    | 3.1 | 21.2045 | 2.4 | 0.1210 | 2.8 | 0.0186 | 1.3 | 0.48 | 118.9 | 1.6 | 116.0 | 3.1 | 56.3  | 58.3 | 118.9 | 1.6 |
| JT03LA Spot 77  | 551  | 27237   | 2.2 | 20.4738 | 1.5 | 0.1255 | 2.5 | 0.0186 | 2.1 | 0.81 | 119.1 | 2.4 | 120.1 | 2.9 | 139.3 | 35.1 | 119.1 | 2.4 |
| JT03LA Spot 25  | 261  | 8440    | 2.0 | 21.2343 | 1.6 | 0.1211 | 2.2 | 0.0187 | 1.5 | 0.68 | 119.1 | 1.7 | 116.0 | 2.4 | 52.9  | 37.8 | 119.1 | 1.7 |
| JT03LA Spot 192 | 571  | 20072   | 1.8 | 21.0178 | 1.1 | 0.1224 | 2.1 | 0.0187 | 1.7 | 0.84 | 119.2 | 2.0 | 117.2 | 2.3 | 77.3  | 26.7 | 119.2 | 2.0 |
| JT03LA Spot 169 | 259  | 32216   | 2.4 | 21.1044 | 1.7 | 0.1219 | 2.4 | 0.0187 | 1.6 | 0.68 | 119.3 | 1.9 | 116.8 | 2.6 | 67.6  | 41.4 | 119.3 | 1.9 |
| JT03LA Spot 221 | 243  | 27659   | 1.5 | 20.0783 | 2.0 | 0.1282 | 2.5 | 0.0187 | 1.5 | 0.61 | 119.3 | 1.8 | 122.5 | 2.9 | 184.9 | 46.0 | 119.3 | 1.8 |
| JT03LA Spot 197 | 134  | 8083    | 2.2 | 20.9048 | 2.9 | 0.1233 | 3.1 | 0.0187 | 1.2 | 0.39 | 119.4 | 1.4 | 118.0 | 3.5 | 90.1  | 68.5 | 119.4 | 1.4 |
| JT03LA Spot 166 | 236  | 23430   | 1.8 | 20.4536 | 1.5 | 0.1261 | 2.1 | 0.0187 | 1.5 | 0.70 | 119.5 | 1.8 | 120.6 | 2.4 | 141.6 | 36.0 | 119.5 | 1.8 |
| JT03LA Spot 160 | 117  | 15028   | 2.4 | 19.8657 | 2.3 | 0.1298 | 2.7 | 0.0187 | 1.3 | 0.48 | 119.5 | 1.5 | 123.9 | 3.1 | 209.6 | 54.0 | 119.5 | 1.5 |
| JT03LA Spot 208 | 83   | 7559    | 2.1 | 20.4199 | 2.7 | 0.1263 | 3.0 | 0.0187 | 1.4 | 0.47 | 119.5 | 1.7 | 120.8 | 3.5 | 145.5 | 62.9 | 119.5 | 1.7 |
| JT03LA Spot 237 | 108  | 24251   | 3.3 | 19.6048 | 2.4 | 0.1317 | 2.7 | 0.0187 | 1.3 | 0.46 | 119.6 | 1.5 | 125.6 | 3.2 | 240.2 | 55.6 | 119.6 | 1.5 |
| JT03LA Spot 305 | 439  | 96546   | 1.5 | 20.4071 | 1.0 | 0.1265 | 2.0 | 0.0187 | 1.8 | 0.87 | 119.6 | 2.1 | 120.9 | 2.3 | 147.0 | 23.0 | 119.6 | 2.1 |
| JT03LA Spot 225 | 630  | 92262   | 2.1 | 20.4955 | 1.0 | 0.1260 | 2.0 | 0.0187 | 1.7 | 0.85 | 119.7 | 2.0 | 120.5 | 2.2 | 136.8 | 24.2 | 119.7 | 2.0 |
| JT03LA Spot 86  | 331  | 34429   | 2.9 | 20.9603 | 1.5 | 0.1234 | 1.9 | 0.0188 | 1.3 | 0.65 | 119.8 | 1.5 | 118.1 | 2.2 | 83.8  | 35.1 | 119.8 | 1.5 |
| JT03LA Spot 30  | 306  | 74602   | 1.8 | 20.6151 | 1.0 | 0.1256 | 1.9 | 0.0188 | 1.6 | 0.85 | 120.0 | 1.9 | 120.1 | 2.1 | 123.1 | 22.7 | 120.0 | 1.9 |
| JT03LA Spot 18  | 173  | 6739    | 2.1 | 21.6893 | 2.5 | 0.1194 | 2.9 | 0.0188 | 1.5 | 0.51 | 120.0 | 1.8 | 114.5 | 3.2 | 2.1   | 60.9 | 120.0 | 1.8 |
| JT03LA Spot 75  | 256  | 66681   | 2.4 | 20.3992 | 1.3 | 0.1270 | 2.1 | 0.0188 | 1.6 | 0.79 | 120.0 | 1.9 | 121.4 | 2.4 | 147.8 | 29.5 | 120.0 | 1.9 |
| JT03LA Spot 37  | 156  | 8917    | 1.5 | 21.6124 | 2.3 | 0.1199 | 2.6 | 0.0188 | 1.3 | 0.48 | 120.1 | 1.5 | 115.0 | 2.9 | 10.7  | 55.5 | 120.1 | 1.5 |
| JT03LA Spot 268 | 102  | 13522   | 2.2 | 21.0534 | 2.1 | 0.1233 | 2.4 | 0.0188 | 1.3 | 0.53 | 120.3 | 1.5 | 118.1 | 2.7 | 73.3  | 49.2 | 120.3 | 1.5 |
| JT03LA Spot 189 | 107  | 11117   | 2.4 | 19.8034 | 2.1 | 0.1313 | 2.5 | 0.0189 | 1.4 | 0.56 | 120.4 | 1.7 | 125.2 | 3.0 | 216.9 | 48.5 | 120.4 | 1.7 |
| JT03LA Spot 156 | 335  | 95329   | 2.9 | 20.9978 | 1.7 | 0.1239 | 2.2 | 0.0189 | 1.5 | 0.66 | 120.5 | 1.8 | 118.6 | 2.5 | 79.6  | 39.7 | 120.5 | 1.8 |
| JT03LA Spot 159 | 934  | 61387   | 2.1 | 20.5735 | 1.0 | 0.1264 | 1.9 | 0.0189 | 1.6 | 0.85 | 120.5 | 1.9 | 120.9 | 2.1 | 127.9 | 23.0 | 120.5 | 1.9 |
| JT03LA Spot 290 | 225  | 30182   | 1.8 | 19.9878 | 2.0 | 0.1302 | 2.6 | 0.0189 | 1.7 | 0.64 | 120.6 | 2.0 | 124.2 | 3.0 | 195.4 | 46.6 | 120.6 | 2.0 |
| JT03LA Spot 314 | 117  | 4512    | 1.8 | 22.2497 | 2.6 | 0.1173 | 3.2 | 0.0189 | 1.9 | 0.60 | 120.9 | 2.3 | 112.6 | 3.4 | NA    | NA   | 120.9 | 2.3 |
| JT03LA Spot 124 | 202  | 5438    | 2.5 | 22.0863 | 1.8 | 0.1182 | 2.3 | 0.0189 | 1.4 | 0.62 | 121.0 | 1.7 | 113.4 | 2.4 | NA    | NA   | 121.0 | 1.7 |
| JT03LA Spot 7   | 156  | 7676    | 2.5 | 21.4964 | 1.8 | 0.1214 | 2.3 | 0.0189 | 1.4 | 0.62 | 121.0 | 1.7 | 116.4 | 2.6 | 23.6  | 43.7 | 121.0 | 1.7 |
| JT03LA Spot 33  | 58   | 1888    | 2.5 | 24.3211 | 2.3 | 0.1074 | 2.6 | 0.0189 | 1.2 | 0.44 | 121.0 | 1.4 | 103.5 | 2.6 | NA    | NA   | 121.0 | 1.4 |
| JT03LA Spot 14  | 171  | 5637    | 2.0 | 21.5774 | 1.4 | 0.1210 | 2.1 | 0.0189 | 1.5 | 0.73 | 121.0 | 1.8 | 116.0 | 2.3 | 14.6  | 34.6 | 121.0 | 1.8 |
| JT03LA Spot 299 | 72   | 9826    | 2.9 | 20.9232 | 2.4 | 0.1249 | 2.8 | 0.0190 | 1.5 | 0.52 | 121.0 | 1.7 | 119.5 | 3.1 | 88.1  | 56.1 | 121.0 | 1.7 |
| JT03LA Spot 194 | 176  | 6073    | 3.1 | 21.2833 | 3.1 | 0.1230 | 3.4 | 0.0190 | 1.4 | 0.42 | 121.3 | 1.7 | 117.8 | 3.8 | 47.5  | 73.1 | 121.3 | 1.7 |
| JT03LA Spot 258 | 117  | 143970  | 2.4 | 19.9783 | 1.8 | 0.1311 | 2.5 | 0.0190 | 1.8 | 0.72 | 121.3 | 2.2 | 125.0 | 3.0 | 196.5 | 40.9 | 121.3 | 2.2 |
| JT03LA Spot 141 | 87   | 5488    | 2.9 | 21.1326 | 2.0 | 0.1240 | 2.6 | 0.0190 | 1.6 | 0.62 | 121.4 | 1.9 | 118.7 | 2.9 | 64.4  | 48.7 | 121.4 | 1.9 |
| JT03LA Spot 182 | 400  | 23013   | 2.4 | 20.5386 | 1.3 | 0.1276 | 2.1 | 0.0190 | 1.7 | 0.80 | 121.5 | 2.1 | 122.0 | 2.5 | 131.8 | 30.1 | 121.5 | 2.1 |
| JT03LA Spot 5   | 67   | 63256   | 3.1 | 21.0198 | 2.6 | 0.1247 | 3.3 | 0.0190 | 2.2 | 0.64 | 121.5 | 2.6 | 119.4 | 3.8 | 77.1  | 60.9 | 121.5 | 2.6 |
| JT03LA Spot 259 | 647  | 93125   | 1.9 | 20.4600 | 1.0 | 0.1282 | 1.7 | 0.0190 | 1.4 | 0.82 | 121.6 | 1.7 | 122.5 | 2.0 | 140.9 | 22.6 | 121.6 | 1.7 |
| JT03LA Spot 188 | 120  | 14981   | 3.4 | 21.2877 | 2.4 | 0.1233 | 2.9 | 0.0190 | 1.6 | 0.57 | 121.6 | 2.0 | 118.0 | 3.2 | 46.9  | 56.6 | 121.6 | 2.0 |
| JT03LA Spot 303 | 336  | 43208   | 1.9 | 20.4155 | 1.2 | 0.1286 | 2.6 | 0.0191 | 2.3 | 0.89 | 121.7 | 2.7 | 122.9 | 3.0 | 146.0 | 27.8 | 121.7 | 2.7 |
| JT03LA Spot 125 | 196  | 10942   | 1.9 | 21.3632 | 1.7 | 0.1230 | 2.2 | 0.0191 | 1.4 | 0.63 | 121.7 | 1.7 | 117.8 | 2.5 | 38.5  | 41.2 | 121.7 | 1.7 |
| JT03LA Spot 127 | 313  | 11874   | 2.5 | 18.4952 | 3.0 | 0.1422 | 3.7 | 0.0191 | 2.2 | 0.59 | 121.9 | 2.6 | 135.0 | 4.6 | 372.9 | 66.9 | 121.9 | 2.6 |
| JT03LA Spot 229 | 638  | 19959   | 1.4 | 19.1246 | 1.3 | 0.1378 | 2.0 | 0.0191 | 1.5 | 0.75 | 122.1 | 1.8 | 131.0 | 2.5 | 297.1 | 30.4 | 122.1 | 1.8 |
| JT03LA Spot 21  | 203  | 6378    | 2.0 | 21.8521 | 1.7 | 0.1206 | 2.1 | 0.0191 | 1.1 | 0.55 | 122.1 | 1.4 | 115.6 | 2.3 | NA    | NA   | 122.1 | 1.4 |
| JT03LA Spot 134 | 103  | 39530   | 2.2 | 20.1705 | 2.4 | 0.1307 | 3.0 | 0.0191 | 1.7 | 0.59 | 122.2 | 2.1 | 124.8 | 3.5 | 174.2 | 56.0 | 122.2 | 2.1 |
| JT03LA Spot 112 | 354  | 14994   | 1.6 | 21.0307 | 1.1 | 0.1254 | 1.8 | 0.0191 | 1.5 | 0.82 | 122.2 | 1.8 | 120.0 | 2.1 | 75.9  | 25.2 | 122.2 | 1.8 |
| JT03LA Spot 286 | 307  | 21277   | 2.4 | 20.9131 | 1.6 | 0.1262 | 2.4 | 0.019  |     |      |       |     |       |     |       |      |       |     |

|                 |      |        |      |         |      |        |      |        |       |      |       |     |       |      |        |       |       |     |
|-----------------|------|--------|------|---------|------|--------|------|--------|-------|------|-------|-----|-------|------|--------|-------|-------|-----|
| JT03LA Spot 150 | 153  | 77926  | 2.2  | 20.6386 | 2.1  | 0.1356 | 2.3  | 0.0203 | 1.0   | 0.43 | 129.6 | 1.3 | 129.2 | 2.8  | 120.4  | 50.0  | 129.6 | 1.3 |
| JT03LA Spot 136 | 270  | 348441 | 3.6  | 19.6343 | 1.3  | 0.1426 | 1.6  | 0.0203 | 0.9   | 0.54 | 129.7 | 1.1 | 135.4 | 2.0  | 236.7  | 30.4  | 129.7 | 1.1 |
| JT03LA Spot 223 | 291  | 32931  | 3.6  | 20.8638 | 1.3  | 0.1399 | 2.1  | 0.0212 | 1.6   | 0.77 | 135.1 | 2.2 | 132.9 | 2.6  | 94.8   | 31.7  | 135.1 | 2.2 |
| JT03LA Spot 113 | 105  | 11012  | 2.4  | 11.2459 | 8.7  | 0.2613 | 8.9  | 0.0213 | 1.8   | 0.20 | 136.0 | 2.4 | 235.7 | 18.7 | 1401.6 | 167.5 | 136.0 | 2.4 |
| JT03LA Spot 32  | 162  | 84825  | 2.6  | 19.9237 | 1.7  | 0.1486 | 2.1  | 0.0215 | 1.1   | 0.55 | 137.0 | 1.5 | 140.7 | 2.7  | 202.9  | 39.8  | 137.0 | 1.5 |
| JT03LA Spot 297 | 39   | 1586   | 3.4  | 6.6854  | 16.2 | 0.4429 | 16.3 | 0.0215 | 2.0   | 0.12 | 137.0 | 2.7 | 372.3 | 50.9 | 2340.4 | 279.3 | 137.0 | 2.7 |
| JT03LA Spot 294 | 210  | 7495   | 1.3  | 21.0497 | 1.3  | 0.1437 | 1.7  | 0.0219 | 1.1   | 0.65 | 139.9 | 1.5 | 136.3 | 2.1  | 73.7   | 29.9  | 139.9 | 1.5 |
| JT03LA Spot 129 | 568  | 13725  | 1.8  | 18.7773 | 1.3  | 0.1612 | 2.6  | 0.0220 | 2.2   | 0.87 | 140.1 | 3.1 | 151.8 | 3.6  | 338.7  | 28.9  | 140.1 | 3.1 |
| JT03LA Spot 143 | 412  | 26241  | 2.0  | 20.4112 | 1.6  | 0.1497 | 2.6  | 0.0222 | 2.0   | 0.78 | 141.3 | 2.8 | 141.6 | 3.4  | 146.5  | 37.5  | 141.3 | 2.8 |
| JT03LA Spot 71  | 115  | 6997   | 1.6  | 21.2705 | 1.8  | 0.1439 | 2.3  | 0.0222 | 1.5   | 0.64 | 141.6 | 2.0 | 136.5 | 2.9  | 48.8   | 42.2  | 141.6 | 2.0 |
| JT03LA Spot 164 | 270  | 29027  | 1.4  | 20.6732 | 1.6  | 0.1495 | 2.4  | 0.0224 | 1.7   | 0.73 | 143.0 | 2.4 | 141.5 | 3.1  | 116.5  | 38.4  | 143.0 | 2.4 |
| JT03LA Spot 203 | 352  | 33146  | 5.3  | 20.6168 | 1.2  | 0.1513 | 2.1  | 0.0226 | 1.7   | 0.82 | 144.3 | 2.4 | 143.1 | 2.8  | 122.9  | 28.6  | 144.3 | 2.4 |
| JT03LA Spot 280 | 372  | 62780  | 1.6  | 19.9907 | 1.4  | 0.1571 | 2.3  | 0.0228 | 1.8   | 0.78 | 145.3 | 2.6 | 148.2 | 3.2  | 195.1  | 33.6  | 145.3 | 2.6 |
| JT03LA Spot 228 | 311  | 33025  | 3.0  | 20.3157 | 1.7  | 0.1551 | 2.8  | 0.0229 | 2.2   | 0.80 | 145.7 | 3.2 | 146.4 | 3.8  | 157.4  | 38.7  | 145.7 | 3.2 |
| JT03LA Spot 114 | 44   | 2645   | 1.5  | 22.4727 | 2.8  | 0.1407 | 3.0  | 0.0229 | 1.2   | 0.40 | 146.2 | 1.7 | 133.7 | 3.8  | NA     | NA    | 146.2 | 1.7 |
| JT03LA Spot 42  | 175  | 15615  | 1.9  | 21.0363 | 1.5  | 0.1505 | 1.9  | 0.0230 | 1.2   | 0.61 | 146.5 | 1.7 | 142.4 | 2.5  | 75.2   | 35.7  | 146.5 | 1.7 |
| JT03LA Spot 56  | 609  | 44432  | 1.5  | 20.3890 | 0.9  | 0.1557 | 2.1  | 0.0230 | 1.9   | 0.90 | 146.8 | 2.8 | 146.9 | 2.9  | 149.0  | 21.9  | 146.8 | 2.8 |
| JT03LA Spot 11  | 342  | 15419  | 2.4  | 20.8505 | 1.5  | 0.1523 | 2.4  | 0.0230 | 1.8   | 0.77 | 146.9 | 2.6 | 144.0 | 3.2  | 96.3   | 36.0  | 146.9 | 2.6 |
| JT03LA Spot 97  | 115  | 16609  | 2.7  | 20.5504 | 1.7  | 0.1548 | 2.0  | 0.0231 | 1.0   | 0.52 | 147.2 | 1.5 | 146.2 | 2.7  | 130.5  | 39.6  | 147.2 | 1.5 |
| JT03LA Spot 263 | 347  | 30298  | 1.8  | 20.5908 | 1.6  | 0.1548 | 2.4  | 0.0231 | 1.9   | 0.77 | 147.4 | 2.7 | 146.1 | 3.3  | 125.9  | 36.6  | 147.4 | 2.7 |
| JT03LA Spot 19  | 180  | 8133   | 2.7  | 21.0673 | 1.4  | 0.1513 | 2.0  | 0.0231 | 1.4   | 0.72 | 147.4 | 2.1 | 143.1 | 2.7  | 71.8   | 33.3  | 147.4 | 2.1 |
| JT03LA Spot 53  | 1438 | 95022  | 4.9  | 20.1657 | 0.9  | 0.1581 | 1.7  | 0.0231 | 1.5   | 0.85 | 147.4 | 2.2 | 149.1 | 2.4  | 174.7  | 21.0  | 147.4 | 2.2 |
| JT03LA Spot 312 | 433  | 21346  | 2.2  | 20.4629 | 1.4  | 0.1558 | 2.1  | 0.0231 | 1.6   | 0.74 | 147.5 | 2.3 | 147.1 | 2.9  | 140.5  | 33.1  | 147.5 | 2.3 |
| JT03LA Spot 68  | 136  | 54902  | 1.7  | 20.0457 | 1.7  | 0.1592 | 2.3  | 0.0232 | 1.6   | 0.68 | 147.6 | 2.3 | 150.0 | 3.2  | 188.6  | 39.6  | 147.6 | 2.3 |
| JT03LA Spot 40  | 175  | 13980  | 1.8  | 21.0796 | 1.6  | 0.1516 | 2.0  | 0.0232 | 1.3   | 0.62 | 147.7 | 1.8 | 143.3 | 2.7  | 70.4   | 38.2  | 147.7 | 1.8 |
| JT03LA Spot 265 | 354  | 95906  | 2.3  | 20.0310 | 1.7  | 0.1595 | 2.5  | 0.0232 | 1.8   | 0.73 | 147.7 | 2.6 | 150.3 | 3.4  | 190.4  | 39.0  | 147.7 | 2.6 |
| JT03LA Spot 132 | 146  | 9711   | 1.6  | 20.1619 | 1.7  | 0.1585 | 2.0  | 0.0232 | 1.1   | 0.53 | 147.8 | 1.6 | 149.4 | 2.8  | 175.2  | 39.5  | 147.8 | 1.6 |
| JT03LA Spot 172 | 927  | 82742  | 2.8  | 20.3174 | 1.0  | 0.1574 | 1.7  | 0.0232 | 1.4   | 0.82 | 147.8 | 2.1 | 148.4 | 2.4  | 157.3  | 22.7  | 147.8 | 2.1 |
| JT03LA Spot 226 | 100  | 6372   | 2.0  | 21.4685 | 2.1  | 0.1490 | 2.4  | 0.0232 | 1.2   | 0.51 | 147.9 | 1.8 | 141.0 | 3.2  | 26.7   | 49.7  | 147.9 | 1.8 |
| JT03LA Spot 6   | 324  | 42792  | 2.7  | 20.5534 | 1.2  | 0.1567 | 1.9  | 0.0234 | 1.5   | 0.77 | 148.9 | 2.2 | 147.8 | 2.6  | 130.1  | 28.1  | 148.9 | 2.2 |
| JT03LA Spot 20  | 167  | 5846   | 2.1  | 19.5928 | 2.3  | 0.1645 | 2.7  | 0.0234 | 1.3   | 0.49 | 149.0 | 1.9 | 154.6 | 3.8  | 241.6  | 53.5  | 149.0 | 1.9 |
| JT03LA Spot 61  | 804  | 28328  | 2.3  | 20.2703 | 1.1  | 0.1591 | 2.2  | 0.0234 | 1.9   | 0.86 | 149.1 | 2.8 | 149.9 | 3.1  | 162.7  | 26.7  | 149.1 | 2.8 |
| JT03LA Spot 209 | 421  | 23532  | 6.4  | 21.0193 | 1.4  | 0.1537 | 2.5  | 0.0234 | 2.1   | 0.82 | 149.4 | 3.1 | 145.2 | 3.4  | 77.1   | 34.2  | 149.4 | 3.1 |
| JT03LA Spot 232 | 424  | 84676  | 4.5  | 19.8399 | 1.4  | 0.1631 | 2.2  | 0.0235 | 1.7   | 0.76 | 149.6 | 2.5 | 153.4 | 3.2  | 212.6  | 33.2  | 149.6 | 2.5 |
| JT03LA Spot 104 | 294  | 25218  | 1.7  | 20.4831 | 1.4  | 0.1580 | 2.1  | 0.0235 | 1.5   | 0.74 | 149.6 | 2.3 | 148.9 | 2.9  | 138.2  | 32.7  | 149.6 | 2.3 |
| JT03LA Spot 46  | 220  | 153303 | 2.6  | 20.0813 | 1.3  | 0.1617 | 2.0  | 0.0236 | 1.5   | 0.74 | 150.1 | 2.2 | 152.2 | 2.8  | 184.5  | 30.4  | 150.1 | 2.2 |
| JT03LA Spot 269 | 196  | 23289  | 1.7  | 19.6564 | 1.7  | 0.1653 | 2.2  | 0.0236 | 1.4   | 0.63 | 150.2 | 2.1 | 155.3 | 3.2  | 234.1  | 40.1  | 150.2 | 2.1 |
| JT03LA Spot 130 | 215  | 59056  | 2.8  | 19.8696 | 1.3  | 0.1635 | 1.7  | 0.0236 | 1.1   | 0.65 | 150.2 | 1.7 | 153.8 | 2.4  | 209.2  | 30.1  | 150.2 | 1.7 |
| JT03LA Spot 102 | 200  | 12300  | 1.6  | 20.7776 | 1.6  | 0.1564 | 1.8  | 0.0236 | 1.0   | 0.52 | 150.2 | 1.4 | 147.5 | 2.5  | 104.6  | 36.9  | 150.2 | 1.4 |
| JT03LA Spot 240 | 820  | 50625  | 17.4 | 20.4785 | 1.1  | 0.1587 | 2.0  | 0.0236 | 1.7   | 0.83 | 150.3 | 2.5 | 149.6 | 2.8  | 138.7  | 26.0  | 150.3 | 2.5 |
| JT03LA Spot 247 | 88   | 17395  | 2.7  | 20.1489 | 2.1  | 0.1614 | 2.7  | 0.0236 | 1.6   | 0.61 | 150.3 | 2.4 | 151.9 | 3.8  | 176.7  | 49.2  | 150.3 | 2.4 |
| JT03LA Spot 45  | 221  | 9325   | 2.8  | 20.9459 | 1.8  | 0.1553 | 2.1  | 0.0236 | 1.1   | 0.53 | 150.4 | 1.7 | 146.6 | 2.9  | 85.5   | 42.7  | 150.4 | 1.7 |
| JT03LA Spot 163 | 156  | 37358  | 1.5  | 20.3375 | 1.3  | 0.1602 | 1.7  | 0.0236 | 1.1   | 0.64 | 150.6 | 1.7 | 150.8 | 2.4  | 155.0  | 31.1  | 150.6 | 1.7 |
| JT03LA Spot 285 | 94   | 2587   | 1.9  | 22.2620 | 2.2  | 0.1463 | 2.5  | 0.0236 | 1.2   | 0.49 | 150.6 | 1.8 | 138.7 | 3.2  | NA     | NA    | 150.6 | 1.8 |
| JT03LA Spot 300 | 97   | 5588   | 3.3  | 20.6117 | 2.4  | 0.1583 | 2.8  | 0.0237 | 1.5   | 0.53 | 150.8 | 2.2 | 149.2 | 3.9  | 123.5  | 56.2  | 150.8 | 2.2 |
| JT03LA Spot 174 | 261  | 13513  | 2.4  | 20.4759 | 1.5  | 0.1596 | 1.9  | 0.0237 | 1.2   | 0.63 | 151.1 | 1.8 | 150.4 | 2.7  | 139.0  | 35.4  | 151.1 | 1.8 |
| JT03LA Spot 49  | 175  | 16109  | 2.6  | 20.5962 | 1.7  | 0.1590 | 2.0  | 0.0238 | 1.2   | 0.58 | 151.4 | 1.8 | 149.8 | 2.8  | 125.2  | 39.3  | 151.4 | 1.8 |
| JT03LA Spot 213 | 145  | 15411  | 2.5  | 21.4440 | 1.5  | 0.1533 | 1.9  | 0.0239 | 1.1   | 0.58 | 152.0 | 1.7 | 144.8 | 2.6  | 29.4   | 37.1  | 152.0 | 1.7 |
| JT03LA Spot 295 | 727  | 46383  | 1.9  | 20.2346 | 1.0  | 0.1625 | 1.8  | 0.0239 | 1.5   | 0.82 | 152.0 | 2.2 | 152.9 | 2.5  | 166.8  | 23.9  | 152.0 | 2.2 |
| JT03LA Spot 99  | 626  | 58946  | 2.6  | 20.5500 | 1.1  | 0.1601 | 2.3  | 0.0239 | 2.0   | 0.87 | 152.1 | 2.9 | 150.8 | 3.2  | 130.5  | 26.0  | 152.1 | 2.9 |
| JT03LA Spot 267 | 370  | 95615  | 5.9  | 20.0802 | 1.5  | 0.1639 | 2.6  | 0.0239 | 2.1   | 0.80 | 152.1 | 3.1 | 154.1 | 3.7  | 184.6  | 35.5  | 152.1 | 3.1 |
| JT03LA Spot 210 | 573  | 33598  | 2.3  | 20.6446 | 1.0  | 0.1596 | 1.6  | 0.0239 | 1.3   | 0.80 | 152.3 | 2.0 | 150.3 | 2.3  | 119.8  | 23.5  | 152.3 | 2.0 |
| JT03LA Spot 154 | 344  | 22672  | 2.2  | 20.3229 | 1.3  | 0.1623 | 1.9  | 0.0239 | 1.5   | 0.76 | 152.5 | 2.2 | 152.7 | 2.7  | 156.6  | 29.5  | 152.5 | 2.2 |
| JT03LA Spot 128 | 242  | 36715  | 2.9  | 20.3558 | 1.9  | 0.1621 | 2.5  | 0.0239 | 1.7   | 0.67 | 152.5 | 2.5 | 152.5 | 3.6  | 152.8  | 43.8  | 152.5 | 2.5 |
| JT03LA Spot 100 | 347  | 22278  | 1.3  | 20.4132 | 1.2  | 0.1617 | 1.7  | 0.0240 | 1.3   | 0.74 | 152.6 | 1.9 | 152.2 | 2.4  | 146.3  | 27.1  | 152.6 | 1.9 |
| JT03LA Spot 199 | 401  | 22441  | 2.8  | 20.0890 | 1.5  | 0.1643 | 2.5  | 0.0240 | 2.1   | 0.82 | 152.6 | 3.1 | 154.5 | 3.6  | 183.6  | 34.1  | 152.6 | 3.1 |
| JT03LA Spot 1   | 398  | 25318  | 2.7  | 20.2659 | 1.1  | 0.1629 | 1.9  | 0.0240 | 1.5   | 0.82 | 152.6 | 2.3 | 153.2 | 2.6  | 163.2  | 24.7  | 152.6 | 2.3 |
| JT03LA Spot 283 | 156  | 26403  | 1.7  | 20.4467 | 1.7  | 0.1618 | 2.2  | 0.0240 | 1.4   | 0.64 | 152.9 | 2.1 | 152.3 | 3.1  | 142.4  | 40.1  | 152.9 | 2.1 |
| JT03LA Spot 158 | 464  | 77310  | 2.8  | 20.4667 | 1.1  | 0.1616 | 1.6  | 0.0240 | 1.2   | 0.72 | 152.9 | 1.8 | 152.1 | 2.3  | 140.1  | 26.0  | 152.9 | 1.8 |
| JT03LA Spot 202 | 454  | 49293  | 2.8  | 20.0509 | 1.4  | 0.1651 | 2.0  | 0.0240 | 1.4   | 0.72 | 153.0 | 2.2 | 155.1 | 2.9  | 188.1  | 32.8  | 153.0 | 2.2 |
| JT03LA Spot 90  | 113  | 6051   | 3.7  | 21.8511 | 1.6  | 0.1515 | 2.2  | 0.0240 | 1.5   | 0.69 | 153.0 | 2.3 | 143.2 | 3.0  | NA     | NA    | 153.0 | 2.3 |
| JT03LA Spot 8   | 94   | 6758   | 4.6  | 20.9643 | 1.8  | 0.1580 | 2.2  | 0.0240 | 1.3   | 0.59 | 153.1 | 2.0 | 149.0 | 3.1  | 83.4   | 42.5  | 153.1 | 2.0 |
| JT03LA Spot 308 | 333  | 83162  | 1.5  | 19.7148 | 1.0  | 0.1683 | 1.7  | 0.0241 | 1.3   | 0.80 | 153.4 | 2.0 | 158.0 | 2.5  | 227.3  | 23.3  | 153.4 | 2.0 |
| JT03LA Spot 36  | 612  | 31930  | 2.7  | 19.9559 | 1.0  | 0.1665 | 1.8  | 0.0241 | 1.5   | 0.84 | 153.5 | 2.3 | 156.4 | 2.7  | 199.1  | 23.2  | 153.5 | 2.3 |
| JT03LA Spot 242 | 170  | 46022  | 2.8  | 20.1855 | 1.7  | 0.1649 | 2.4  | 0.0241 | 1.7   | 0.70 | 153.8 | 2.5 | 155.0 | 3.4  | 172.5  | 39.8  | 153.8 | 2.5 |
| JT03LA Spot 65  | 252  | 25387  | 2.6  | 20.4934 | 1.3  | 0.1627 | 1.7  | 0.0242 | 1.1   | 0.65 | 154.1 | 1.7 | 153.0 | 2.4  | 137.1  | 30.4  | 154.1 | 1.7 |
| JT03LA Spot 60  | 139  | 10313  | 1.7  | 21.1361 | 2.2  | 0.1577 | 2.5  | 0.0242 | 1.1   | 0.44 | 154.1 | 1.7 | 148.7 | 3.4  | 64.0   | 53.2  | 154.1 | 1.7 |
| JT03LA Spot 151 | 590  | 56774  | 2.9  | 20.4398 | 1.3  | 0.1635 | 2.2  | 0.0243 | 1.8</ |      |       |     |       |      |        |       |       |     |

|                 |      |         |     |         |     |        |     |        |     |      |       |     |       |      |        |       |       |     |
|-----------------|------|---------|-----|---------|-----|--------|-----|--------|-----|------|-------|-----|-------|------|--------|-------|-------|-----|
| JT03LA Spot 96  | 82   | 27064   | 2.1 | 20.4398 | 2.0 | 0.1663 | 2.3 | 0.0247 | 1.1 | 0.49 | 157.0 | 1.8 | 156.2 | 3.4  | 143.2  | 47.5  | 157.0 | 1.8 |
| JT03LA Spot 72  | 456  | 43941   | 1.5 | 20.3251 | 1.1 | 0.1672 | 1.8 | 0.0247 | 1.4 | 0.79 | 157.0 | 2.2 | 157.0 | 2.6  | 156.4  | 25.5  | 157.0 | 2.2 |
| JT03LA Spot 193 | 1844 | 194092  | 2.0 | 20.2296 | 0.8 | 0.1683 | 1.3 | 0.0247 | 1.1 | 0.82 | 157.3 | 1.7 | 157.9 | 1.9  | 167.4  | 17.6  | 157.3 | 1.7 |
| JT03LA Spot 282 | 520  | 42280   | 2.6 | 20.0933 | 1.2 | 0.1695 | 1.8 | 0.0247 | 1.3 | 0.74 | 157.4 | 2.1 | 159.0 | 2.6  | 183.1  | 28.3  | 157.4 | 2.1 |
| JT03LA Spot 3   | 331  | 51508   | 2.6 | 20.4977 | 1.0 | 0.1662 | 1.5 | 0.0247 | 1.1 | 0.74 | 157.5 | 1.8 | 156.2 | 2.2  | 136.5  | 24.5  | 157.5 | 1.8 |
| JT03LA Spot 24  | 461  | 84998   | 4.3 | 19.1678 | 1.4 | 0.1779 | 2.2 | 0.0247 | 1.7 | 0.76 | 157.5 | 2.6 | 166.2 | 3.3  | 291.9  | 32.0  | 157.5 | 2.6 |
| JT03LA Spot 115 | 148  | 2930    | 2.0 | 12.0677 | 6.8 | 0.2834 | 7.1 | 0.0248 | 1.9 | 0.27 | 158.0 | 2.9 | 253.4 | 15.8 | 1265.2 | 133.1 | 158.0 | 2.9 |
| JT03LA Spot 121 | 192  | 28337   | 2.5 | 20.0218 | 1.2 | 0.1710 | 1.7 | 0.0248 | 1.2 | 0.70 | 158.2 | 1.9 | 160.3 | 2.5  | 191.5  | 28.3  | 158.2 | 1.9 |
| JT03LA Spot 271 | 234  | 8609    | 2.1 | 19.4585 | 2.3 | 0.1761 | 3.1 | 0.0249 | 2.1 | 0.68 | 158.3 | 3.3 | 164.7 | 4.7  | 257.4  | 52.3  | 158.3 | 3.3 |
| JT03LA Spot 243 | 282  | 98265   | 3.3 | 19.9475 | 1.2 | 0.1724 | 2.0 | 0.0250 | 1.6 | 0.81 | 158.9 | 2.5 | 161.5 | 3.0  | 200.1  | 27.1  | 158.9 | 2.5 |
| JT03LA Spot 224 | 335  | 15697   | 2.0 | 19.9512 | 1.1 | 0.1726 | 2.1 | 0.0250 | 1.8 | 0.85 | 159.1 | 2.8 | 161.7 | 3.1  | 199.7  | 25.0  | 159.1 | 2.8 |
| JT03LA Spot 148 | 330  | 37567   | 3.4 | 20.1097 | 1.0 | 0.1715 | 1.8 | 0.0250 | 1.5 | 0.83 | 159.3 | 2.3 | 160.7 | 2.6  | 181.2  | 23.2  | 159.3 | 2.3 |
| JT03LA Spot 212 | 460  | 44688   | 2.3 | 20.5113 | 1.0 | 0.1684 | 1.8 | 0.0251 | 1.5 | 0.83 | 159.6 | 2.4 | 158.1 | 2.7  | 135.0  | 23.8  | 159.6 | 2.4 |
| JT03LA Spot 220 | 268  | 69870   | 2.4 | 19.7707 | 1.5 | 0.1752 | 2.1 | 0.0251 | 1.5 | 0.69 | 160.0 | 2.3 | 163.9 | 3.2  | 220.7  | 35.7  | 160.0 | 2.3 |
| JT03LA Spot 176 | 240  | 52032   | 3.2 | 20.5963 | 1.3 | 0.1682 | 1.6 | 0.0251 | 0.9 | 0.56 | 160.0 | 1.4 | 157.8 | 2.3  | 125.2  | 30.6  | 160.0 | 1.4 |
| JT03LA Spot 66  | 234  | 11111   | 2.6 | 20.7588 | 1.9 | 0.1669 | 2.4 | 0.0251 | 1.5 | 0.63 | 160.1 | 2.4 | 156.7 | 3.5  | 106.7  | 44.3  | 160.1 | 2.4 |
| JT03LA Spot 161 | 317  | 273540  | 3.0 | 20.3491 | 1.2 | 0.1704 | 2.0 | 0.0252 | 1.6 | 0.80 | 160.2 | 2.5 | 159.8 | 3.0  | 153.6  | 28.0  | 160.2 | 2.5 |
| JT03LA Spot 94  | 401  | 27996   | 2.4 | 20.7313 | 1.1 | 0.1679 | 1.8 | 0.0253 | 1.4 | 0.80 | 160.8 | 2.2 | 157.6 | 2.6  | 109.8  | 25.2  | 160.8 | 2.2 |
| JT03LA Spot 69  | 74   | 17252   | 2.7 | 20.8692 | 1.9 | 0.1678 | 2.2 | 0.0254 | 1.0 | 0.46 | 161.7 | 1.6 | 157.5 | 3.1  | 94.2   | 45.3  | 161.7 | 1.6 |
| JT03LA Spot 52  | 130  | 37953   | 3.0 | 20.7369 | 1.9 | 0.1689 | 2.6 | 0.0254 | 1.7 | 0.67 | 161.8 | 2.8 | 158.5 | 3.8  | 109.2  | 45.1  | 161.8 | 2.8 |
| JT03LA Spot 137 | 164  | 29506   | 1.5 | 20.3089 | 1.3 | 0.1734 | 2.0 | 0.0255 | 1.5 | 0.75 | 162.6 | 2.4 | 162.3 | 3.0  | 158.2  | 31.3  | 162.6 | 2.4 |
| JT03LA Spot 227 | 346  | 38610   | 3.1 | 19.9056 | 1.2 | 0.1799 | 1.9 | 0.0260 | 1.5 | 0.79 | 165.3 | 2.4 | 167.9 | 2.9  | 205.0  | 26.7  | 165.3 | 2.4 |
| JT03LA Spot 183 | 1319 | 1594706 | 1.7 | 19.5166 | 1.1 | 0.2549 | 2.4 | 0.0361 | 2.1 | 0.89 | 228.6 | 4.8 | 230.6 | 5.0  | 250.5  | 25.6  | 228.6 | 4.8 |
| JT03LA Spot 301 | 339  | 45246   | 2.3 | 19.8054 | 1.4 | 0.2534 | 2.4 | 0.0364 | 2.0 | 0.81 | 230.5 | 4.5 | 229.3 | 5.0  | 216.7  | 32.9  | 230.5 | 4.5 |
| JT03LA Spot 103 | 187  | 99496   | 2.6 | 18.9863 | 1.3 | 0.2967 | 1.7 | 0.0409 | 1.0 | 0.62 | 258.2 | 2.6 | 263.8 | 3.9  | 313.6  | 29.9  | 258.2 | 2.6 |
| JT03LA Spot 118 | 526  | 68290   | 2.9 | 19.1644 | 0.9 | 0.3337 | 1.9 | 0.0464 | 1.7 | 0.87 | 292.4 | 4.8 | 292.4 | 4.9  | 292.3  | 21.4  | 292.4 | 4.8 |
| JT03LA Spot 293 | 894  | 111037  | 3.1 | 18.4939 | 1.0 | 0.3488 | 1.7 | 0.0468 | 1.4 | 0.81 | 294.8 | 3.9 | 303.8 | 4.4  | 373.0  | 22.4  | 294.8 | 3.9 |
| JT03LA Spot 38  | 282  | 28163   | 2.3 | 19.1294 | 1.1 | 0.3404 | 1.6 | 0.0473 | 1.2 | 0.73 | 297.6 | 3.4 | 297.5 | 4.1  | 296.5  | 24.8  | 297.6 | 3.4 |
| JT03LA Spot 135 | 658  | 189955  | 2.8 | 19.0041 | 0.9 | 0.3445 | 1.8 | 0.0475 | 1.6 | 0.88 | 299.2 | 4.6 | 300.6 | 4.7  | 311.5  | 19.6  | 299.2 | 4.6 |
| JT03LA Spot 250 | 498  | 67221   | 2.7 | 18.4538 | 1.3 | 0.3566 | 2.5 | 0.0477 | 2.1 | 0.85 | 300.6 | 6.1 | 309.6 | 6.6  | 377.9  | 29.1  | 300.6 | 6.1 |
| JT03LA Spot 313 | 469  | 158515  | 5.1 | 19.2747 | 0.9 | 0.3434 | 2.0 | 0.0480 | 1.8 | 0.88 | 302.4 | 5.2 | 299.7 | 5.2  | 279.2  | 21.3  | 302.4 | 5.2 |
| JT03LA Spot 207 | 167  | 22363   | 2.6 | 19.1587 | 1.5 | 0.3468 | 1.9 | 0.0482 | 1.2 | 0.62 | 303.5 | 3.4 | 302.3 | 4.9  | 293.0  | 33.2  | 303.5 | 3.4 |
| JT03LA Spot 9   | 120  | 15277   | 1.9 | 15.7268 | 2.9 | 0.4236 | 3.1 | 0.0483 | 1.0 | 0.34 | 304.3 | 3.1 | 358.6 | 9.4  | 726.9  | 61.9  | 304.3 | 3.1 |
| JT03LA Spot 261 | 395  | 660987  | 1.7 | 18.7643 | 0.8 | 0.3555 | 1.6 | 0.0484 | 1.4 | 0.86 | 304.7 | 4.1 | 308.8 | 4.3  | 340.3  | 18.5  | 304.7 | 4.1 |
| JT03LA Spot 180 | 416  | 294336  | 2.2 | 18.9070 | 0.9 | 0.3528 | 1.9 | 0.0484 | 1.7 | 0.87 | 304.7 | 4.9 | 306.9 | 5.0  | 323.1  | 21.0  | 304.7 | 4.9 |
| JT03LA Spot 108 | 193  | 198118  | 1.8 | 19.2271 | 0.9 | 0.3476 | 1.6 | 0.0485 | 1.3 | 0.82 | 305.3 | 3.9 | 302.9 | 4.2  | 284.8  | 21.2  | 305.3 | 3.9 |
| JT03LA Spot 31  | 407  | 496210  | 1.4 | 19.0908 | 1.0 | 0.3503 | 1.7 | 0.0485 | 1.3 | 0.81 | 305.4 | 4.0 | 304.9 | 4.4  | 301.1  | 22.2  | 305.4 | 4.0 |
| JT03LA Spot 184 | 268  | 25354   | 1.7 | 18.8332 | 1.3 | 0.3558 | 1.9 | 0.0486 | 1.3 | 0.71 | 306.0 | 4.0 | 309.1 | 5.0  | 332.0  | 29.6  | 306.0 | 4.0 |
| JT03LA Spot 92  | 321  | 100936  | 2.7 | 19.1791 | 1.0 | 0.3501 | 1.8 | 0.0487 | 1.4 | 0.81 | 306.6 | 4.2 | 304.8 | 4.6  | 290.5  | 23.6  | 306.6 | 4.2 |
| JT03LA Spot 253 | 99   | 10498   | 2.0 | 19.1632 | 1.4 | 0.3504 | 1.9 | 0.0487 | 1.3 | 0.67 | 306.7 | 3.8 | 305.1 | 5.0  | 292.5  | 32.4  | 306.7 | 3.8 |
| JT03LA Spot 216 | 596  | 148905  | 1.6 | 18.9422 | 0.7 | 0.3548 | 1.7 | 0.0488 | 1.5 | 0.89 | 307.0 | 4.4 | 308.3 | 4.4  | 318.9  | 17.0  | 307.0 | 4.4 |
| JT03LA Spot 266 | 330  | 144188  | 1.7 | 18.9472 | 1.0 | 0.3551 | 1.8 | 0.0488 | 1.5 | 0.81 | 307.2 | 4.4 | 308.5 | 4.7  | 318.3  | 23.5  | 307.2 | 4.4 |
| JT03LA Spot 306 | 1252 | 318679  | 2.0 | 19.0657 | 0.7 | 0.3534 | 1.5 | 0.0489 | 1.3 | 0.87 | 307.7 | 4.0 | 307.3 | 4.0  | 304.1  | 17.0  | 307.7 | 4.0 |
| JT03LA Spot 95  | 990  | 79544   | 2.2 | 19.0735 | 0.8 | 0.3540 | 1.8 | 0.0490 | 1.7 | 0.90 | 308.3 | 5.0 | 307.7 | 4.8  | 303.2  | 17.8  | 308.3 | 5.0 |
| JT03LA Spot 67  | 351  | 122930  | 2.6 | 19.1114 | 1.0 | 0.3537 | 2.1 | 0.0490 | 1.8 | 0.86 | 308.6 | 5.3 | 307.5 | 5.4  | 298.6  | 23.8  | 308.6 | 5.3 |
| JT03LA Spot 82  | 1097 | 246264  | 1.6 | 19.0712 | 0.9 | 0.3546 | 1.7 | 0.0491 | 1.4 | 0.85 | 308.8 | 4.3 | 308.2 | 4.5  | 303.4  | 20.4  | 308.8 | 4.3 |
| JT03LA Spot 173 | 659  | 131455  | 1.5 | 18.8919 | 0.8 | 0.3583 | 1.7 | 0.0491 | 1.5 | 0.88 | 309.1 | 4.6 | 311.0 | 4.7  | 324.9  | 18.6  | 309.1 | 4.6 |
| JT03LA Spot 275 | 230  | 38296   | 5.7 | 18.9936 | 1.4 | 0.3571 | 1.8 | 0.0492 | 1.1 | 0.61 | 309.7 | 3.4 | 310.1 | 4.8  | 312.7  | 32.4  | 309.7 | 3.4 |
| JT03LA Spot 51  | 156  | 75615   | 1.8 | 18.9071 | 0.8 | 0.3595 | 1.6 | 0.0493 | 1.4 | 0.86 | 310.4 | 4.2 | 311.9 | 4.3  | 323.1  | 18.9  | 310.4 | 4.2 |
| JT03LA Spot 260 | 140  | 4834    | 3.5 | 12.4698 | 6.8 | 0.5475 | 7.2 | 0.0495 | 2.3 | 0.32 | 311.7 | 6.9 | 443.4 | 25.8 | 1200.9 | 134.5 | 311.7 | 6.9 |
| JT03LA Spot 302 | 490  | 97247   | 2.1 | 19.1672 | 0.9 | 0.3573 | 1.6 | 0.0497 | 1.3 | 0.83 | 312.6 | 4.0 | 310.2 | 4.2  | 292.0  | 19.9  | 312.6 | 4.0 |
| JT03LA Spot 70  | 379  | 81491   | 2.6 | 18.9307 | 0.7 | 0.3629 | 1.5 | 0.0498 | 1.3 | 0.89 | 313.6 | 4.1 | 314.4 | 4.0  | 320.3  | 15.5  | 313.6 | 4.1 |
| JT03LA Spot 195 | 210  | 24980   | 2.1 | 14.9859 | 1.8 | 0.4712 | 2.1 | 0.0512 | 1.1 | 0.52 | 322.1 | 3.5 | 392.0 | 6.9  | 828.4  | 37.8  | 322.1 | 3.5 |
| JT03LA Spot 89  | 323  | 170668  | 2.7 | 18.7107 | 0.9 | 0.4201 | 2.0 | 0.0570 | 1.7 | 0.89 | 357.6 | 6.0 | 356.1 | 5.9  | 346.8  | 20.6  | 357.6 | 6.0 |
| JT03LA Spot 157 | 648  | 95253   | 1.7 | 17.6290 | 0.8 | 0.5178 | 1.6 | 0.0662 | 1.4 | 0.86 | 413.4 | 5.6 | 423.7 | 5.6  | 479.9  | 18.6  | 413.4 | 5.6 |
| JT03LA Spot 245 | 1224 | 73510   | 2.0 | 17.7419 | 1.1 | 0.5233 | 2.1 | 0.0674 | 1.8 | 0.84 | 420.3 | 7.2 | 427.4 | 7.4  | 465.8  | 25.4  | 420.3 | 7.2 |
| JT03LA Spot 55  | 215  | 94988   | 1.5 | 18.0297 | 0.9 | 0.5173 | 1.4 | 0.0677 | 1.0 | 0.75 | 422.1 | 4.2 | 423.4 | 4.7  | 430.0  | 20.2  | 422.1 | 4.2 |
| JT03LA Spot 200 | 1156 | 108401  | 1.6 | 17.1742 | 0.7 | 0.5439 | 1.7 | 0.0678 | 1.5 | 0.90 | 422.7 | 6.3 | 441.0 | 6.1  | 537.3  | 16.2  | 422.7 | 6.3 |
| JT03LA Spot 181 | 335  | 105370  | 3.2 | 17.8725 | 1.1 | 0.5241 | 2.3 | 0.0680 | 2.1 | 0.89 | 423.9 | 8.5 | 427.9 | 8.2  | 449.5  | 24.2  | 423.9 | 8.5 |
| JT03LA Spot 57  | 131  | 200520  | 4.0 | 17.9449 | 1.3 | 0.5230 | 2.1 | 0.0681 | 1.6 | 0.77 | 424.7 | 6.5 | 427.2 | 7.2  | 440.5  | 29.4  | 424.7 | 6.5 |
| JT03LA Spot 133 | 256  | 32257   | 1.9 | 17.9129 | 1.0 | 0.5260 | 1.7 | 0.0684 | 1.4 | 0.80 | 426.3 | 5.7 | 429.1 | 6.0  | 444.5  | 22.9  | 426.3 | 5.7 |
| JT03LA Spot 167 | 336  | 94749   | 4.0 | 18.0082 | 1.1 | 0.5255 | 2.5 | 0.0687 | 2.2 | 0.89 | 428.1 | 9.0 | 428.8 | 8.6  | 432.7  | 25.4  | 428.1 | 9.0 |
| JT03LA Spot 144 | 194  | 23505   | 1.6 | 17.6502 | 1.3 | 0.5435 | 2.2 | 0.0696 | 1.8 | 0.82 | 433.7 | 7.6 | 440.7 | 7.9  | 477.2  | 27.6  | 433.7 | 7.6 |
| JT03LA Spot 101 | 667  | 90863   | 1.2 | 17.5728 | 1.0 | 0.5474 | 2.3 | 0.0698 | 2.0 | 0.89 | 434.9 | 8.4 | 443.3 | 8.1  | 486.9  | 23.0  | 434.9 | 8.4 |
| JT03LA Spot 26  | 229  | 93283   | 1.9 | 18.1595 | 0.7 | 0.5319 | 1.4 | 0.0701 | 1.2 | 0.86 | 436.7 | 5.1 | 433.1 | 4.9  | 414.0  | 15.8  | 436.7 | 5.1 |
| JT03LA Spot 168 | 68   | 42384   | 2.2 | 17.4121 | 1.4 | 0.5557 | 2.0 | 0.0702 | 1.4 | 0.72 | 437.4 | 6.1 | 448.7 | 7.3  | 507.2  | 30.5  | 437.4 | 6.1 |
| JT03LA Spot 291 | 245  | 23560   | 3.6 | 18.2068 | 1.1 | 0.5315 | 1.7 | 0.0702 | 1.3 | 0.77 | 437.5 | 5.6 | 432.8 | 6.1  | 408.2  | 24.8  | 437.5 | 5.6 |
| JT03LA Spot 64  | 469  | 39      |     |         |     |        |     |        |     |      |       |     |       |      |        |       |       |     |

|                 |     |         |      |         |     |         |     |        |     |      |        |      |        |      |        |      |        |      |
|-----------------|-----|---------|------|---------|-----|---------|-----|--------|-----|------|--------|------|--------|------|--------|------|--------|------|
| JT03LA Spot 73  | 49  | 34623   | 2.7  | 17.0741 | 1.5 | 0.7324  | 2.2 | 0.0907 | 1.6 | 0.73 | 559.9  | 8.5  | 558.0  | 9.3  | 550.1  | 32.5 | 559.9  | 8.5  |
| JT03LA Spot 191 | 229 | 467034  | 5.7  | 16.7765 | 0.9 | 0.7504  | 1.8 | 0.0913 | 1.5 | 0.87 | 563.5  | 8.3  | 568.5  | 7.7  | 588.4  | 18.9 | 563.5  | 8.3  |
| JT03LA Spot 205 | 18  | 2477    | 3.0  | 19.3913 | 2.3 | 0.6539  | 2.8 | 0.0920 | 1.5 | 0.56 | 567.4  | 8.3  | 510.9  | 11.1 | 265.4  | 52.5 | 567.4  | 8.3  |
| JT03LA Spot 190 | 341 | 76155   | 1.9  | 16.2928 | 1.1 | 0.8466  | 2.4 | 0.1001 | 2.1 | 0.88 | 614.9  | 12.2 | 622.8  | 11.0 | 651.5  | 23.9 | 614.9  | 12.2 |
| JT03LA Spot 50  | 173 | 832506  | 31.0 | 15.9583 | 1.2 | 0.9975  | 1.8 | 0.1155 | 1.4 | 0.76 | 704.6  | 9.1  | 702.6  | 9.1  | 695.9  | 24.6 | 704.6  | 9.1  |
| JT03LA Spot 233 | 198 | 35966   | 1.9  | 14.9892 | 0.8 | 1.2717  | 1.6 | 0.1383 | 1.3 | 0.85 | 835.1  | 10.4 | 833.1  | 8.9  | 828.0  | 17.3 | 835.1  | 10.4 |
| JT03LA Spot 279 | 89  | 61926   | 2.5  | 14.2521 | 1.2 | 1.4553  | 2.2 | 0.1505 | 1.8 | 0.84 | 903.7  | 15.4 | 912.1  | 13.1 | 932.3  | 24.2 | 932.3  | 24.2 |
| JT03LA Spot 292 | 178 | 182398  | 3.0  | 14.0518 | 1.0 | 1.5072  | 1.9 | 0.1537 | 1.6 | 0.84 | 921.5  | 13.5 | 933.3  | 11.4 | 961.3  | 20.5 | 961.3  | 20.5 |
| JT03LA Spot 211 | 277 | 149618  | 27.5 | 13.4957 | 1.3 | 1.5015  | 1.7 | 0.1470 | 1.1 | 0.66 | 884.3  | 9.3  | 931.0  | 10.3 | 1043.3 | 25.4 | 1043.3 | 25.4 |
| JT03LA Spot 204 | 403 | 298035  | 1.7  | 13.1886 | 0.7 | 1.9072  | 1.7 | 0.1825 | 1.6 | 0.91 | 1080.7 | 15.5 | 1083.6 | 11.3 | 1089.5 | 13.8 | 1089.5 | 13.8 |
| JT03LA Spot 59  | 207 | 296189  | 3.3  | 12.1610 | 1.2 | 2.4933  | 1.7 | 0.2200 | 1.3 | 0.74 | 1281.9 | 14.7 | 1270.1 | 12.4 | 1250.1 | 22.7 | 1250.1 | 22.7 |
| JT03LA Spot 15  | 89  | 150930  | 3.2  | 11.4629 | 0.8 | 2.7051  | 1.4 | 0.2250 | 1.1 | 0.80 | 1308.2 | 13.0 | 1329.9 | 10.2 | 1364.9 | 16.1 | 1364.9 | 16.1 |
| JT03LA Spot 76  | 447 | 167927  | 2.3  | 11.3376 | 1.1 | 3.0164  | 2.1 | 0.2481 | 1.8 | 0.85 | 1428.9 | 23.3 | 1411.8 | 16.3 | 1386.0 | 21.5 | 1386.0 | 21.5 |
| JT03LA Spot 277 | 746 | 1384268 | 2.2  | 9.6256  | 0.9 | 3.5841  | 1.8 | 0.2503 | 1.5 | 0.87 | 1440.1 | 19.9 | 1546.0 | 14.1 | 1693.9 | 15.9 | 1693.9 | 15.9 |
| JT03LA Spot 155 | 227 | 212646  | 1.5  | 9.4604  | 1.0 | 4.5639  | 1.6 | 0.3133 | 1.3 | 0.81 | 1756.8 | 20.2 | 1742.7 | 13.6 | 1725.8 | 17.7 | 1725.8 | 17.7 |
| JT03LA Spot 256 | 372 | 2972842 | 1.2  | 9.4028  | 0.9 | 4.4993  | 2.2 | 0.3070 | 2.0 | 0.91 | 1725.7 | 30.6 | 1730.8 | 18.4 | 1737.0 | 16.7 | 1737.0 | 16.7 |
| JT03LA Spot 281 | 125 | 129637  | 2.2  | 9.3968  | 0.8 | 4.5887  | 1.5 | 0.3129 | 1.3 | 0.84 | 1754.8 | 19.9 | 1747.2 | 12.9 | 1738.1 | 15.5 | 1738.1 | 15.5 |
| JT03LA Spot 310 | 119 | 167233  | 2.3  | 9.3244  | 0.8 | 4.4500  | 1.3 | 0.3011 | 1.0 | 0.75 | 1696.6 | 14.2 | 1721.7 | 10.6 | 1752.3 | 15.6 | 1752.3 | 15.6 |
| JT03LA Spot 12  | 215 | 216349  | 3.5  | 8.7004  | 0.8 | 5.4403  | 1.3 | 0.3434 | 1.1 | 0.80 | 1903.2 | 17.6 | 1891.2 | 11.4 | 1878.1 | 14.2 | 1878.1 | 14.2 |
| JT03LA Spot 276 | 40  | 16551   | 1.6  | 8.6248  | 1.0 | 5.6849  | 1.6 | 0.3558 | 1.2 | 0.76 | 1962.1 | 20.6 | 1929.1 | 13.8 | 1893.8 | 18.7 | 1893.8 | 18.7 |
| JT03LA Spot 47  | 149 | 159713  | 2.8  | 8.6110  | 1.2 | 5.4661  | 1.9 | 0.3415 | 1.5 | 0.78 | 1894.0 | 23.8 | 1895.3 | 16.0 | 1896.7 | 21.2 | 1896.7 | 21.2 |
| JT03LA Spot 13  | 261 | 357003  | 6.3  | 8.6006  | 0.8 | 5.5640  | 1.2 | 0.3472 | 0.9 | 0.73 | 1921.3 | 14.9 | 1910.6 | 10.5 | 1898.9 | 15.0 | 1898.9 | 15.0 |
| JT03LA Spot 58  | 356 | 197928  | 4.8  | 8.2131  | 0.9 | 6.3794  | 1.7 | 0.3802 | 1.4 | 0.85 | 2077.1 | 25.7 | 2029.4 | 14.9 | 1981.3 | 15.9 | 1981.3 | 15.9 |
| JT03LA Spot 111 | 184 | 2236295 | 1.7  | 8.1058  | 0.7 | 6.3898  | 1.3 | 0.3758 | 1.0 | 0.82 | 2056.7 | 18.5 | 2030.9 | 11.3 | 2004.7 | 13.1 | 2004.7 | 13.1 |
| JT03LA Spot 214 | 89  | 440566  | 1.2  | 7.8475  | 1.0 | 6.6210  | 1.6 | 0.3770 | 1.2 | 0.76 | 2062.2 | 21.7 | 2062.1 | 14.2 | 2062.0 | 18.4 | 2062.0 | 18.4 |
| JT03LA Spot 120 | 551 | 129848  | 1.3  | 5.9412  | 1.0 | 9.1782  | 1.9 | 0.3957 | 1.7 | 0.86 | 2149.0 | 30.4 | 2355.9 | 17.6 | 2540.2 | 16.2 | 2540.2 | 16.2 |
| JT03LA Spot 311 | 50  | 97685   | 1.2  | 5.0350  | 0.9 | 14.3216 | 1.8 | 0.5232 | 1.5 | 0.86 | 2712.8 | 33.5 | 2771.2 | 16.6 | 2814.1 | 14.4 | 2814.1 | 14.4 |
| JT03LA Spot 138 | 41  | 115068  | 2.0  | 4.8838  | 1.2 | 16.1490 | 1.7 | 0.5723 | 1.2 | 0.73 | 2917.1 | 29.1 | 2885.7 | 16.3 | 2863.8 | 19.0 | 2863.8 | 19.0 |

# CHISANA Spot River (modern river sand)

|                  |      |       |     |         |        |         |        |        |      |      |       |      |         |        |         |        |       |      |
|------------------|------|-------|-----|---------|--------|---------|--------|--------|------|------|-------|------|---------|--------|---------|--------|-------|------|
| CHISANA Spot 66  | 196  | 250   | 2.2 | 8.6705  | 86.4   | 0.0117  | 100.1  | 0.0007 | 50.4 | 0.50 | 4.7   | 2.4  | 11.8    | 11.7   | 1885.1  | 334.6  | 4.7   | 2.4  |
| CHISANA Spot 48  | 201  | 334   | 1.7 | 3.0048  | 180.7  | 0.0367  | 191.8  | 0.0008 | 64.4 | 0.34 | 5.1   | 3.3  | 36.6    | 69.0   | 3630.0  | 967.4  | 5.1   | 3.3  |
| CHISANA Spot 21  | 209  | 609   | 1.3 | -4.0535 | 221.3  | -0.0298 | 232.5  | 0.0009 | 71.4 | 0.31 | 5.7   | 4.0  | -30.8   | -72.8  | NA      | NA     | 5.7   | 4.0  |
| CHISANA Spot 36  | 201  | 554   | 2.4 | 1.2696  | 377.7  | 0.0959  | 380.0  | 0.0009 | 42.3 | 0.11 | 5.7   | 2.4  | 93.0    | 350.9  | NA      | NA     | 5.7   | 2.4  |
| CHISANA Spot 94  | 239  | 568   | 2.2 | 2.1201  | 434.4  | 0.0578  | 439.0  | 0.0009 | 63.3 | 0.14 | 5.7   | 3.6  | 57.0    | 248.2  | 4155.1  | 694.1  | 5.7   | 3.6  |
| CHISANA Spot 39  | 223  | 951   | 2.2 | 2.4471  | 218.7  | 0.0536  | 221.5  | 0.0010 | 35.3 | 0.16 | 6.1   | 2.2  | 53.0    | 114.9  | 3941.2  | 1036.9 | 6.1   | 2.2  |
| CHISANA Spot 75  | 168  | 342   | 2.2 | 2.1267  | 285.9  | 0.0636  | 289.6  | 0.0010 | 46.1 | 0.16 | 6.3   | 2.9  | 62.6    | 177.5  | 4150.4  | 991.7  | 6.3   | 2.9  |
| CHISANA Spot 55  | 181  | 292   | 1.5 | -0.1097 | 4437.5 | -1.2456 | 4438.0 | 0.0010 | 64.7 | 0.01 | 6.4   | 4.1  | #NUM!   | #NUM!  | NA      | NA     | 6.4   | 4.1  |
| CHISANA Spot 15  | 152  | 467   | 2.1 | 2.8209  | 146.9  | 0.0489  | 159.0  | 0.0010 | 60.8 | 0.38 | 6.4   | 3.9  | 48.5    | 75.4   | 3726.5  | 1135.4 | 6.4   | 3.9  |
| CHISANA Spot 103 | 206  | 897   | 2.2 | -1.0349 | 721.7  | -0.1347 | 724.0  | 0.0010 | 56.9 | 0.08 | 6.5   | 3.7  | -146.9  | #NUM!  | NA      | NA     | 6.5   | 3.7  |
| CHISANA Spot 99  | 231  | 477   | 2.1 | -0.6184 | 1085.6 | -0.2259 | 1086.5 | 0.0010 | 45.9 | 0.04 | 6.5   | 3.0  | -260.0  | #NUM!  | NA      | NA     | 6.5   | 3.0  |
| CHISANA Spot 83  | 156  | 436   | 2.4 | -1.0611 | 268.1  | -0.1339 | 272.4  | 0.0010 | 48.5 | 0.18 | 6.6   | 3.2  | -146.0  | -456.0 | NA      | NA     | 6.6   | 3.2  |
| CHISANA Spot 80  | 239  | 472   | 2.8 | -0.9249 | 637.5  | -0.1544 | 638.9  | 0.0010 | 42.1 | 0.07 | 6.7   | 2.8  | -170.3  | #NUM!  | NA      | NA     | 6.7   | 2.8  |
| CHISANA Spot 06  | 128  | 385   | 3.1 | -1.3534 | 206.2  | -0.1058 | 219.7  | 0.0010 | 75.7 | 0.34 | 6.7   | 5.1  | -113.5  | -270.0 | NA      | NA     | 6.7   | 5.1  |
| CHISANA Spot 77  | 826  | 1902  | 0.6 | 23.3378 | 74.6   | 0.0062  | 75.3   | 0.0011 | 9.8  | 0.13 | 6.8   | 0.7  | 6.3     | 4.7    | -176.4  | 2185.4 | 6.8   | 0.7  |
| CHISANA Spot 37  | 372  | 494   | 1.2 | 7.4431  | 132.8  | 0.0197  | 143.9  | 0.0011 | 55.3 | 0.38 | 6.8   | 3.8  | 19.8    | 28.2   | 2155.6  | 259.2  | 6.8   | 3.8  |
| CHISANA Spot 20  | 183  | 399   | 1.3 | -0.2255 | 1604.4 | -0.6500 | 1605.8 | 0.0011 | 65.0 | 0.04 | 6.9   | 4.4  | -1066.1 | #NUM!  | NA      | NA     | 6.9   | 4.4  |
| CHISANA Spot 12  | 201  | 460   | 2.6 | -1.6033 | 493.5  | -0.0916 | 495.1  | 0.0011 | 39.7 | 0.08 | 6.9   | 2.7  | -97.6   | -556.9 | NA      | NA     | 6.9   | 2.7  |
| CHISANA Spot 26  | 148  | 345   | 0.6 | -0.1074 | 3788.5 | -1.3741 | 3788.7 | 0.0011 | 40.1 | 0.01 | 6.9   | 2.8  | #NUM!   | #NUM!  | NA      | NA     | 6.9   | 2.8  |
| CHISANA Spot 27  | 163  | 343   | 2.6 | -0.9408 | 548.5  | -0.1595 | 550.4  | 0.0011 | 45.9 | 0.08 | 7.0   | 3.2  | -176.4  | #NUM!  | NA      | NA     | 7.0   | 3.2  |
| CHISANA Spot 07  | 127  | 566   | 1.4 | 1.3141  | 200.1  | 0.1149  | 205.9  | 0.0011 | 48.5 | 0.24 | 7.1   | 3.4  | 110.5   | 218.9  | NA      | NA     | 7.1   | 3.4  |
| CHISANA Spot 59  | 208  | 498   | 1.9 | 3.4441  | 145.2  | 0.0441  | 157.9  | 0.0011 | 62.1 | 0.39 | 7.1   | 4.4  | 43.8    | 67.8   | 3419.5  | 966.1  | 7.1   | 4.4  |
| CHISANA Spot 16  | 1226 | 1773  | 0.6 | 25.8714 | 31.2   | 0.0059  | 32.5   | 0.0011 | 9.0  | 0.28 | 7.1   | 0.6  | 6.0     | 1.9    | -440.2  | 837.2  | 7.1   | 0.6  |
| CHISANA Spot 38  | 239  | 788   | 2.5 | 0.5728  | 1169.0 | 0.2691  | 1169.7 | 0.0011 | 41.4 | 0.04 | 7.2   | 3.0  | 242.0   | #NUM!  | NA      | NA     | 7.2   | 3.0  |
| CHISANA Spot 69  | 176  | 515   | 1.8 | 4.8307  | 198.2  | 0.0320  | 201.7  | 0.0011 | 37.5 | 0.19 | 7.2   | 2.7  | 32.0    | 63.6   | 2882.3  | 455.7  | 7.2   | 2.7  |
| CHISANA Spot 89  | 135  | 331   | 2.5 | 4.0644  | 150.8  | 0.0385  | 156.6  | 0.0011 | 42.4 | 0.27 | 7.3   | 3.1  | 38.4    | 59.0   | 3159.5  | 794.3  | 7.3   | 3.1  |
| CHISANA Spot 70  | 214  | 498   | 2.5 | 3.4000  | 326.5  | 0.0469  | 329.4  | 0.0012 | 43.7 | 0.13 | 7.4   | 3.3  | 46.5    | 150.9  | 3439.5  | 448.7  | 7.4   | 3.3  |
| CHISANA Spot 58  | 179  | 341   | 2.1 | -1.2238 | 876.5  | -0.1315 | 877.6  | 0.0012 | 42.3 | 0.05 | 7.5   | 3.2  | -143.2  | #NUM!  | NA      | NA     | 7.5   | 3.2  |
| CHISANA Spot 22  | 190  | 686   | 2.1 | -3.8541 | 147.7  | -0.0419 | 154.2  | 0.0012 | 44.2 | 0.29 | 7.6   | 3.3  | -43.5   | -68.6  | NA      | NA     | 7.6   | 3.3  |
| CHISANA Spot 79  | 137  | 463   | 2.0 | 1.0910  | 495.2  | 0.1521  | 497.0  | 0.0012 | 42.7 | 0.09 | 7.8   | 3.3  | 143.8   | 798.4  | NA      | NA     | 7.8   | 3.3  |
| CHISANA Spot 18  | 271  | 823   | 2.7 | 0.4017  | 4010.7 | 0.4221  | 4010.8 | 0.0012 | 29.0 | 0.01 | 7.9   | 2.3  | 357.6   | #NUM!  | NA      | NA     | 7.9   | 2.3  |
| CHISANA Spot 68  | 172  | 529   | 2.1 | 8.1620  | 102.8  | 0.0211  | 107.5  | 0.0012 | 31.2 | 0.29 | 8.0   | 2.5  | 21.2    | 22.5   | 1993.2  | 309.1  | 8.0   | 2.5  |
| CHISANA Spot 67  | 213  | 512   | 1.9 | -1.2843 | 555.2  | -0.1347 | 556.9  | 0.0013 | 44.0 | 0.08 | 8.1   | 3.6  | -146.9  | #####  | NA      | NA     | 8.1   | 3.6  |
| CHISANA Spot 63  | 214  | 552   | 1.8 | 4.4582  | 147.1  | 0.0422  | 152.8  | 0.0014 | 41.4 | 0.27 | 8.8   | 3.6  | 42.0    | 62.9   | 3011.8  | 720.9  | 8.8   | 3.6  |
| CHISANA Spot 97  | 244  | 681   | 2.0 | 11.7144 | 137.9  | 0.0165  | 140.5  | 0.0014 | 26.9 | 0.19 | 9.1   | 2.4  | 16.7    | 23.2   | 1323.8  | 320.0  | 9.1   | 2.4  |
| CHISANA Spot 03  | 384  | 1046  | 2.3 | 6.4760  | 201.8  | 0.0308  | 204.2  | 0.0014 | 31.2 | 0.15 | 9.3   | 2.9  | 30.8    | 61.9   | 2395.4  | 124.1  | 9.3   | 2.9  |
| CHISANA Spot 33  | 207  | 544   | 2.1 | 43.2451 | 87.6   | 0.0091  | 89.2   | 0.0028 | 16.5 | 0.18 | 18.3  | 3.0  | 9.2     | 8.1    | -2044.3 | 1358.9 | 18.3  | 3.0  |
| CHISANA Spot 30  | 327  | 3591  | 2.4 | 22.2436 | 53.6   | 0.0198  | 55.4   | 0.0032 | 13.8 | 0.25 | 20.5  | 2.8  | 19.9    | 10.9   | -58.0   | 1400.9 | 20.5  | 2.8  |
| CHISANA Spot 82  | 240  | 3384  | 2.0 | 20.6427 | 87.2   | 0.0259  | 88.8   | 0.0039 | 16.8 | 0.19 | 24.9  | 4.2  | 25.9    | 22.7   | 120.9   | 2734.5 | 24.9  | 4.2  |
| CHISANA Spot 05  | 383  | 12167 | 1.1 | 29.0022 | 37.1   | 0.0190  | 37.8   | 0.0040 | 7.1  | 0.19 | 25.7  | 1.8  | 19.1    | 7.2    | -750.4  | 1072.8 | 25.7  | 1.8  |
| CHISANA Spot 91  | 69   | 2497  | 2.8 | 23.6744 | 32.6   | 0.0987  | 34.0   | 0.0170 | 9.5  | 0.28 | 108.4 | 10.2 | 95.6    | 31.0   | -212.2  | 837.7  | 108.4 | 10.2 |
| CHISANA Spot 51  | 43   | 2035  | 2.7 | 22.0923 | 73.5   | 0.1085  | 74.5   | 0.0174 | 12.2 | 0.16 | 111.1 | 13.4 | 104.6   | 74.1   | -41.4   | 2087.1 | 111.1 | 13.4 |
| CHISANA Spot 88  | 104  | 5496  | 2.2 | 17.1538 | 33.8   | 0.1439  | 34.5   | 0.0179 | 6.7  | 0.20 | 114.4 | 7.6  | 136.5   | 44.0   | 540.9   | 759.3  | 114.4 | 7.6  |
| CHISANA Spot 04  | 94   | 4041  | 2.1 | 21.7860 | 37.7   | 0.1136  | 38.4   | 0.0180 | 7.5  | 0.19 | 114.7 | 8.5  | 109.3   | 39.8   | -7.6    | 939.6  | 114.7 | 8.5  |
| CHISANA Spot 49  | 96   | 4020  | 3.0 | 21.4881 | 73.6   | 0.1155  | 73.8   | 0.0180 | 5.8  | 0.08 | 115.0 | 6.6  | 110.9   | 77.8   | 25.6    | 2069.3 | 115.0 | 6.6  |
| CHISANA Spot 44  | 177  | 5606  | 2.5 | 23.4806 | 14.4   | 0.1059  | 14.6   | 0.0180 | 2.4  | 0.17 | 115.3 | 2.8  | 102.2   | 14.2   | -191.6  | 362.7  | 115.3 | 2.8  |
| CHISANA Spot 47  | 221  | 11650 | 2.3 | 20.6843 | 14.4   | 0.1203  | 14.6   | 0.0180 | 2.2  | 0.15 | 115.3 | 2.5  | 115.3   | 15.9   | 116.2   | 342.1  | 115.3 | 2.5  |
| CHISANA Spot 14  | 61   | 2405  | 2.8 | 25.7199 | 42.8   | 0.0969  | 43.6   | 0.0181 | 8.7  | 0.20 | 115.5 | 9.9  | 93.9    | 39.2   | -424.8  | 1166.6 | 115.5 | 9.9  |
| CHISANA Spot 11  | 82   | 2786  | 2.0 | 20.9497 | 40.9   | 0.1191  | 41.6   | 0.0181 | 7.8  | 0.19 | 115.6 | 9.0  | 114.2   | 45.0   | 86.1    | 1007.0 | 115.6 | 9.0  |
| CHISANA Spot 17  | 132  | 8889  | 3.2 | 22.9357 | 27.6   | 0.1088  | 28.5   | 0.0181 | 7.0  | 0.25 | 115.7 | 8.1  | 104.9   | 28.4   | -133.2  | 693.3  | 115.7 | 8.1  |
| CHISANA Spot 01  | 77   | 2804  | 2.7 | 13.6864 | 34.1   | 0.1827  | 35.9   | 0.0181 | 11.3 | 0.31 | 115.8 | 12.9 | 170.3   | 56.4   | 1015.7  | 711.9  | 115.8 | 12.9 |
| CHISANA Spot 41  | 233  | 9666  | 1.9 | 21.2767 | 13.7   | 0.1178  | 13.8   | 0.0182 | 1.8  | 0.13 | 116.2 | 2.1  | 113.1   | 14.8   | 49.2    | 328.2  | 116.2 | 2.1  |

|                  |      |        |     |         |       |        |       |        |      |      |       |      |       |       |        |        |       |      |
|------------------|------|--------|-----|---------|-------|--------|-------|--------|------|------|-------|------|-------|-------|--------|--------|-------|------|
| CHISANA Spot 87  | 253  | 22480  | 2.1 | 19.9012 | 14.7  | 0.1266 | 15.3  | 0.0183 | 4.3  | 0.28 | 116.8 | 5.0  | 121.1 | 17.5  | 206.5  | 341.8  | 116.8 | 5.0  |
| CHISANA Spot 78  | 238  | 11173  | 2.2 | 20.3976 | 9.9   | 0.1236 | 10.2  | 0.0183 | 2.6  | 0.26 | 116.8 | 3.0  | 118.3 | 11.4  | 149.1  | 231.6  | 116.8 | 3.0  |
| CHISANA Spot 72  | 138  | 5993   | 2.2 | 25.3818 | 26.8  | 0.0996 | 27.1  | 0.0183 | 4.2  | 0.15 | 117.1 | 4.8  | 96.4  | 25.0  | -390.2 | 708.6  | 117.1 | 4.8  |
| CHISANA Spot 46  | 241  | 11013  | 3.4 | 20.3649 | 11.4  | 0.1242 | 12.0  | 0.0184 | 3.5  | 0.29 | 117.2 | 4.1  | 118.9 | 13.4  | 152.8  | 268.6  | 117.2 | 4.1  |
| CHISANA Spot 29  | 146  | 3954   | 2.1 | 26.2396 | 22.6  | 0.0967 | 23.0  | 0.0184 | 4.5  | 0.19 | 117.6 | 5.2  | 93.8  | 20.6  | -477.5 | 604.6  | 117.6 | 5.2  |
| CHISANA Spot 09  | 189  | 11163  | 1.8 | 23.4573 | 16.7  | 0.1083 | 16.9  | 0.0184 | 2.7  | 0.16 | 117.7 | 3.2  | 104.4 | 16.8  | -189.1 | 420.2  | 117.7 | 3.2  |
| CHISANA Spot 45  | 375  | 12583  | 2.8 | 21.4687 | 8.4   | 0.1185 | 8.6   | 0.0185 | 1.8  | 0.21 | 117.9 | 2.1  | 113.7 | 9.3   | 27.7   | 202.5  | 117.9 | 2.1  |
| CHISANA Spot 56  | 143  | 13662  | 2.2 | 17.4377 | 17.7  | 0.1461 | 18.0  | 0.0185 | 2.9  | 0.16 | 118.0 | 3.4  | 138.5 | 23.3  | 504.9  | 392.9  | 118.0 | 3.4  |
| CHISANA Spot 98  | 116  | 4485   | 2.1 | 22.3849 | 21.2  | 0.1138 | 21.6  | 0.0185 | 4.4  | 0.20 | 118.0 | 5.2  | 109.4 | 22.4  | -73.4  | 522.3  | 118.0 | 5.2  |
| CHISANA Spot 105 | 91   | 9398   | 2.9 | 31.0822 | 41.9  | 0.0820 | 42.3  | 0.0185 | 5.4  | 0.13 | 118.1 | 6.3  | 80.0  | 32.5  | -949.1 | 1274.6 | 118.1 | 6.3  |
| CHISANA Spot 61  | 58   | 3428   | 2.6 | 14.3848 | 28.9  | 0.1774 | 29.5  | 0.0185 | 6.2  | 0.21 | 118.2 | 7.2  | 165.9 | 45.2  | 914.2  | 605.9  | 118.2 | 7.2  |
| CHISANA Spot 57  | 53   | 5522   | 2.5 | 22.5862 | 141.5 | 0.1132 | 142.0 | 0.0186 | 11.7 | 0.08 | 118.5 | 13.8 | 108.9 | 147.7 | -95.4  | 1518.9 | 118.5 | 13.8 |
| CHISANA Spot 96  | 90   | 2918   | 2.2 | 19.4980 | 26.5  | 0.1314 | 26.8  | 0.0186 | 3.9  | 0.15 | 118.7 | 4.6  | 125.3 | 31.6  | 253.8  | 618.8  | 118.7 | 4.6  |
| CHISANA Spot 50  | 104  | 4963   | 2.2 | 19.4411 | 28.3  | 0.1317 | 28.7  | 0.0186 | 4.5  | 0.16 | 118.7 | 5.3  | 125.7 | 33.9  | 260.5  | 662.3  | 118.7 | 5.3  |
| CHISANA Spot 73  | 76   | 9147   | 1.8 | 18.8866 | 76.3  | 0.1356 | 76.8  | 0.0186 | 9.0  | 0.12 | 118.7 | 10.6 | 129.1 | 93.4  | 326.5  | 2078.5 | 118.7 | 10.6 |
| CHISANA Spot 32  | 87   | 2253   | 2.1 | 18.1468 | 51.1  | 0.1422 | 51.8  | 0.0187 | 8.7  | 0.17 | 119.5 | 10.3 | 135.0 | 65.6  | 416.5  | 1218.7 | 119.5 | 10.3 |
| CHISANA Spot 28  | 80   | 3799   | 2.1 | 26.7051 | 41.0  | 0.0967 | 41.3  | 0.0187 | 4.7  | 0.11 | 119.6 | 5.5  | 93.7  | 36.9  | -524.3 | 1136.8 | 119.6 | 5.5  |
| CHISANA Spot 90  | 123  | 7417   | 2.6 | 20.1909 | 27.7  | 0.1280 | 28.2  | 0.0187 | 4.9  | 0.17 | 119.7 | 5.8  | 122.3 | 32.5  | 172.8  | 658.4  | 119.7 | 5.8  |
| CHISANA Spot 53  | 106  | 4397   | 2.9 | 18.2908 | 21.2  | 0.1416 | 21.6  | 0.0188 | 4.5  | 0.21 | 120.0 | 5.3  | 134.5 | 27.2  | 398.8  | 478.8  | 120.0 | 5.3  |
| CHISANA Spot 02  | 101  | 4851   | 2.7 | 21.1077 | 35.1  | 0.1228 | 35.2  | 0.0188 | 3.3  | 0.09 | 120.1 | 3.9  | 117.6 | 39.2  | 68.2   | 858.2  | 120.1 | 3.9  |
| CHISANA Spot 81  | 110  | 5058   | 1.7 | 24.8228 | 51.3  | 0.1045 | 51.5  | 0.0188 | 4.5  | 0.09 | 120.2 | 5.4  | 100.9 | 49.5  | -332.6 | 1400.8 | 120.2 | 5.4  |
| CHISANA Spot 64  | 134  | 10847  | 2.2 | 20.3046 | 14.3  | 0.1281 | 14.5  | 0.0189 | 2.3  | 0.16 | 120.5 | 2.8  | 122.4 | 16.7  | 159.7  | 336.6  | 120.5 | 2.8  |
| CHISANA Spot 95  | 120  | 13989  | 2.6 | 19.5441 | 33.5  | 0.1341 | 33.7  | 0.0190 | 3.9  | 0.12 | 121.3 | 4.7  | 127.7 | 40.5  | 248.3  | 790.7  | 121.3 | 4.7  |
| CHISANA Spot 25  | 158  | 8601   | 3.4 | 20.7508 | 18.1  | 0.1264 | 18.3  | 0.0190 | 3.1  | 0.17 | 121.5 | 3.7  | 120.9 | 20.9  | 108.7  | 429.7  | 121.5 | 3.7  |
| CHISANA Spot 34  | 60   | 5137   | 2.8 | 19.8154 | 32.1  | 0.1324 | 32.6  | 0.0190 | 5.7  | 0.18 | 121.5 | 6.9  | 126.3 | 38.7  | 216.5  | 761.0  | 121.5 | 6.9  |
| CHISANA Spot 65  | 93   | 5400   | 3.3 | 21.6664 | 25.8  | 0.1215 | 26.2  | 0.0191 | 5.0  | 0.19 | 121.9 | 6.0  | 116.4 | 28.9  | 5.7    | 629.4  | 121.9 | 6.0  |
| CHISANA Spot 84  | 154  | 9897   | 1.6 | 18.5068 | 13.0  | 0.1428 | 13.2  | 0.0192 | 2.5  | 0.19 | 122.4 | 3.0  | 135.6 | 16.8  | 372.5  | 293.7  | 122.4 | 3.0  |
| CHISANA Spot 62  | 262  | 11883  | 2.4 | 20.9643 | 8.9   | 0.1261 | 9.4   | 0.0192 | 2.9  | 0.31 | 122.4 | 3.6  | 120.6 | 10.7  | 84.4   | 211.6  | 122.4 | 3.6  |
| CHISANA Spot 93  | 68   | 6106   | 2.6 | 18.0660 | 34.8  | 0.1470 | 36.3  | 0.0193 | 10.4 | 0.29 | 123.0 | 12.7 | 139.3 | 47.3  | 426.5  | 798.9  | 123.0 | 12.7 |
| CHISANA Spot 54  | 59   | 4438   | 2.2 | 17.8388 | 34.5  | 0.1562 | 37.8  | 0.0202 | 15.5 | 0.41 | 128.9 | 19.8 | 147.3 | 51.9  | 454.6  | 787.7  | 128.9 | 19.8 |
| CHISANA Spot 104 | 93   | 6674   | 2.9 | 21.3217 | 40.1  | 0.1457 | 40.3  | 0.0225 | 4.6  | 0.11 | 143.6 | 6.5  | 138.1 | 52.1  | 44.1   | 993.5  | 143.6 | 6.5  |
| CHISANA Spot 101 | 115  | 11468  | 3.6 | 21.9245 | 22.1  | 0.1417 | 22.5  | 0.0225 | 4.1  | 0.18 | 143.7 | 5.9  | 134.6 | 28.4  | -22.9  | 541.0  | 143.7 | 5.9  |
| CHISANA Spot 08  | 521  | 19526  | 3.9 | 20.2246 | 3.9   | 0.1574 | 4.0   | 0.0231 | 1.0  | 0.25 | 147.2 | 1.5  | 148.4 | 5.5   | 169.0  | 90.8   | 147.2 | 1.5  |
| CHISANA Spot 10  | 218  | 8761   | 3.7 | 21.8557 | 5.6   | 0.1462 | 6.0   | 0.0232 | 2.1  | 0.36 | 147.7 | 3.1  | 138.5 | 7.7   | -15.3  | 134.9  | 147.7 | 3.1  |
| CHISANA Spot 40  | 1745 | 93610  | 4.0 | 20.2317 | 1.4   | 0.1599 | 1.6   | 0.0235 | 0.7  | 0.46 | 149.5 | 1.1  | 150.6 | 2.2   | 168.1  | 33.1   | 149.5 | 1.1  |
| CHISANA Spot 102 | 872  | 110857 | 7.3 | 19.3132 | 2.6   | 0.2498 | 2.9   | 0.0350 | 1.4  | 0.47 | 221.7 | 3.0  | 226.4 | 5.9   | 275.6  | 58.4   | 172.9 | 5.1  |
| CHISANA Spot 13  | 383  | 38929  | 4.3 | 19.0694 | 2.7   | 0.3500 | 2.8   | 0.0484 | 0.8  | 0.30 | 304.7 | 2.5  | 304.7 | 7.4   | 304.6  | 61.4   | 221.7 | 3.0  |
| CHISANA Spot 85  | 1566 | 170098 | 6.3 | 18.9847 | 0.8   | 0.3725 | 1.9   | 0.0513 | 1.7  | 0.91 | 322.4 | 5.4  | 321.5 | 5.2   | 314.8  | 17.5   | 304.7 | 2.5  |

**Nenana Spot River (modern river sand)**

|                  |      |        |     |         |      |        |      |        |     |      |       |     |       |     |       |       |       |     |
|------------------|------|--------|-----|---------|------|--------|------|--------|-----|------|-------|-----|-------|-----|-------|-------|-------|-----|
| Nabesna-Spot 31  | 122  | 1061   | 2.6 | 24.9334 | 15.5 | 0.0046 | 16.7 | 0.0008 | 6.3 | 0.38 | 5.3   | 0.3 | 4.6   | 0.8 | 344.0 | 400.7 | 5.3   | 0.3 |
| Nabesna-Spot 100 | 103  | 6920   | 3.3 | 22.1038 | 10.1 | 0.0161 | 11.3 | 0.0026 | 5.0 | 0.44 | 16.6  | 0.8 | 16.2  | 1.8 | 42.6  | 246.7 | 16.6  | 0.8 |
| Nabesna-Spot 20  | 164  | 2078   | 2.8 | 23.1134 | 8.4  | 0.0175 | 9.0  | 0.0029 | 3.3 | 0.36 | 18.8  | 0.6 | 17.6  | 1.6 | 152.3 | 209.2 | 18.8  | 0.6 |
| Nabesna-Spot 49  | 291  | 9849   | 2.0 | 20.3226 | 6.5  | 0.0222 | 6.9  | 0.0033 | 2.4 | 0.34 | 21.1  | 0.5 | 22.3  | 1.5 | 157.7 | 152.6 | 21.1  | 0.5 |
| Nabesna-Spot 18  | 263  | 8454   | 2.5 | 22.0197 | 7.0  | 0.0218 | 7.4  | 0.0035 | 2.2 | 0.30 | 22.4  | 0.5 | 21.9  | 1.6 | 33.4  | 170.6 | 22.4  | 0.5 |
| Nabesna-Spot 107 | 207  | 6242   | 2.0 | 20.9528 | 7.3  | 0.0234 | 7.8  | 0.0036 | 2.7 | 0.35 | 22.9  | 0.6 | 23.5  | 1.8 | 85.7  | 173.3 | 22.9  | 0.6 |
| Nabesna-Spot 9   | 64   | 4323   | 2.8 | 29.9370 | 49.8 | 0.0469 | 20.3 | 0.0037 | 4.5 | 0.22 | 23.5  | 4.4 | 47.0  | 3.4 | 840.4 | 574.5 | 23.5  | 4.4 |
| Nabesna-Spot 85  | 89   | 34219  | 2.7 | 18.8952 | 5.4  | 0.1303 | 5.7  | 0.0179 | 1.7 | 0.30 | 114.1 | 1.9 | 124.3 | 6.7 | 325.5 | 123.8 | 114.1 | 1.9 |
| Nabesna-Spot 101 | 125  | 9121   | 2.8 | 20.1016 | 3.8  | 0.1232 | 4.2  | 0.0180 | 1.8 | 0.43 | 114.8 | 2.1 | 118.0 | 4.7 | 183.2 | 88.7  | 114.8 | 2.1 |
| Nabesna-Spot 33  | 128  | 17015  | 2.1 | 19.5141 | 5.3  | 0.1276 | 5.5  | 0.0181 | 1.6 | 0.29 | 115.3 | 1.9 | 121.9 | 6.3 | 251.9 | 121.4 | 115.3 | 1.9 |
| Nabesna-Spot 38  | 94   | 22829  | 1.9 | 19.8388 | 4.4  | 0.1256 | 4.6  | 0.0181 | 1.2 | 0.26 | 115.4 | 1.4 | 120.1 | 5.2 | 213.8 | 102.1 | 115.4 | 1.4 |
| Nabesna-Spot 65  | 243  | 52273  | 1.4 | 19.9012 | 3.0  | 0.1254 | 3.2  | 0.0181 | 1.1 | 0.34 | 115.6 | 1.2 | 120.0 | 3.7 | 206.5 | 70.7  | 115.6 | 1.2 |
| Nabesna-Spot 63  | 161  | 13162  | 2.6 | 20.8506 | 4.4  | 0.1198 | 4.6  | 0.0181 | 1.5 | 0.32 | 115.7 | 1.7 | 114.9 | 5.0 | 97.3  | 103.8 | 115.7 | 1.7 |
| Nabesna-Spot 103 | 181  | 14706  | 2.4 | 20.5158 | 4.1  | 0.1218 | 4.3  | 0.0181 | 1.5 | 0.35 | 115.8 | 1.7 | 116.7 | 4.8 | 135.5 | 95.7  | 115.8 | 1.7 |
| Nabesna-Spot 87  | 216  | 91804  | 2.2 | 19.7409 | 3.8  | 0.1268 | 4.0  | 0.0181 | 1.3 | 0.33 | 116.0 | 1.5 | 121.2 | 4.6 | 225.2 | 87.4  | 116.0 | 1.5 |
| Nabesna-Spot 46  | 279  | 64003  | 1.4 | 19.9356 | 2.7  | 0.1255 | 2.9  | 0.0182 | 1.0 | 0.35 | 116.0 | 1.2 | 120.1 | 3.2 | 202.5 | 62.2  | 116.0 | 1.2 |
| Nabesna-Spot 17  | 211  | 303553 | 1.6 | 19.0640 | 4.0  | 0.1313 | 4.1  | 0.0182 | 1.1 | 0.25 | 116.0 | 1.2 | 125.3 | 4.9 | 305.3 | 91.1  | 116.0 | 1.2 |
| Nabesna-Spot 1   | 300  | 57388  | 2.3 | 20.2575 | 3.7  | 0.1236 | 4.1  | 0.0182 | 1.6 | 0.40 | 116.0 | 1.9 | 118.4 | 4.5 | 165.2 | 87.1  | 116.0 | 1.9 |
| Nabesna-Spot 98  | 507  | 51439  | 1.8 | 20.5092 | 2.2  | 0.1221 | 2.6  | 0.0182 | 1.3 | 0.50 | 116.1 | 1.5 | 117.0 | 2.8 | 136.2 | 52.5  | 116.1 | 1.5 |
| Nabesna-Spot 15  | 1323 | 236554 | 2.2 | 20.4125 | 1.3  | 0.1228 | 1.6  | 0.0182 | 1.0 | 0.60 | 116.1 | 1.1 | 117.6 | 1.8 | 147.4 | 30.2  | 116.1 | 1.1 |
| Nabesna-Spot 11  | 63   | 14659  | 3.4 | 19.1732 | 6.6  | 0.1312 | 6.9  | 0.0182 | 2.1 | 0.30 | 116.5 | 2.4 | 125.1 | 8.2 | 292.3 | 151.0 | 116.5 | 2.4 |
| Nabesna-Spot 12  | 142  | 140837 | 1.6 | 19.5098 | 4.4  | 0.1290 | 4.7  | 0.0183 | 1.5 | 0.32 | 116.6 | 1.8 | 123.2 | 5.4 | 252.4 | 102.2 | 116.6 | 1.8 |
| Nabesna-Spot 8   | 123  | 14399  | 2.2 | 18.9091 | 5.1  | 0.1333 | 5.4  | 0.0183 | 1.8 | 0.33 | 116.8 | 2.0 | 127.0 | 6.4 | 323.9 | 115.2 | 116.8 | 2.0 |
| Nabesna-Spot 86  | 119  | 56726  | 1.8 | 19.8566 | 3.6  | 0.1270 | 3.9  | 0.0183 | 1.6 | 0.40 | 116.9 | 1.8 | 121.4 | 4.5 | 211.7 | 83.4  | 116.9 | 1.8 |
| Nabesna-Spot 64  | 102  | 39186  | 3.2 | 20.4422 | 5.4  | 0.1234 | 5.6  | 0.0183 | 1.3 | 0.24 | 116.9 | 1.5 | 118.2 | 6.2 | 143.9 | 127.6 | 116.9 | 1.5 |
| Nabesna-Spot 13  | 118  | 18029  | 3.1 | 19.9436 | 3.7  | 0.1266 | 4.0  | 0.0183 | 1.5 | 0.38 | 116.9 | 1.7 | 121.0 | 4.6 | 201.6 | 86.6  | 116.9 | 1.7 |
| Nabesna-Spot 106 | 113  | 45316  | 1.9 | 19.8659 | 4.5  | 0.1271 | 4.9  | 0.0183 | 1.9 | 0.38 | 116.9 | 2.2 | 121.5 | 5.6 | 210.6 | 105.0 | 116.9 | 2.2 |
| Nabesna-Spot 76  | 145  | 44883  | 1.9 | 20.3622 | 3.7  | 0.1241 | 4.0  | 0.0183 | 1.5 | 0.37 | 117.0 | 1.7 | 118.7 | 4.4 | 153.1 | 86.4  | 117.0 | 1.7 |
| Nabesna-Spot 93  | 91   | 17767  | 3.0 | 19.8065 | 5.1  | 0.1275 | 5.3  | 0.0183 | 1.5 | 0.29 | 117.0 | 1.8 | 121.9 | 6.1 | 217.6 | 117.2 | 117.0 | 1.8 |
| Nabesna-Spot 60  | 488  | 270517 | 4.4 | 20.0423 | 2.2  | 0.1262 | 2.4  | 0.0183 | 1.0 | 0.40 | 117.2 | 1.1 | 120.7 | 2.8 | 190.1 | 51.9  | 117.2 | 1.1 |
| Nabesna-Spot 24  | 416  | 119062 | 4.0 | 19.9857 | 2.2  | 0.1266 | 2.4  | 0.0184 | 1.1 | 0.43 | 117.2 | 1.2 | 121.1 | 2.8 | 196.7 | 51.3  | 117.2 | 1.2 |
| Nabesna-Spot 69  | 709  | 64007  | 2.6 | 20.6293 | 1.5  | 0.1227 | 1.9  | 0.0184 | 1.2 | 0.63 | 117.3 | 1.4 | 117.5 | 2.2 | 122.5 | 35.5  | 117.3 | 1.4 |
| Nabesna-Spot 57  | 169  | 27806  | 2.9 | 19.4005 | 4.7  | 0.1306 | 5.0  | 0.0184 | 1.5 | 0.31 | 117.4 | 1.8 | 124.7 | 5.8 | 265.3 | 108.9 | 117.4 | 1.8 |
| Nabesna-Spot 37  | 150  | 35210  | 1.6 | 20.0929 | 3.8  | 0.1261 | 4.1  | 0.0184 | 1.6 | 0.38 | 117.4 | 1.8 | 120.6 | 4.7 | 184.2 | 89.1  | 117.4 | 1.8 |
| Nabesna-Spot 41  | 296  | 64576  | 3.9 | 20.5882 | 2.8  | 0.1231 | 3.0  | 0.0184 | 1.2 | 0.40 | 117.4 | 1.4 | 117.9 | 3.4 | 127.2 | 65.2  | 117.4 | 1.4 |
| Nabesna-Spot 50  | 185  | 50913  | 2.1 | 19.7073 | 4.1  | 0.1287 | 4.3  | 0.0184 | 1.4 | 0.32 | 117.5 | 1.6 | 122.9 | 5.0 | 229.1 | 93.7  | 117.5 | 1.6 |
| Nabesna-Spot 108 | 95   | 12568  | 2.5 | 17.5785 | 7.4  | 0.1443 | 7.6  | 0.0184 | 2.0 | 0.26 | 117.5 | 2.3 | 136.9 | 9.8 | 487.2 | 163.3 | 117.5 | 2.3 |
| Nabesna-Spot 66  | 233  | 69888  | 2.5 | 20.5814 | 2.5  | 0.1233 | 2.7  | 0.0184 | 1.2 | 0.42 | 117.6 | 1.3 | 118.0 | 3.1 | 128.0 | 58.5  | 117.6 | 1.3 |
| Nabesna-Spot 102 | 107  | 17672  | 2.1 | 20.0653 | 4.9  | 0.1265 | 5.2  | 0.0184 | 2.0 | 0.37 | 117.6 | 2.3 | 120.9 | 6.0 | 187.4 | 113.5 | 117.6 | 2.3 |
| Nabesna-Spot 32  | 162  | 56142  | 1.8 | 20.9988 | 4.0  | 0.1209 | 4.1  | 0.0184 | 1.1 | 0.26 | 117.6 | 1.2 | 115.9 | 4.5 | 80.5  | 94.8  | 117.6 | 1.2 |
| Nabesna-Spot 105 | 99   | 6895   | 2.3 | 20.7308 | 5.8  | 0.1226 | 6.2  | 0.0184 | 2.0 | 0.33 | 117.7 | 2.4 | 117.4 | 6.9 | 110.9 | 137.9 | 117.7 | 2.4 |
| Nabesna-Spot 109 | 124  | 24349  | 3.5 | 16.3298 | 5.6  | 0.1556 | 5.9  | 0.0184 | 1.8 | 0.31 | 117.7 | 2.1 | 146.9 | 8.0 | 647.6 | 120.3 | 117.7 | 2.1 |

|                  |     |        |     |         |      |        |      |        |     |      |        |      |        |      |        |       |       |     |
|------------------|-----|--------|-----|---------|------|--------|------|--------|-----|------|--------|------|--------|------|--------|-------|-------|-----|
| Nabesna-Spot 14  | 103 | 50099  | 1.8 | 20.8396 | 4.6  | 0.1221 | 4.8  | 0.0185 | 1.4 | 0.29 | 117.9  | 1.6  | 117.0  | 5.3  | 98.5   | 109.7 | 117.9 | 1.6 |
| Nabesna-Spot 39  | 129 | 20972  | 2.0 | 18.9430 | 4.1  | 0.1343 | 4.5  | 0.0185 | 1.7 | 0.39 | 117.9  | 2.0  | 128.0  | 5.4  | 319.8  | 93.3  | 117.9 | 2.0 |
| Nabesna-Spot 62  | 109 | 25374  | 3.0 | 20.7395 | 4.3  | 0.1227 | 4.6  | 0.0185 | 1.6 | 0.35 | 117.9  | 1.9  | 117.5  | 5.1  | 109.9  | 101.7 | 117.9 | 1.9 |
| Nabesna-Spot 21  | 518 | 405771 | 3.0 | 19.7022 | 2.3  | 0.1293 | 2.6  | 0.0185 | 1.2 | 0.48 | 118.0  | 1.4  | 123.4  | 3.0  | 229.7  | 52.4  | 118.0 | 1.4 |
| Nabesna-Spot 84  | 143 | 14782  | 1.7 | 20.6177 | 3.6  | 0.1235 | 3.8  | 0.0185 | 1.4 | 0.35 | 118.0  | 1.6  | 118.3  | 4.3  | 123.8  | 84.2  | 118.0 | 1.6 |
| Nabesna-Spot 83  | 78  | 7411   | 2.1 | 21.5405 | 5.7  | 0.1182 | 6.0  | 0.0185 | 1.9 | 0.31 | 118.0  | 2.2  | 113.5  | 6.5  | 19.7   | 138.1 | 118.0 | 2.2 |
| Nabesna-Spot 77  | 88  | 52698  | 2.5 | 19.7870 | 6.2  | 0.1287 | 6.4  | 0.0185 | 1.7 | 0.26 | 118.0  | 2.0  | 123.0  | 7.4  | 219.8  | 143.4 | 118.0 | 2.0 |
| Nabesna-Spot 16  | 315 | 54997  | 2.2 | 20.1296 | 3.3  | 0.1266 | 3.5  | 0.0185 | 1.1 | 0.33 | 118.0  | 1.3  | 121.0  | 4.0  | 179.9  | 77.5  | 118.0 | 1.3 |
| Nabesna-Spot 89  | 83  | 16688  | 2.1 | 19.7212 | 6.1  | 0.1294 | 6.5  | 0.0185 | 2.1 | 0.33 | 118.2  | 2.5  | 123.5  | 7.6  | 227.5  | 141.9 | 118.2 | 2.5 |
| Nabesna-Spot 42  | 227 | 196271 | 3.1 | 20.3667 | 3.6  | 0.1253 | 4.0  | 0.0185 | 1.7 | 0.42 | 118.2  | 1.9  | 119.9  | 4.5  | 152.6  | 84.7  | 118.2 | 1.9 |
| Nabesna-Spot 67  | 84  | 34871  | 1.9 | 19.0623 | 6.3  | 0.1339 | 6.6  | 0.0185 | 1.9 | 0.29 | 118.2  | 2.2  | 127.6  | 7.9  | 305.5  | 144.4 | 118.2 | 2.2 |
| Nabesna-Spot 22  | 106 | 9599   | 2.1 | 19.7700 | 5.2  | 0.1292 | 5.6  | 0.0185 | 2.1 | 0.37 | 118.3  | 2.4  | 123.4  | 6.5  | 221.8  | 120.0 | 118.3 | 2.4 |
| Nabesna-Spot 81  | 98  | 26204  | 2.7 | 20.6692 | 5.2  | 0.1236 | 5.5  | 0.0185 | 1.8 | 0.32 | 118.4  | 2.1  | 118.3  | 6.2  | 118.0  | 123.1 | 118.4 | 2.1 |
| Nabesna-Spot 75  | 212 | 44857  | 2.9 | 20.3183 | 3.4  | 0.1258 | 3.7  | 0.0185 | 1.5 | 0.42 | 118.4  | 1.8  | 120.3  | 4.2  | 158.2  | 78.6  | 118.4 | 1.8 |
| Nabesna-Spot 59  | 119 | 45644  | 2.4 | 20.6218 | 4.2  | 0.1240 | 4.5  | 0.0185 | 1.6 | 0.36 | 118.5  | 1.9  | 118.7  | 5.0  | 123.3  | 97.9  | 118.5 | 1.9 |
| Nabesna-Spot 55  | 82  | 60756  | 1.9 | 19.5318 | 4.6  | 0.1310 | 5.0  | 0.0186 | 1.9 | 0.37 | 118.5  | 2.2  | 125.0  | 5.9  | 249.8  | 106.8 | 118.5 | 2.2 |
| Nabesna-Spot 70  | 75  | 12886  | 2.2 | 20.5834 | 5.6  | 0.1243 | 5.9  | 0.0186 | 2.0 | 0.34 | 118.5  | 2.4  | 119.0  | 6.6  | 127.8  | 131.1 | 118.5 | 2.4 |
| Nabesna-Spot 44  | 214 | 15206  | 2.5 | 21.0572 | 3.2  | 0.1217 | 3.4  | 0.0186 | 1.2 | 0.34 | 118.7  | 1.4  | 116.6  | 3.8  | 73.9   | 76.5  | 118.7 | 1.4 |
| Nabesna-Spot 91  | 89  | 8735   | 3.5 | 20.9513 | 5.1  | 0.1223 | 5.5  | 0.0186 | 2.2 | 0.40 | 118.7  | 2.6  | 117.2  | 6.1  | 85.9   | 119.9 | 118.7 | 2.6 |
| Nabesna-Spot 7   | 260 | 48339  | 1.7 | 20.3516 | 3.6  | 0.1260 | 3.9  | 0.0186 | 1.3 | 0.33 | 118.8  | 1.5  | 120.5  | 4.4  | 154.3  | 85.3  | 118.8 | 1.5 |
| Nabesna-Spot 25  | 169 | 453870 | 1.8 | 19.6156 | 3.4  | 0.1309 | 3.7  | 0.0186 | 1.6 | 0.43 | 118.9  | 1.9  | 124.9  | 4.4  | 239.9  | 77.4  | 118.9 | 1.9 |
| Nabesna-Spot 26  | 136 | 142068 | 1.8 | 19.8907 | 4.8  | 0.1291 | 4.9  | 0.0186 | 1.3 | 0.27 | 119.0  | 1.6  | 123.3  | 5.7  | 207.7  | 110.5 | 119.0 | 1.6 |
| Nabesna-Spot 40  | 78  | 467023 | 2.6 | 21.1013 | 5.2  | 0.1217 | 5.5  | 0.0186 | 1.6 | 0.30 | 119.0  | 1.9  | 116.6  | 6.1  | 68.9   | 124.8 | 119.0 | 1.9 |
| Nabesna-Spot 6   | 97  | 48714  | 1.8 | 19.2190 | 4.8  | 0.1337 | 5.0  | 0.0186 | 1.6 | 0.31 | 119.0  | 1.9  | 127.4  | 6.0  | 286.8  | 109.6 | 119.0 | 1.9 |
| Nabesna-Spot 51  | 90  | 61596  | 1.9 | 19.7704 | 4.2  | 0.1300 | 4.5  | 0.0186 | 1.6 | 0.35 | 119.0  | 1.9  | 124.1  | 5.3  | 221.8  | 98.1  | 119.0 | 1.9 |
| Nabesna-Spot 29  | 177 | 392457 | 3.5 | 20.0745 | 3.2  | 0.1280 | 3.5  | 0.0186 | 1.4 | 0.40 | 119.0  | 1.6  | 122.3  | 4.0  | 186.3  | 74.9  | 119.0 | 1.6 |
| Nabesna-Spot 47  | 141 | 127403 | 2.3 | 20.1952 | 3.5  | 0.1273 | 3.8  | 0.0186 | 1.6 | 0.40 | 119.1  | 1.8  | 121.7  | 4.4  | 172.3  | 81.9  | 119.1 | 1.8 |
| Nabesna-Spot 99  | 211 | 108095 | 1.6 | 19.7640 | 3.3  | 0.1302 | 3.5  | 0.0187 | 1.1 | 0.33 | 119.2  | 1.3  | 124.3  | 4.1  | 222.5  | 76.4  | 119.2 | 1.3 |
| Nabesna-Spot 36  | 236 | 111250 | 2.6 | 20.3521 | 3.1  | 0.1265 | 3.3  | 0.0187 | 1.0 | 0.31 | 119.2  | 1.2  | 120.9  | 3.8  | 154.3  | 73.7  | 119.2 | 1.2 |
| Nabesna-Spot 48  | 108 | 23099  | 2.3 | 21.0687 | 4.3  | 0.1222 | 4.7  | 0.0187 | 1.9 | 0.41 | 119.3  | 2.2  | 117.1  | 5.2  | 72.6   | 101.3 | 119.3 | 2.2 |
| Nabesna-Spot 3   | 72  | 8303   | 2.3 | 19.8854 | 5.0  | 0.1295 | 5.2  | 0.0187 | 1.4 | 0.27 | 119.3  | 1.6  | 123.6  | 6.0  | 208.4  | 116.1 | 119.3 | 1.6 |
| Nabesna-Spot 94  | 89  | 77481  | 2.1 | 19.8085 | 4.9  | 0.1301 | 5.3  | 0.0187 | 2.0 | 0.39 | 119.3  | 2.4  | 124.2  | 6.2  | 217.3  | 113.3 | 119.3 | 2.4 |
| Nabesna-Spot 82  | 156 | 36858  | 1.9 | 21.0013 | 4.3  | 0.1227 | 4.4  | 0.0187 | 0.9 | 0.20 | 119.4  | 1.0  | 117.6  | 4.8  | 80.2   | 101.4 | 119.4 | 1.0 |
| Nabesna-Spot 79  | 129 | 33235  | 1.8 | 21.0102 | 4.6  | 0.1227 | 4.8  | 0.0187 | 1.6 | 0.33 | 119.4  | 1.9  | 117.5  | 5.4  | 79.2   | 108.4 | 119.4 | 1.9 |
| Nabesna-Spot 92  | 274 | 70744  | 1.7 | 20.5461 | 2.8  | 0.1258 | 3.2  | 0.0187 | 1.4 | 0.45 | 119.7  | 1.7  | 120.3  | 3.6  | 132.0  | 66.5  | 119.7 | 1.7 |
| Nabesna-Spot 4   | 70  | 18278  | 3.1 | 19.8495 | 6.5  | 0.1303 | 6.8  | 0.0188 | 1.9 | 0.28 | 119.8  | 2.3  | 124.3  | 7.9  | 212.5  | 150.2 | 119.8 | 2.3 |
| Nabesna-Spot 23  | 108 | 22195  | 2.8 | 20.6530 | 4.2  | 0.1253 | 4.5  | 0.0188 | 1.7 | 0.37 | 119.9  | 2.0  | 119.9  | 5.1  | 119.8  | 99.1  | 119.9 | 2.0 |
| Nabesna-Spot 35  | 49  | 29647  | 2.2 | 20.7339 | 6.5  | 0.1249 | 6.8  | 0.0188 | 1.9 | 0.29 | 119.9  | 2.3  | 119.5  | 7.7  | 110.6  | 154.3 | 119.9 | 2.3 |
| Nabesna-Spot 53  | 80  | 160264 | 1.8 | 19.7715 | 6.3  | 0.1310 | 6.6  | 0.0188 | 2.0 | 0.30 | 120.0  | 2.4  | 125.0  | 7.8  | 221.6  | 146.7 | 120.0 | 2.4 |
| Nabesna-Spot 110 | 61  | 76049  | 2.7 | 21.6639 | 5.9  | 0.1196 | 6.0  | 0.0188 | 1.2 | 0.20 | 120.0  | 1.4  | 114.7  | 6.5  | 5.9    | 141.4 | 120.0 | 1.4 |
| Nabesna-Spot 95  | 168 | 21079  | 1.9 | 20.6081 | 3.2  | 0.1258 | 3.5  | 0.0188 | 1.5 | 0.43 | 120.1  | 1.8  | 120.3  | 4.0  | 124.9  | 74.6  | 120.1 | 1.8 |
| Nabesna-Spot 61  | 95  | 17459  | 2.9 | 21.7304 | 5.0  | 0.1193 | 5.2  | 0.0188 | 1.4 | 0.27 | 120.1  | 1.7  | 114.4  | 5.6  | 1.4    | 121.2 | 120.1 | 1.7 |
| Nabesna-Spot 19  | 70  | 39378  | 2.8 | 20.6061 | 5.2  | 0.1259 | 5.4  | 0.0188 | 1.4 | 0.27 | 120.1  | 1.7  | 120.4  | 6.1  | 125.1  | 122.8 | 120.1 | 1.7 |
| Nabesna-Spot 43  | 129 | 21209  | 3.0 | 20.0222 | 4.6  | 0.1296 | 4.8  | 0.0188 | 1.5 | 0.31 | 120.2  | 1.8  | 123.8  | 5.6  | 192.4  | 106.2 | 120.2 | 1.8 |
| Nabesna-Spot 74  | 86  | 22990  | 2.0 | 20.5483 | 5.2  | 0.1264 | 5.5  | 0.0188 | 1.8 | 0.33 | 120.3  | 2.2  | 120.8  | 6.3  | 131.7  | 121.8 | 120.3 | 2.2 |
| Nabesna-Spot 96  | 70  | 33959  | 2.6 | 19.6545 | 5.8  | 0.1321 | 6.3  | 0.0188 | 2.4 | 0.38 | 120.3  | 2.8  | 126.0  | 7.5  | 235.4  | 134.9 | 120.3 | 2.8 |
| Nabesna-Spot 45  | 108 | 30812  | 2.5 | 19.8423 | 3.4  | 0.1309 | 3.8  | 0.0188 | 1.5 | 0.41 | 120.3  | 1.8  | 124.9  | 4.4  | 213.4  | 79.7  | 120.3 | 1.8 |
| Nabesna-Spot 27  | 60  | 21485  | 2.7 | 20.1810 | 5.8  | 0.1290 | 6.2  | 0.0189 | 2.0 | 0.33 | 120.6  | 2.4  | 123.2  | 7.2  | 174.0  | 136.0 | 120.6 | 2.4 |
| Nabesna-Spot 72  | 69  | 12559  | 2.8 | 20.1595 | 6.3  | 0.1295 | 6.5  | 0.0189 | 1.4 | 0.22 | 120.9  | 1.7  | 123.6  | 7.6  | 176.5  | 147.7 | 120.9 | 1.7 |
| Nabesna-Spot 68  | 89  | 16337  | 2.6 | 20.6750 | 4.0  | 0.1262 | 4.3  | 0.0189 | 1.8 | 0.41 | 120.9  | 2.1  | 120.7  | 4.9  | 117.3  | 93.5  | 120.9 | 2.1 |
| Nabesna-Spot 97  | 125 | 83254  | 1.7 | 20.6517 | 4.3  | 0.1264 | 4.7  | 0.0189 | 1.9 | 0.40 | 120.9  | 2.3  | 120.9  | 5.4  | 119.9  | 101.6 | 120.9 | 2.3 |
| Nabesna-Spot 104 | 59  | 15610  | 2.4 | 19.6185 | 7.4  | 0.1331 | 7.8  | 0.0189 | 2.3 | 0.29 | 120.9  | 2.7  | 126.9  | 9.2  | 239.6  | 171.2 | 120.9 | 2.7 |
| Nabesna-Spot 73  | 124 | 16219  | 2.6 | 21.2922 | 4.4  | 0.1229 | 4.8  | 0.0190 | 1.9 | 0.39 | 121.2  | 2.2  | 117.7  | 5.3  | 47.5   | 104.7 | 121.2 | 2.2 |
| Nabesna-Spot 5   | 68  | 4707   | 2.8 | 22.2282 | 5.4  | 0.1178 | 5.8  | 0.0190 | 2.0 | 0.34 | 121.3  | 2.4  | 113.1  | 6.2  | 56.3   | 132.0 | 121.3 | 2.4 |
| Nabesna-Spot 58  | 97  | 15318  | 2.2 | 20.4983 | 5.6  | 0.1282 | 5.9  | 0.0191 | 1.7 | 0.29 | 121.7  | 2.0  | 122.5  | 6.8  | 137.5  | 132.7 | 121.7 | 2.0 |
| Nabesna-Spot 80  | 98  | 11107  | 2.3 | 21.5385 | 5.4  | 0.1221 | 5.8  | 0.0191 | 2.0 | 0.34 | 121.8  | 2.4  | 117.0  | 6.4  | 19.9   | 130.1 | 121.8 | 2.4 |
| Nabesna-Spot 56  | 23  | 41623  | 3.1 | 22.7104 | 7.9  | 0.1159 | 8.4  | 0.0191 | 2.8 | 0.34 | 121.9  | 3.4  | 111.4  | 8.9  | 108.8  | 195.5 | 121.9 | 3.4 |
| Nabesna-Spot 28  | 39  | 8608   | 3.3 | 20.7611 | 6.2  | 0.1269 | 6.6  | 0.0191 | 2.2 | 0.33 | 122.1  | 2.6  | 121.4  | 7.5  | 107.5  | 146.4 | 122.1 | 2.6 |
| Nabesna-Spot 10  | 79  | 23597  | 2.3 | 21.1642 | 5.4  | 0.1253 | 5.6  | 0.0192 | 1.5 | 0.26 | 122.8  | 1.8  | 119.9  | 6.3  | 61.9   | 128.2 | 122.8 | 1.8 |
| Nabesna-Spot 52  | 77  | 40826  | 2.4 | 19.8320 | 6.0  | 0.1341 | 6.3  | 0.0193 | 1.7 | 0.27 | 123.2  | 2.1  | 127.8  | 7.5  | 214.6  | 140.0 | 123.2 | 2.1 |
| Nabesna-Spot 54  | 69  | 23875  | 2.5 | 15.5511 | 5.6  | 0.1713 | 6.0  | 0.0193 | 2.3 | 0.38 | 123.3  | 2.8  | 160.5  | 9.0  | 751.6  | 118.2 | 123.3 | 2.8 |
| Nabesna-Spot 30  | 120 | 25284  | 4.2 | 20.3750 | 3.4  | 0.1348 | 3.6  | 0.0199 | 1.2 | 0.34 | 127.2  | 1.5  | 128.4  | 4.3  | 151.7  | 78.7  | 127.2 | 1.5 |
| Nabesna-Spot 2   | 407 | 9884   | 2.0 | 8.6824  | 48.0 | 0.3485 | 48.4 | 0.0204 | 4.8 | 0.40 | 428.0  | 2.3  | 280.8  | 44.5 | 4882.6 | 327.5 | 428.0 | 2.3 |
| Nabesna-Spot 34  | 618 | 64663  | 1.8 | 20.0822 | 2.1  | 0.1552 | 2.4  | 0.0226 | 1.2 | 0.49 | 144.1  | 1.7  | 146.5  | 3.3  | 185.4  | 48.5  | 144.1 | 1.7 |
| Nabesna-Spot 90  | 90  | 54856  | 1.6 | 18.9687 | 3.7  | 0.3403 | 4.0  | 0.0468 | 1.6 | 0.38 | 295.0  | 4.5  | 297.4  | 10.4 | 316.7  | 85.0  | 172.9 | 5.1 |
| Nabesna-Spot 71  | 915 | 120731 | 2.0 | 18.8385 | 1.3  | 0.3431 | 1.6  | 0.0469 | 1.0 | 0.60 | 295.3  | 2.8  | 299.5  | 4.1  | 332.3  | 28.9  | 295.0 | 4.5 |
| Nabesna-Spot 88  | 231 | 135630 | 2.6 | 13.0846 | 1.0  | 1.9678 | 1.4  | 0.1867 | 1.1 | 0.75 | 1103.7 | 10.9 | 1104.6 | 9.7  | 1106.2 | 19.1  | 295.3 | 2.8 |
